# Supplementary material for: Ni-Catalyzed enantioselective reductive aryl-alkenylation of alkenes: application to the synthesis of (+)-physovenine and (+)-physostigmine
Source: Royal Society of Chemistry journal article supplement (doi:10.1039/c9qo00744j), 2019-01-01
Supplement: c9qo00744j1.pdf [file c9qo00744j1.pdf]

**Ni-Catalyzed Enantioselective Reductive Aryl-  
Alkenylation of Alkenes: Application to the Synthesis of  
(+)-Physovenine and (+)-Physostigmine**

Yuxiu Li,<sup>‡</sup> Zhengtian Ding,<sup>‡</sup> Aiwen Lei\* and Wangqing Kong\*

The College of Chemistry and Molecular Sciences, Institute for Advanced  
Studies (IAS), College of Chemistry and Molecular Sciences, Wuhan  
University, Wuhan, Hubei 430072, P. R. China

# Content

|                                                                                 |     |
|---------------------------------------------------------------------------------|-----|
| 1. General information                                                          | S3  |
| 2. General procedures                                                           | S4  |
| 3. Additional experiments                                                       | S6  |
| 4. Characterization data of products                                            | S7  |
| 5. Synthetic Applications                                                       | S48 |
| 6. Copies of the $^1\text{H}$ , $^{19}\text{F}$ and $^{13}\text{C}$ NMR spectra | S50 |
| 7. References                                                                   | S86 |

## 1. General Information

$^1\text{H}$  and  $^{13}\text{C}$  NMR data were recorded with Bruker ADVANCE III (400 MHz) or JNM-ECZ400S/L1 (400 MHz) spectrometers. Chemical shifts are given in ppm. The spectra are calibrated to the residual  $^1\text{H}$  and  $^{13}\text{C}$  signals of the solvents. Multiplicities are abbreviated as follows: singlet (s), doublet (d), triplet (t), quartet (q), doublet-doublet (dd), quintet (quint), septet (sept), multiplet (m), and broad (b).  $^{19}\text{F}$  NMR spectra were recorded using  $\text{CFCl}_3$  as internal standard. Gas chromatography were determined with a Varian GC 2000 gas chromatography instrument with a FID detector. High-resolution mass spectra (HRMS) were recorded on DIONEX UltiMate 3000 & Bruker Compact TOF mass spectrometer. Enantiomeric excesses were determined with a SHIMADZU LC-20ADXR system using chiral stationary phase columns (DAICEL) by comparing the samples with the corresponding racemic samples. Column and elution details were specified in each entry.

**Materials and Methods:** Unless otherwise stated, starting materials were purchased from commercial suppliers (Adamas-beta<sup>®</sup>, Alfa, Aldrich and so on). All reactions dealing with air- or moisture-sensitive compounds were performed in the argon-filled glove box or by standard Schlenk techniques in oven-dried reaction vessels under argon atmosphere. Solvents were purchased in HPLC quality, degassed by purging thoroughly with nitrogen and dried over activated molecular sieves of appropriate size. More sensitive compounds were stored in a desiccator or in a glove-box if required. Reactions were monitored by thin layer chromatography (TLC) using glass 0.25 mm silica gel plates. Compounds were visualized by UV-light at 254 nm and by dipping the plates in an aqueous potassium permanganate solution followed by heating. Flash column chromatography was performed over silica gel (200-400 mesh).

## 2. General Procedures

### 2.1 General Procedure for Racemic Aryl-Alkenylation Reaction:

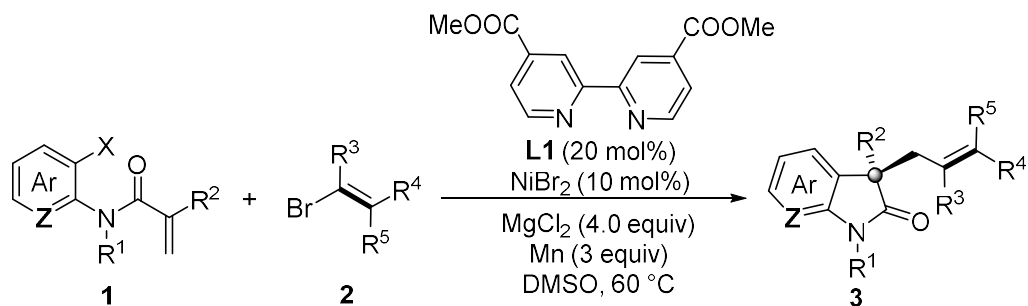

To a mixture of **1** (0.1 mmol), NiBr<sub>2</sub> (10 mol%), **L1** (20 mol%), Mn (3 equiv), MgCl<sub>2</sub> (4 equiv) and dry DMSO (2 mL) in a sealed tube was added alkenyl bromide **2** (0.3 mmol) under Argon. The reaction mixture was heated at 60 °C until the reaction was complete (monitored by TLC). The resulting mixture was quenched with sat. NH<sub>4</sub>Cl solution (5 mL) and further diluted with water (10 mL). The aqueous layer was extracted with EtOAc (3 x 15 mL) and the combined organic layers were washed with brine (2 x 20 mL), dried with MgSO<sub>4</sub>, filtered, and concentrated under reduced pressure. The residue was purified by chromatography on silica gel, eluting with ethyl acetate/petroleum ether 1:40~1:5 (v/v) to afford the desired product **3**.

### 2.2 General Procedure for Asymmetric Aryl-Alkenylation Reaction:

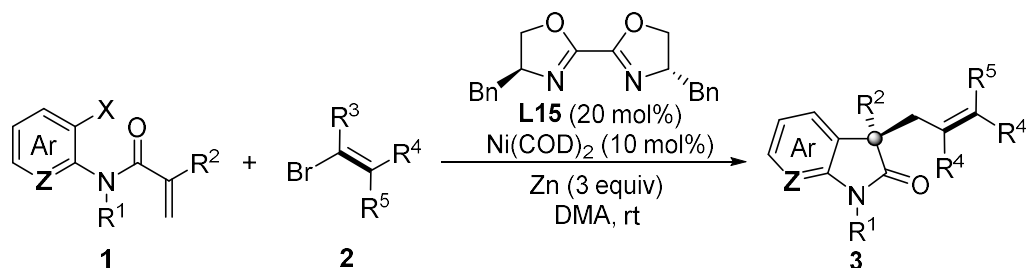

To a mixture of **1** (0.1 mmol), Ni(COD)<sub>2</sub> (10 mol%), **L15** (20 mol%), Zn (3 equiv) and dry DMA (2 mL) in a sealed tube was added alkenyl bromide **2** (0.3 mmol) under Argon. The reaction mixture was heated at room temperature until the reaction was complete (monitored by TLC). The resulting mixture was quenched with sat. NH<sub>4</sub>Cl solution (5 mL) and further diluted with water (10 mL). The aqueous layer was extracted with

EtOAc (3 x 15 mL) and the combined organic layers were washed with brine (2 x 20 mL), dried with MgSO<sub>4</sub>, filtered, and concentrated under reduced pressure. The residue was purified by chromatography on silica gel, eluting with ethyl acetate/petroleum ether 1:40~1:5 (v/v) to afford the desired product **3**.

### 3. Additional experiments

**Table S1. Optimization of reaction conditions<sup>a</sup>**

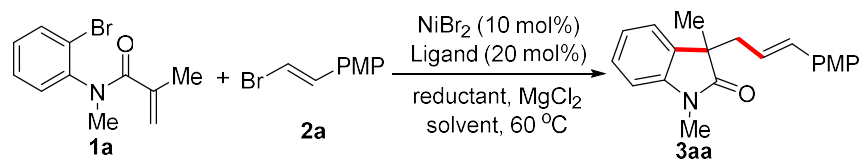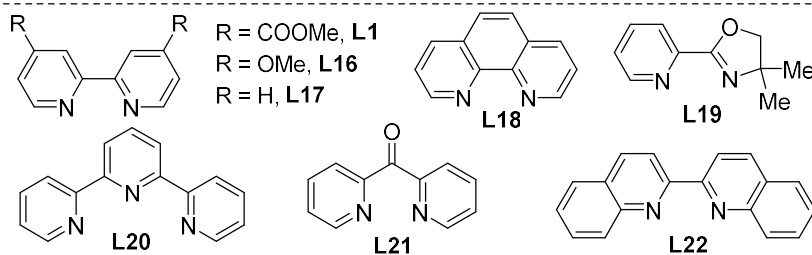

| entry           | ligand     | solvent     | reductant | yield of <b>3aa</b> (%) <sup>b</sup> |
|-----------------|------------|-------------|-----------|--------------------------------------|
| 1               | <b>L1</b>  | DMA         | Mn        | 83                                   |
| 2               | <b>L16</b> | DMA         | Mn        | 33                                   |
| 3               | <b>L17</b> | DMA         | Mn        | 40                                   |
| 4               | <b>L18</b> | DMA         | Mn        | 57                                   |
| 5               | <b>L19</b> | DMA         | Mn        | 44                                   |
| 6               | <b>L20</b> | DMA         | Mn        | trace                                |
| 7               | <b>L21</b> | DMA         | Mn        | trace                                |
| 8               | <b>L22</b> | DMA         | Mn        | 5                                    |
| 9               | <b>L1</b>  | DMA         | Zn        | 21                                   |
| 10              | <b>L1</b>  | DMA         | Mg        | trace                                |
| 11              | <b>L1</b>  | DMA         | TDAE      | 0                                    |
| 12              | <b>L1</b>  | <b>DMSO</b> | <b>Mn</b> | <b>90</b>                            |
| 13              | <b>L1</b>  | DMF         | Mn        | 65                                   |
| 14              | <b>L1</b>  | THF         | Mn        | 33                                   |
| 15              | <b>L1</b>  | MeCN        | Mn        | 33                                   |
| 16 <sup>c</sup> | <b>L1</b>  | DMSO        | Mn        | 0                                    |
| 17              | <b>L1</b>  | DMSO        | -         | 0                                    |

<sup>a</sup>Reactions were carried out with **1a** (0.1 mmol), **2a** (0.3 mmol), NiBr<sub>2</sub> (10 mol%), ligand (20 mol%), Mn (0.3 mmol), MgCl<sub>2</sub> (0.4 mmol) in 2 mL solvent at 60 °C for 12 h, unless noted otherwise. <sup>b</sup>Isolated yields. <sup>c</sup>Without NiBr<sub>2</sub>.

## 4. Characterization data of products

(*E*)-3-(3-(4-Methoxyphenyl)allyl)-1,3-dimethylindolin-2-one (**3aa**)

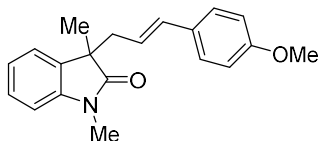

Chemical Formula: C<sub>20</sub>H<sub>21</sub>NO<sub>2</sub>

Exact Mass: 307.1572

**3aa** was prepared according to general procedure 2.1 using **1a** and **2a** and was purified by silica gel column chromatography (PE/EA = 40/1~5/1) to obtain **3aa** as yellow oil (90% yield). The <sup>1</sup>H NMR data matched those reported in the literature:<sup>1</sup> <sup>1</sup>H NMR (400 MHz, CDCl<sub>3</sub>): δ 7.29-7.24 (m, 1H), 7.22 (dd, *J* = 7.3, 0.7 Hz, 1H), 7.16-7.10 (m, 2H), 7.07 (td, *J* = 7.5, 0.9 Hz, 1H), 6.82 (d, *J* = 7.7 Hz, 1H), 6.80-6.75 (m, 2H), 6.29 (d, *J* = 15.7 Hz, 1H), 5.74 (ddd, *J* = 15.5, 8.0, 7.1 Hz, 1H), 3.77 (s, 3H), 3.18 (s, 3H), 2.70-2.52 (m, 2H), 1.41 (s, 3H); <sup>13</sup>C NMR (101 MHz, CDCl<sub>3</sub>) δ 180.3, 158.8, 143.1, 133.6, 133.0, 130.0, 127.7, 127.2, 122.9, 122.3, 121.8, 113.7, 107.9, 55.2, 48.7, 41.6, 26.1, 22.4.

The enantiomeric purity was established by HPLC analysis using a chiral column: AD-H column, 30 °C, *n*-Hexane/*i*-Propanol = 90/10 as eluent, 254 nm, 1 mL/min. t<sub>R</sub> = 6.7 min (minor), 8.0 min (major).

Optical Rotation: [α]<sub>D</sub><sup>33</sup> +4.6 (c 0.2, *i*PrOH) for 82% ee.

<色谱图>

mAU

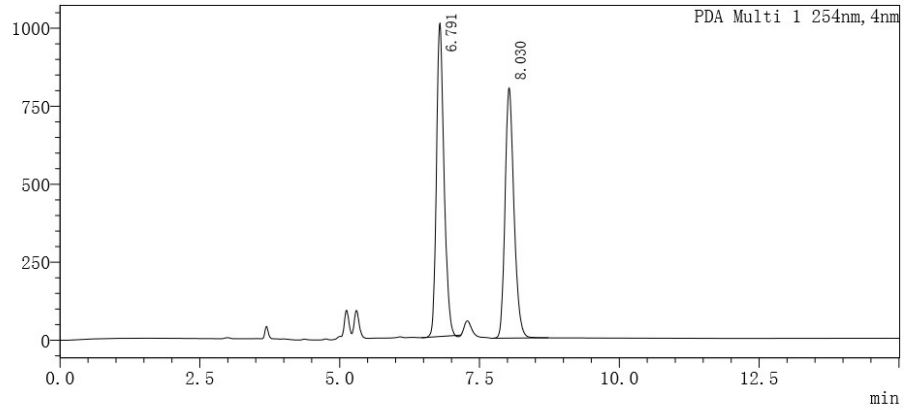

<峰表>

PDA Ch1 254nm

| 峰号 | 保留时间  | 面积       | 高度      | 浓度    | 浓度单位 | 标记 | 化合物名 |
|----|-------|----------|---------|-------|------|----|------|
| 1  | 6.791 | 9427568  | 1005492 | 0.000 |      | M  |      |
| 2  | 8.030 | 8914918  | 803087  | 0.000 |      | M  |      |
| 总计 |       | 18342485 | 1808579 |       |      |    |      |

peak number  
retention time  
area  
height

<色谱图>

mAU

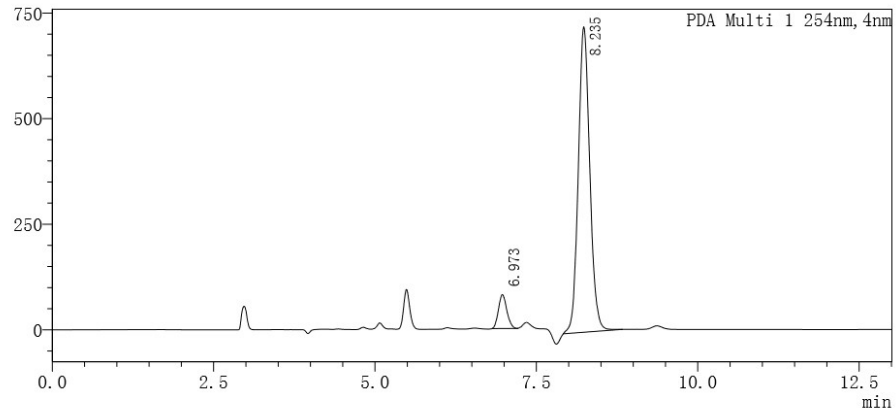

<峰表>

PDA Ch1 254nm

| 峰号 | 保留时间  | 面积      | 高度     | 浓度    | 浓度单位 | 标记 | 化合物名 |
|----|-------|---------|--------|-------|------|----|------|
| 1  | 6.973 | 720009  | 80407  | 0.000 |      | M  |      |
| 2  | 8.235 | 8935544 | 723294 | 0.000 |      | M  |      |
| 总计 |       | 9655554 | 803701 |       |      |    |      |

peak number  
retention time  
area  
height



(*E*)-3-(3-(4-Methoxyphenyl)allyl)-1,3,5-trimethylindolin-2-one (**3ba**)

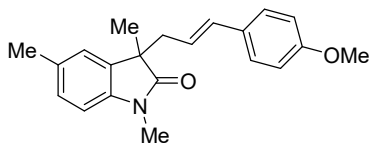

Chemical Formula: C<sub>21</sub>H<sub>23</sub>NO<sub>2</sub>  
Exact Mass: 321.1729

**3ba** was prepared according to general procedure 2.2 using **1b** and **2a** and was purified by silica gel column chromatography (PE/EA = 40/1~5/1) to obtain **3ba** as yellow oil (81% yield). <sup>1</sup>H NMR (400 MHz, CDCl<sub>3</sub>) δ 7.16-7.09 (m, 2H), 7.08-7.02 (m, 2H), 6.81-6.74 (m, 2H), 6.70 (d, *J* = 7.8 Hz, 1H), 6.29 (d, *J* = 15.7 Hz, 1H), 5.77-5.66 (m, 1H), 3.77 (s, 3H), 3.15 (s, 3H), 2.61 (dd, *J* = 7.6, 1.0 Hz, 2H), 2.35 (s, 3H), 1.39 (s, 3H); <sup>13</sup>C NMR (101 MHz, CDCl<sub>3</sub>) δ 180.2, 158.8, 140.8, 133.7, 132.9, 131.8, 130.2, 127.9, 127.2, 123.8, 122.1, 113.8, 107.6, 55.2, 48.7, 41.7, 26.1, 22.5, 21.2; HRMS: (ESI) calcd for C<sub>21</sub>H<sub>24</sub>NO<sub>2</sub><sup>+</sup>[M+H]<sup>+</sup> 322.1802; found 322.1795.

The enantiomeric purity was established by HPLC analysis using a chiral column: AD-H column, 30 °C, *n*-Hexane/*i*-Propanol = 90/10 as eluent, 254 nm, 1 mL/min. t<sub>R</sub> = 6.3 min (minor), 7.2 min (major).

Optical Rotation: [α]<sub>D</sub><sup>32</sup> +38.0 (c 0.5, *i*PrOH) for 90% ee.

<色谱图>

mAU

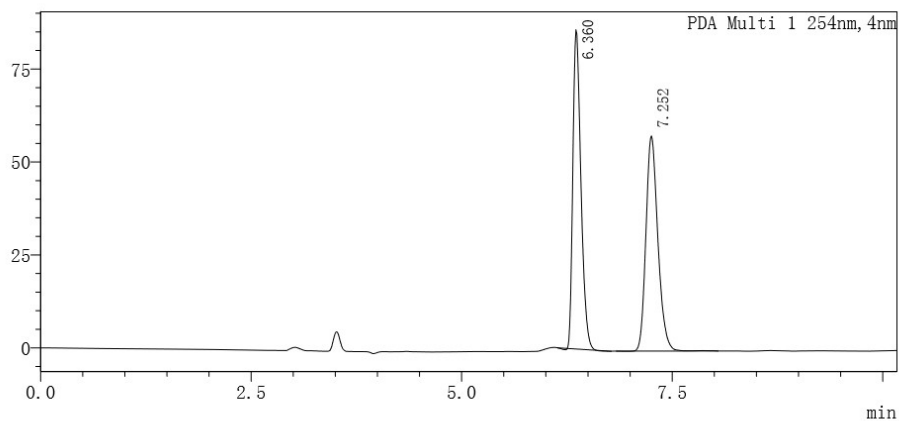

<峰表>

PDA Ch1 254nm

| 峰号 | 保留时间  | 面积      | 高度     | 浓度    | 浓度单位 | 标记 | 化合物名 |
|----|-------|---------|--------|-------|------|----|------|
| 1  | 6.360 | 568548  | 85891  | 0.000 |      | M  |      |
| 2  | 7.252 | 570176  | 57902  | 0.000 |      | M  |      |
| 总计 |       | 1138724 | 143793 |       |      |    |      |

peak number

retention time

area

height

<色谱图>

mAU

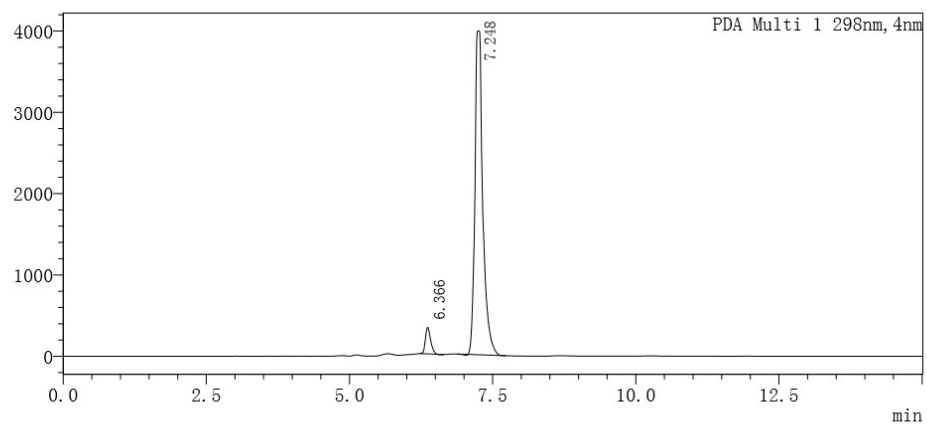

<峰表>

PDA Ch1 298nm

| 峰号 | 保留时间  | 面积       | 高度      | 浓度     | 浓度单位 | 标记 | 化合物名 |
|----|-------|----------|---------|--------|------|----|------|
| 1  | 6.366 | 2058009  | 325509  | 5.128  |      | M  |      |
| 2  | 7.248 | 38073549 | 3981463 | 94.872 |      | M  |      |
| 总计 |       | 40131558 | 4306973 |        |      |    |      |

peak number

retention time

area

height

(*E*)-5-Methoxy-3-(3-(4-methoxyphenyl)allyl)-1,3-dimethylindolin-2-one (**3ca**)

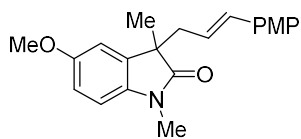

Chemical Formula: C<sub>21</sub>H<sub>23</sub>NO<sub>3</sub>  
Exact Mass: 337.1678

**3ca** was prepared according to general procedure 2.1 using **1c** and **2a** and was purified by silica gel column chromatography (PE/EA = 40/1~5/1) to obtain **3ca** as yellow oil (67% yield). <sup>1</sup>H NMR (400 MHz, CDCl<sub>3</sub>): δ 7.17-7.09 (m, 2H), 6.85 (d, *J* = 2.4 Hz, 1H), 6.81-6.75 (m, 3H), 6.72 (d, *J* = 8.4 Hz, 1H), 6.30 (d, *J* = 15.7 Hz, 1H), 5.73 (dt, *J* = 15.5, 7.5 Hz, 1H), 3.79 (s, 3H), 3.77 (s, 3H), 3.15 (s, 3H), 2.62 (dd, *J* = 7.5, 1.0 Hz, 2H), 1.40 (s, 3H); <sup>13</sup>C NMR (101 MHz, CDCl<sub>3</sub>) δ 179.9, 158.8, 155.8, 136.7, 135.0, 133.0, 130.0, 127.2, 121.8, 113.7, 111.6, 110.6, 108.1, 55.8, 55.2, 49.1, 41.6, 26.2, 22.6; HRMS: (ESI) calcd for C<sub>21</sub>H<sub>24</sub>NO<sub>3</sub><sup>+</sup>[M+H]<sup>+</sup> 338.1751; found 338.1743.

The enantiomeric purity was established by HPLC analysis using a chiral column: AD-H column, 30 °C, *n*-Hexane/*i*-Propanol = 90/10 as eluent, 254 nm, 1 mL/min. tR = 8.4 min (minor), 10.4 min (major).

Optical Rotation: [α]<sub>D</sub><sup>33</sup> +51.6 (c 0.2, *i*PrOH) for 80% ee.

<色谱图>

mAU

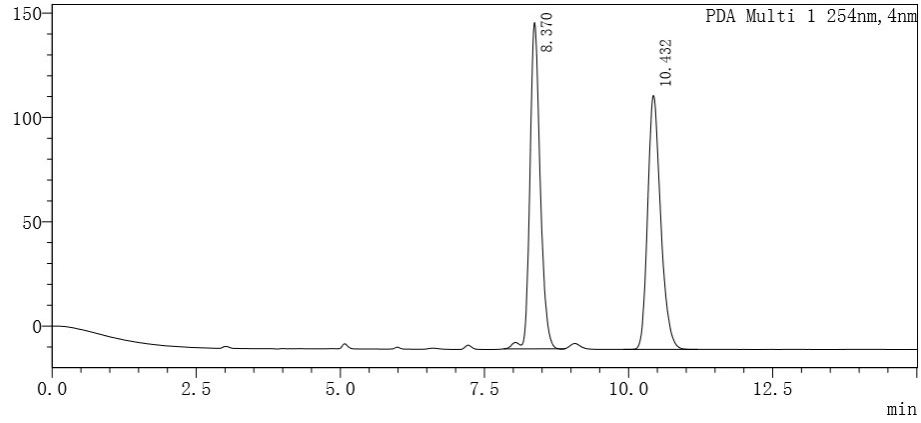

<峰表>

PDA Ch1 254nm

| 峰号 | 保留时间   | 面积      | 高度     | 浓度    | 浓度单位 | 标记 | 化合物名 |
|----|--------|---------|--------|-------|------|----|------|
| 1  | 8.370  | 1935394 | 156420 | 0.000 |      | M  |      |
| 2  | 10.432 | 1915029 | 121790 | 0.000 |      | M  |      |
| 总计 |        | 3850423 | 278210 |       |      |    |      |

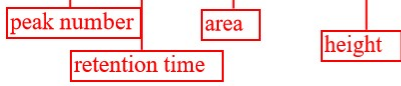

<色谱图>

mAU

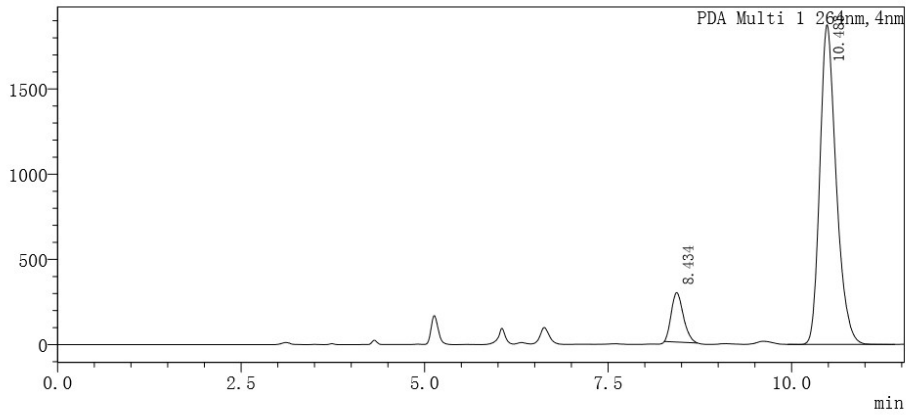

<峰表>

PDA Ch1 264nm

| 峰号 | 保留时间   | 面积       | 高度      | 浓度     | 浓度单位 | 标记 | 化合物名 |
|----|--------|----------|---------|--------|------|----|------|
| 1  | 8.434  | 3307516  | 289962  | 10.222 |      | M  |      |
| 2  | 10.483 | 29048073 | 1876373 | 89.778 |      | M  |      |
| 总计 |        | 32355588 | 2166335 |        |      |    |      |

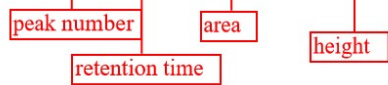

(*E*)-5-Fluoro-3-(3-(4-methoxyphenyl)allyl)-1,3-dimethylindolin-2-one (**3da**)

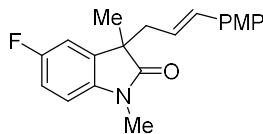

Chemical Formula: C<sub>20</sub>H<sub>20</sub>FNO<sub>2</sub>  
Exact Mass: 325.1478

**3da** was prepared according to general procedure 2.2 using **1d** and **2a** and was purified by silica gel column chromatography (PE/EA = 40/1~5/1) to obtain **3da** as yellow oil (74% yield). <sup>1</sup>H NMR (400 MHz, CDCl<sub>3</sub>): δ 7.17-7.11 (m, 2H), 7.00-6.92 (m, 2H), 6.82-6.75 (m, 2H), 6.73 (dt, *J* = 8.3, 3.3 Hz, 1H), 6.30 (t, *J* = 13.5 Hz, 1H), 5.70 (dt, *J* = 15.5, 7.6 Hz, 1H), 3.78 (s, 3H), 3.17 (s, 3H), 2.70-2.53 (m, 2H), 1.39 (d, *J* = 11.8 Hz, 3H); <sup>13</sup>C NMR (101 MHz, CDCl<sub>3</sub>) δ 179.9, 159.2 (d, *J* = 240.3 Hz), 158.9, 139.0, 135.3 (d, *J* = 7.8 Hz), 133.3, 129.8, 127.3, 121.3, 113.9 (d, *J* = 21.8 Hz), 113.8, 111.1 (d, *J* = 24.6 Hz), 108.3 (d, *J* = 8.1 Hz), 55.2, 49.2, 41.6, 26.3, 22.5; <sup>19</sup>F NMR (377 MHz, CDCl<sub>3</sub>) δ -120.83; HRMS: (ESI) calcd for C<sub>20</sub>H<sub>21</sub>FNO<sub>2</sub><sup>+</sup>[M+H]<sup>+</sup> 326.1551; found 326.1550.

The enantiomeric purity was established by HPLC analysis using a chiral column: AD-H column, 30 °C, *n*-Hexane/*i*-Propanol = 90/10 as eluent, 254 nm, 1 mL/min. t<sub>R</sub> = 7.0 min (minor), 8.2 min (major).

Optical Rotation: [α]<sub>D</sub><sup>32</sup> +3.7 (c 0.5, <sup>t</sup>PrOH) for 89% ee.

<色谱图>

mAU

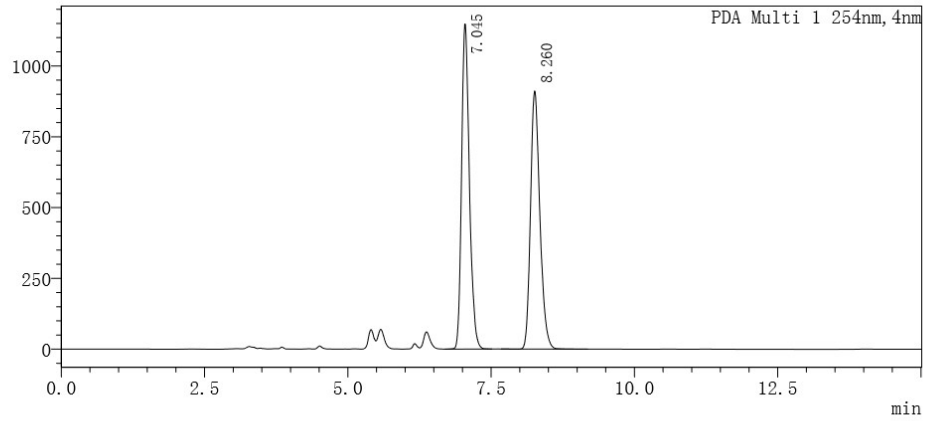

<峰表>

PDA Ch1 254nm

| 峰号 | 保留时间  | 面积       | 高度      | 浓度    | 浓度单位 | 标记 | 化合物名 |
|----|-------|----------|---------|-------|------|----|------|
| 1  | 7.045 | 10857885 | 1147868 | 0.000 |      | M  |      |
| 2  | 8.260 | 10307206 | 911310  | 0.000 |      | M  |      |
| 总计 |       | 21165092 | 2059178 |       |      |    |      |

peak number

retention time

area

height

<色谱图>

mAU

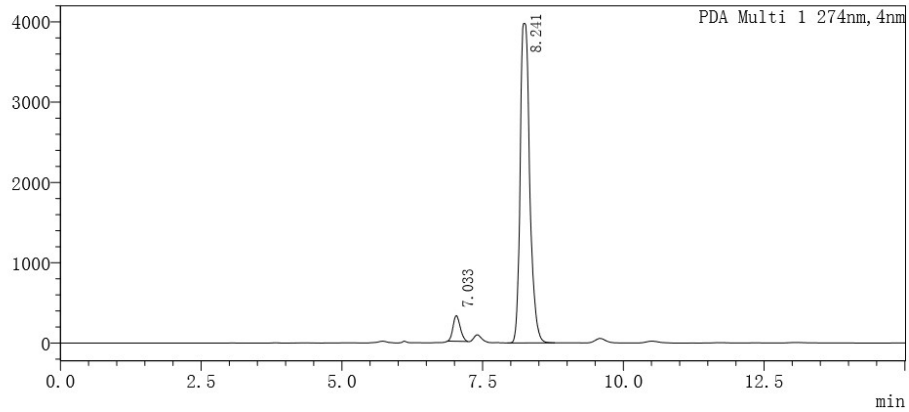

<峰表>

PDA Ch1 274nm

| 峰号 | 保留时间  | 面积       | 高度      | 浓度    | 浓度单位 | 标记 | 化合物名 |
|----|-------|----------|---------|-------|------|----|------|
| 1  | 7.033 | 2833135  | 318813  | 0.000 |      | M  |      |
| 2  | 8.241 | 47093285 | 3978539 | 0.000 |      | M  |      |
| 总计 |       | 49926421 | 4297353 |       |      |    |      |

peak number

retention time

area

height

(*E*)-3-(3-(4-Methoxyphenyl)allyl)-1,3-dimethyl-5-(trifluoromethyl)indolin-2-one (**3ea**)

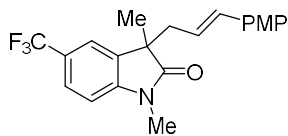

Chemical Formula: C<sub>21</sub>H<sub>20</sub>F<sub>3</sub>NO<sub>2</sub>  
Exact Mass: 375.1446

**3ea** was prepared according to general procedure 2.1 using **1e** and **2a** and was purified by silica gel column chromatography (PE/EA = 40/1~5/1) to obtain **3ea** as yellow oil (67% yield). <sup>1</sup>H NMR (400 MHz, CDCl<sub>3</sub>): δ 7.55 (dd, *J* = 8.1, 0.9 Hz, 1H), 7.45 (d, *J* = 1.1 Hz, 1H), 7.15-7.08 (m, 2H), 6.88 (d, *J* = 8.2 Hz, 1H), 6.82-6.74 (m, 2H), 6.28 (d, *J* = 15.7 Hz, 1H), 5.67 (dt, *J* = 15.5, 7.6 Hz, 1H), 3.77 (s, 3H), 3.20 (s, 3H), 2.65 (dd, *J* = 7.6, 1.0 Hz, 2H), 1.44 (s, 3H); <sup>13</sup>C NMR (101 MHz, CDCl<sub>3</sub>) δ 180.2, 159.0, 146.2, 134.2, 133.8, 129.8, 127.3, 126.1 (d, *J* = 58.0 Hz), 125.7 (q, *J* = 4.1 Hz), 124.6 (d, *J* = 32.6 Hz), 120.9, 119.9 (q, *J* = 3.6 Hz), 113.9, 107.7, 55.3, 48.8, 41.6, 26.4, 22.4; <sup>19</sup>F NMR (377 MHz, CDCl<sub>3</sub>) δ -61.27; HRMS: (ESI) calcd for C<sub>21</sub>H<sub>21</sub>F<sub>3</sub>NO<sub>2</sub><sup>+</sup>[M+H]<sup>+</sup> 376.1519; found 376.1525.

The enantiomeric purity was established by HPLC analysis using a chiral column: AD-H column, 30 °C, *n*-Hexane/*i*-Propanol = 90/10 as eluent, 254 nm, 1 mL/min. t<sub>R</sub> = 5.3 min (minor), 5.8 min (major).

Optical Rotation: [α]<sub>D</sub><sup>34</sup> +17.6 (c 0.5, *i*PrOH) for 82% ee.

<色谱图>  
mAU

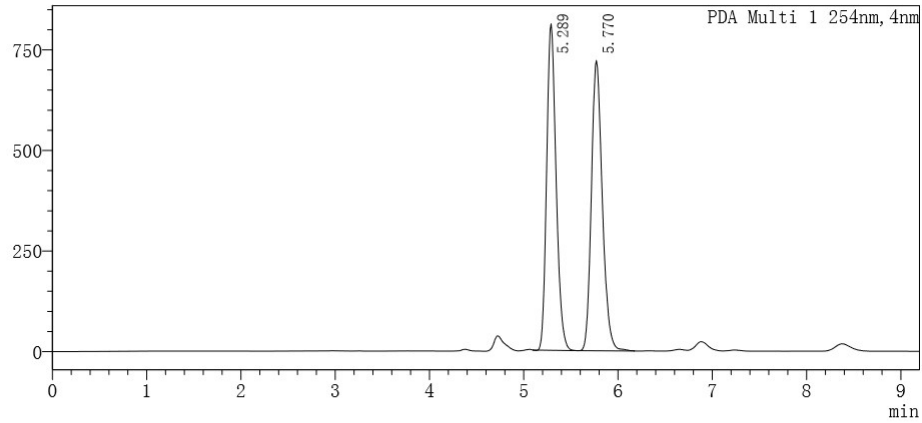

<峰表>

PDA Ch1 254nm

| 峰号 | 保留时间  | 面积       | 高度      | 浓度    | 浓度单位 | 标记 | 化合物名 |
|----|-------|----------|---------|-------|------|----|------|
| 1  | 5.289 | 5650133  | 811595  | 0.000 |      | M  |      |
| 2  | 5.770 | 5808626  | 721863  | 0.000 |      | M  |      |
| 总计 |       | 11458759 | 1533458 |       |      |    |      |

peak number

area

height

retention time

<色谱图>

mAU

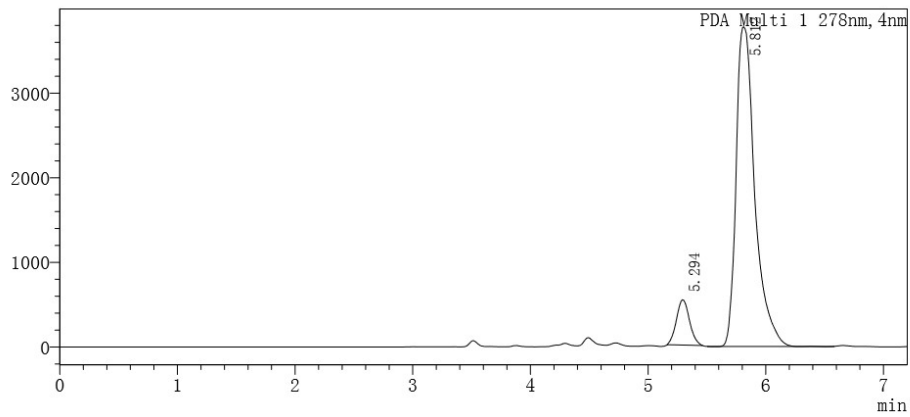

<峰表>

PDA Ch1 278nm

| 峰号 | 保留时间  | 面积       | 高度      | 浓度     | 浓度单位 | 标记 | 化合物名 |
|----|-------|----------|---------|--------|------|----|------|
| 1  | 5.294 | 4095710  | 534662  | 8.956  |      | M  |      |
| 2  | 5.812 | 41634265 | 3779279 | 91.044 |      | M  |      |
| 总计 |       | 45729975 | 4313942 |        |      |    |      |

peak number

area

height

retention time



(*E*)-3-(3-(4-Methoxyphenyl)allyl)-1,3,6-trimethylindolin-2-one (**3fa**)

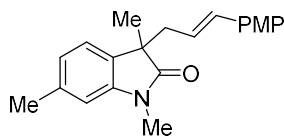

Chemical Formula: C<sub>21</sub>H<sub>23</sub>NO<sub>2</sub>  
Exact Mass: 321.1729

**3fa** was prepared according to general procedure 2.1 using **1f** and **2a** and was purified by silica gel column chromatography (PE/EA = 40/1~5/1) to obtain **3fa** as yellow oil (64% yield). <sup>1</sup>H NMR (400 MHz, CDCl<sub>3</sub>): δ 7.15 (d, *J* = 8.7 Hz, 2H), 7.10 (d, *J* = 7.5 Hz, 1H), 6.87 (d, *J* = 7.4 Hz, 1H), 6.78 (t, *J* = 5.8 Hz, 2H), 6.65 (s, 1H), 6.29 (d, *J* = 15.7 Hz, 1H), 5.76 (ddd, *J* = 15.5, 8.0, 7.1 Hz, 1H), 3.78 (s, 3H), 3.16 (s, 3H), 2.70-2.48 (m, 2H), 2.38 (s, 3H), 1.39 (s, 3H); <sup>13</sup>C NMR (101 MHz, CDCl<sub>3</sub>) δ 180.6, 158.8, 143.1, 137.8, 132.9, 130.7, 130.1, 127.2, 122.8, 122.7, 122.1, 113.7, 108.9, 55.2, 48.4, 41.6, 26.1, 22.6, 21.8; HRMS: (ESI) calcd for C<sub>21</sub>H<sub>24</sub>NO<sub>2</sub><sup>+</sup>[M+H]<sup>+</sup> 322.1802; found 322.1804.

(*E*)-6-chloro-3-(3-(4-methoxyphenyl)allyl)-1,3-dimethylindolin-2-one (**3ga**)

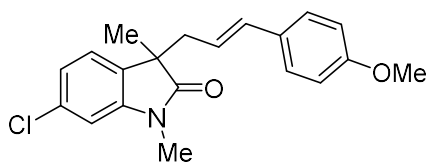

Chemical Formula: C<sub>20</sub>H<sub>20</sub>ClNO<sub>2</sub>

Exact Mass: 341.1183

**3ga** was prepared according to general procedure 2.2 using **1g** and **2a** and was purified by silica gel column chromatography (PE/EA = 40/1~5/1) to obtain **3ga** as yellow oil (44% yield). <sup>1</sup>H NMR (400 MHz, CDCl<sub>3</sub>) δ 7.17-7.10 (m, 3H), 7.03 (dd, *J* = 7.9, 1.8 Hz, 1H), 6.81 (d, *J* = 1.8 Hz, 1H), 6.80-6.76 (m, 2H), 6.28 (d, *J* = 15.7 Hz, 1H), 5.70 (dt, *J* = 15.4, 7.6 Hz, 1H), 3.78 (s, 3H), 3.16 (s, 3H), 2.68-2.49 (m, 2H), 1.39 (s, 3H); <sup>13</sup>C NMR (101 MHz, CDCl<sub>3</sub>) δ 180.1, 159.0, 144.3, 133.5, 133.4, 131.9, 129.8, 127.3, 123.8, 122.1, 121.3, 113.8, 108.7, 55.3, 48.5, 41.5, 26.2, 22.5; HRMS: (ESI) calcd for C<sub>20</sub>H<sub>21</sub>ClNO<sub>2</sub><sup>+</sup>[M+H]<sup>+</sup> 342.1255; found 342.1253.

The enantiomeric purity was established by HPLC analysis using a chiral column: AD-H column, 30 °C, *n*-Hexane/*i*-Propanol = 90/10 as eluent, 254 nm, 1 mL/min. t<sub>R</sub> = 6.6 min (minor), 6.9 min (major).

Optical Rotation: [α]<sub>D</sub><sup>33</sup> +7.9 (c 0.2, *i*PrOH) for 85% ee.

<色谱图>

mAU

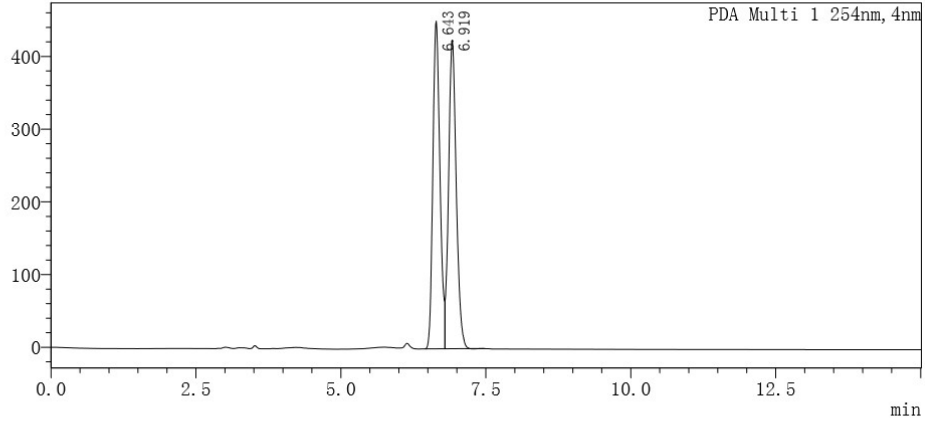

<峰表>

PDA Ch1 254nm

| 峰号 | 保留时间  | 面积      | 高度     | 浓度    | 浓度单位 | 标记  | 化合物名 |
|----|-------|---------|--------|-------|------|-----|------|
| 1  | 6.643 | 3835833 | 450841 | 0.000 |      | M   |      |
| 2  | 6.919 | 3877884 | 424547 | 0.000 |      | V M |      |
| 总计 |       | 7713716 | 875388 |       |      |     |      |

peak number

area

height

retention time

<色谱图>

mAU

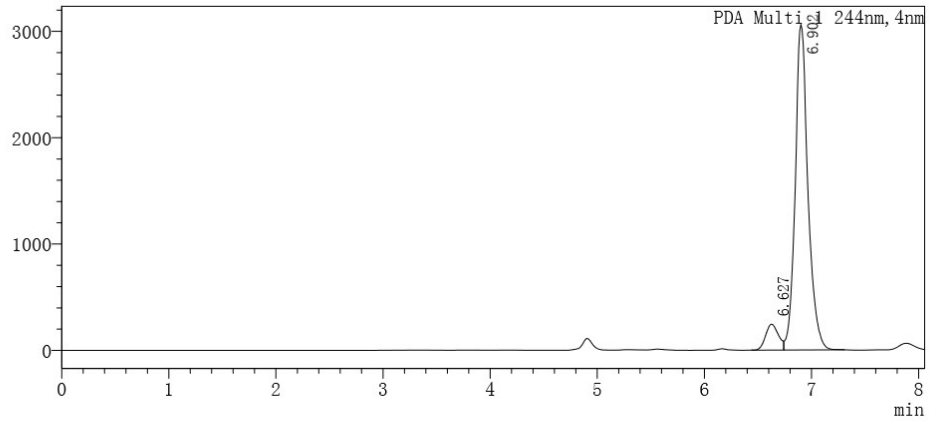

<峰表>

PDA Ch1 244nm

| 峰号 | 保留时间  | 面积       | 高度      | 浓度     | 浓度单位 | 标记  | 化合物名 |
|----|-------|----------|---------|--------|------|-----|------|
| 1  | 6.627 | 2053514  | 243995  | 7.523  |      | M   |      |
| 2  | 6.902 | 25242984 | 3062902 | 92.477 |      | V M |      |
| 总计 |       | 27296499 | 3306897 |        |      |     |      |

peak number

area

height

retention time

(*E*)-6-Methoxy-3-(3-(4-methoxyphenyl)allyl)-1,3-dimethylindolin-2-one (**3ha**)

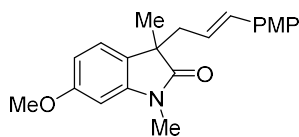

Chemical Formula: C<sub>21</sub>H<sub>23</sub>NO<sub>3</sub>  
Exact Mass: 337.1678

**3ha** was prepared according to general procedure 2.1 using **1h** and **2a** and was purified by silica gel column chromatography (PE/EA = 40/1~5/1) to obtain **3ha** as yellow oil (74% yield). <sup>1</sup>H NMR (400 MHz, CDCl<sub>3</sub>): δ 7.18-7.12 (m, 2H), 7.10 (d, *J* = 8.1 Hz, 1H), 6.82-6.75 (m, 2H), 6.56 (dd, *J* = 8.1, 2.3 Hz, 1H), 6.41 (d, *J* = 2.3 Hz, 1H), 6.29 (d, *J* = 15.8 Hz, 1H), 5.80-5.68 (m, 1H), 3.82 (s, 3H), 3.77 (s, 3H), 3.15 (s, 3H), 2.67-2.50 (m, 2H), 1.38 (s, 3H); <sup>13</sup>C NMR (101 MHz, CDCl<sub>3</sub>) δ 180.8, 159.8, 158.8, 144.3, 132.9, 130.1, 127.2, 125.6, 123.4, 122.1, 113.7, 106.0, 96.0, 55.5, 55.2, 48.2, 41.8, 26.1, 22.6; HRMS: (ESI) calcd for C<sub>21</sub>H<sub>24</sub>NO<sub>3</sub><sup>+</sup>[M+H]<sup>+</sup> 338.1751; found 338.1747.

(*E*)-3-(3-(4-Methoxyphenyl)allyl)-1,3,7-trimethylindolin-2-one (**3ia**)

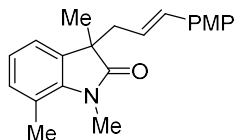

Chemical Formula: C<sub>21</sub>H<sub>23</sub>NO<sub>2</sub>  
Exact Mass: 321.1729

**3ha** was prepared according to general procedure 2.1 using **1h** and **2a** and was purified by silica gel column chromatography (PE/EA = 40/1~5/1) to obtain **3ha** as yellow oil (63% yield). <sup>1</sup>H NMR (400 MHz, CDCl<sub>3</sub>) δ 7.19-7.10 (m, 2H), 7.06 (dd, *J* = 6.9, 1.4 Hz, 1H), 7.01-6.90 (m, 2H), 6.82-6.75 (m, 2H), 6.28 (d, *J* = 15.7 Hz, 1H), 5.73 (dt, *J* = 15.5, 7.5 Hz, 1H), 3.78 (s, 3H), 3.46 (s, 3H), 2.63-2.58 (m, 2H), 2.56 (s, 3H), 1.38 (s, 3H); <sup>13</sup>C NMR (101 MHz, CDCl<sub>3</sub>) δ 181.0, 158.8, 140.84 134.3, 132.9, 131.5, 130.1, 127.3, 122.2, 122.1, 120.8, 119.5, 113.8, 55.2, 47.9, 41.9, 29.5, 22.9, 19.1; HRMS: (ESI) calcd for C<sub>21</sub>H<sub>24</sub>NO<sub>2</sub><sup>+</sup>[M+H]<sup>+</sup> 322.1802; found 322.1809.

(*E*)-1-(3-(4-Methoxyphenyl)allyl)-1,8-dimethyl-5,6-dihydro-4H-pyrrolo[3,2-*i*]quinolin-2(1H)-one (**3ja**)

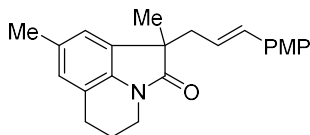

Chemical Formula:  $C_{23}H_{25}NO_2$   
Exact Mass: 347.1885

**3ja** was prepared according to general procedure 2.1 using **1j** and **2a** and was purified by silica gel column chromatography (PE/EA = 40/1~5/1) to obtain **3ja** as yellow oil (74% yield).  $^1H$  NMR (400 MHz,  $CDCl_3$ ):  $\delta$  7.14 (t,  $J$  = 5.7 Hz, 2H), 6.85 (d,  $J$  = 16.4 Hz, 2H), 6.81-6.75 (m, 2H), 6.30 (d,  $J$  = 15.8 Hz, 1H), 5.78 (dt,  $J$  = 15.4, 7.5 Hz, 1H), 3.77 (s, 3H), 3.65 (td,  $J$  = 6.8, 4.7 Hz, 2H), 2.70 (t,  $J$  = 6.0 Hz, 2H), 2.65-2.50 (m, 2H), 2.32 (s, 3H), 2.03-1.80 (m, 2H), 1.39 (s, 3H);  $^{13}C$  NMR (101 MHz,  $CDCl_3$ )  $\delta$  179.0, 158.8, 136.4, 132.8, 132.2, 131.3, 130.2, 127.2, 126.9, 122.3, 121.6, 119.7, 113.8, 55.2, 50.1, 41.4, 38.7, 24.5, 22.1, 21.4, 21.4; HRMS: (ESI) calcd for  $C_{23}H_{26}NO_2^+[M+H]^+$  348.1958; found 348.1953.

(*E*)-3-(3-(4-Methoxyphenyl)allyl)-1,3-dimethyl-1,3-dihydro-2*H*-pyrrolo[2,3-*b*]pyridin-2-one (**3ka**)

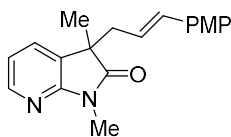

Chemical Formula:  $C_{19}H_{20}N_2O_2$   
Exact Mass: 308.1525

**3ka** was prepared according to general procedure 2.1 using **1k** and **2a** and was purified by silica gel column chromatography (PE/EA = 40/1~5/1) to obtain **3ka** as yellow oil (89% yield).  $^1H$  NMR (400 MHz,  $CDCl_3$ ):  $\delta$  8.17 (dd,  $J$  = 5.3, 1.5 Hz, 1H), 7.43 (dd,  $J$  = 7.2, 1.5 Hz, 1H), 7.15 (t,  $J$  = 5.7 Hz, 2H), 6.95 (dd,  $J$  = 7.2, 5.3 Hz, 1H), 6.82-6.76 (m, 2H), 6.30 (d,  $J$  = 15.7 Hz, 1H), 5.77 (dt,  $J$  = 15.5, 7.6 Hz, 1H), 3.78 (s, 3H), 3.28 (s, 3H), 2.73-2.52 (m, 2H), 1.43 (s, 3H);  $^{13}C$  NMR (101 MHz,  $CDCl_3$ )  $\delta$  179.9, 159.0, 156.6, 146.7, 133.7, 130.4, 129.7, 128.0, 127.3, 120.9, 117.9, 113.9, 55.3, 48.3, 41.1, 25.3, 21.9; HRMS: (ESI) calcd for  $C_{19}H_{21}N_2O_2^+[M+H]^+$  305.1598; found 309.1593.

(*E*)-3-Hexyl-3-(3-(4-methoxyphenyl)allyl)-1-methylindolin-2-one (**3la**)

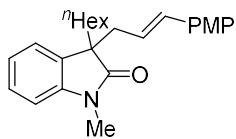

Chemical Formula: C<sub>25</sub>H<sub>31</sub>NO<sub>2</sub>  
Exact Mass: 377.2355

**3la** was prepared according to general procedure 2.1 using **11** and **2a** and was purified by silica gel column chromatography (PE/EA = 40/1~5/1) to obtain **3la** as yellow oil (82% yield). <sup>1</sup>H NMR (400 MHz, CDCl<sub>3</sub>): δ 7.29-7.22 (m, 1H), 7.19 (d, *J* = 7.3 Hz, 1H), 7.15-7.03 (m, 3H), 6.79 (dd, *J* = 15.0, 8.2 Hz, 3H), 6.26 (d, *J* = 15.7 Hz, 1H), 5.70 (dt, *J* = 15.5, 7.5 Hz, 1H), 3.77 (s, 3H), 3.17 (s, 3H), 2.71-2.53 (m, 2H), 1.95 (td, *J* = 12.8, 4.6 Hz, 1H), 1.81 (td, *J* = 12.8, 4.4 Hz, 1H), 1.32-1.06 (m, 7H), 1.03-0.89 (m, 1H), 0.80 (t, *J* = 7.0 Hz, 3H); <sup>13</sup>C NMR (101 MHz, CDCl<sub>3</sub>) δ 179.7, 158.8, 143.8, 132.8, 132.0, 130.1, 127.6, 127.2, 123.0, 122.3, 121.9, 113.7, 107.8, 55.2, 53.4, 41.4, 36.8, 31.5, 29.4, 26.0, 24.2, 22.5, 14.0; HRMS: (ESI) calcd for C<sub>25</sub>H<sub>32</sub>NO<sub>2</sub><sup>+</sup>[M+H]<sup>+</sup> 378.2428; found 378.2427.

The enantiomeric purity was established by HPLC analysis using a chiral column: AD-H column, 30 °C, *n*-Hexane/*i*-Propanol = 90/10 as eluent, 254 nm, 1 mL/min. t<sub>R</sub> = 6.2 min (minor), 7.0 min (major).

Optical Rotation: [α]<sub>D</sub><sup>35</sup> +3.8 (c 0.5, <sup>t</sup>PrOH) for 80% ee.

<色谱图>

mAU

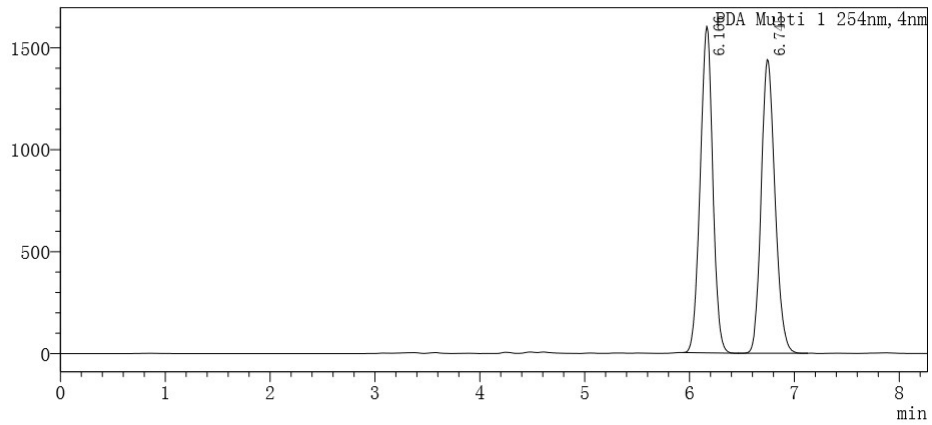

<峰表>

PDA Ch1 254nm

| 峰号 | 保留时间  | 面积       | 高度      | 浓度    | 浓度单位 | 标记 | 化合物名 |
|----|-------|----------|---------|-------|------|----|------|
| 1  | 6.166 | 13318316 | 1604660 | 0.000 |      | M  |      |
| 2  | 6.745 | 13257997 | 1442081 | 0.000 |      | M  |      |
| 总计 |       | 26576312 | 3046742 |       |      |    |      |

peak number

area

height

retention time

<色谱图>

mAU

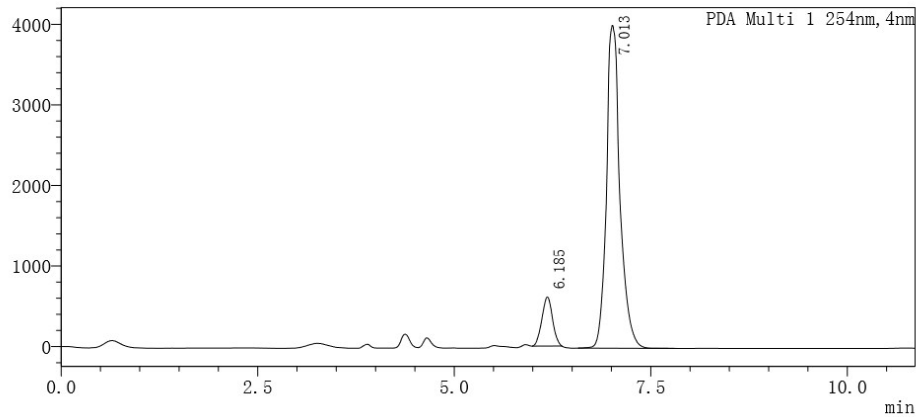

<峰表>

PDA Ch1 254nm

| 峰号 | 保留时间  | 面积       | 高度      | 浓度    | 浓度单位 | 标记 | 化合物名 |
|----|-------|----------|---------|-------|------|----|------|
| 1  | 6.185 | 5698373  | 609996  | 0.000 |      | M  |      |
| 2  | 7.013 | 48023861 | 4007492 | 0.000 |      | M  |      |
| 总计 |       | 53722234 | 4617488 |       |      |    |      |

peak number

area

height

retention time

(*E*)-3-Isopropyl-3-(3-(4-methoxyphenyl)allyl)-1-methylindolin-2-one (**3ma**)

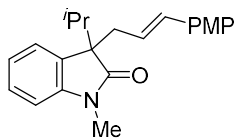

Chemical Formula: C<sub>22</sub>H<sub>25</sub>NO<sub>2</sub>  
Exact Mass: 335.1885

**3ma** was prepared according to general procedure 2.1 using **1m** and **2a** and was purified by silica gel column chromatography (PE/EA = 40/1~5/1) to obtain **3ma** as yellow oil (55% yield). <sup>1</sup>H NMR (400 MHz, CDCl<sub>3</sub>): δ 7.29-7.21 (m, 2H), 7.06 (ddd, *J* = 7.6, 4.6, 1.6 Hz, 3H), 6.78 (d, *J* = 7.6 Hz, 1H), 6.76-6.70 (m, 2H), 6.24 (d, *J* = 15.7 Hz, 1H), 5.66-5.53 (m, 1H), 3.75 (s, 3H), 3.14 (s, 3H), 2.73 (dddd, *J* = 13.5, 9.1, 7.5, 1.0 Hz, 2H), 2.25 (hept, *J* = 6.8 Hz, 1H), 0.99 (d, *J* = 6.9 Hz, 3H), 0.77 (d, *J* = 6.8 Hz, 3H); <sup>13</sup>C NMR (101 MHz, CDCl<sub>3</sub>) δ 179.4, 158.7, 144.1, 132.5, 130.9, 130.2, 127.6, 127.1, 123.7, 122.2, 122.0, 113.7, 107.6, 56.6, 55.2, 38.7, 34.6, 25.8, 17.4, 17.3; HRMS: (ESI) calcd for C<sub>22</sub>H<sub>26</sub>NO<sub>2</sub><sup>+</sup>[M+H]<sup>+</sup> 336.1958; found 336.1956.



(*E*)-3-Benzyl-3-(3-(4-methoxyphenyl)allyl)-1-methylindolin-2-one (**3na**)

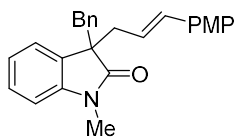

Chemical Formula: C<sub>26</sub>H<sub>25</sub>NO<sub>2</sub>  
Exact Mass: 383.1885

**3na** was prepared according to general procedure 2.1 using **1n** and **2a** and was purified by silica gel column chromatography (PE/EA = 40/1~5/1) to obtain **3na** as yellow oil (82% yield). <sup>1</sup>H NMR (400 MHz, CDCl<sub>3</sub>): δ 7.22 (dd, *J* = 7.3, 0.7 Hz, 1H), 7.19-7.14 (m, 1H), 7.14-7.10 (m, 2H), 7.08-6.98 (m, 4H), 6.85 (dd, *J* = 7.2, 2.2 Hz, 2H), 6.81-6.72 (m, 2H), 6.56 (d, *J* = 7.7 Hz, 1H), 6.33 (d, *J* = 15.7 Hz, 1H), 5.80-5.66 (m, 1H), 3.76 (s, 3H), 3.20 (d, *J* = 13.0 Hz, 1H), 3.09 (d, *J* = 13.0 Hz, 1H), 2.93 (s, 3H), 2.86-2.74 (m, 2H); <sup>13</sup>C NMR (101 MHz, CDCl<sub>3</sub>) δ 178.7, 158.8, 143.6, 135.9, 133.1, 130.7, 130.0, 129.8, 127.8, 127.5, 127.3, 126.3, 123.8, 121.9, 121.7, 113.7, 107.7, 55.2, 54.8, 43.1, 40.5, 25.8; HRMS: (ESI) calcd for C<sub>26</sub>H<sub>26</sub>NO<sub>2</sub><sup>+</sup>[M+H]<sup>+</sup> 384.1958; found 384.1962.

The enantiomeric purity was established by HPLC analysis using a chiral column: AD-H column, 30 °C, *n*-Hexane/*i*-Propanol = 90/10 as eluent, 254 nm, 1 mL/min. t<sub>R</sub> = 9.9 min (major), 10.4 min (minor).

Optical Rotation: [α]<sub>D</sub><sup>32</sup> -9.8 (c 0.5, <sup>t</sup>PrOH) for 76% ee.

<色谱图>

mAU

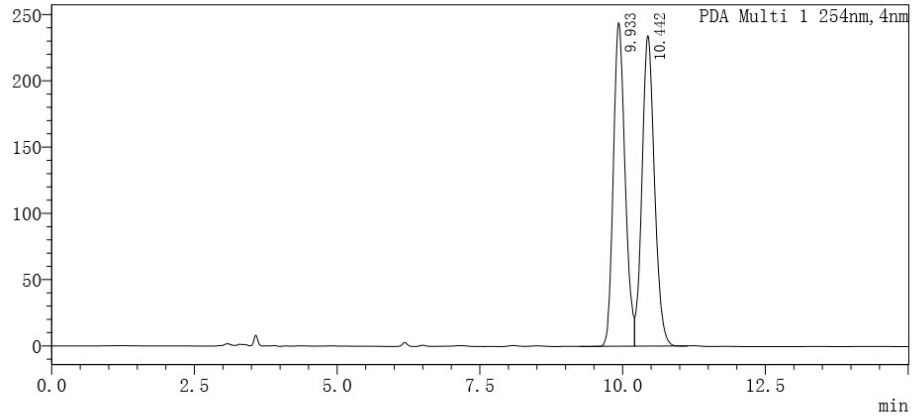

<峰表>

PDA Ch1 254nm

| 峰号 | 保留时间   | 面积      | 高度     | 浓度    | 浓度单位 | 标记  | 化合物名 |
|----|--------|---------|--------|-------|------|-----|------|
| 1  | 9.933  | 3478099 | 244178 | 0.000 |      | M   |      |
| 2  | 10.442 | 3557691 | 234336 | 0.000 |      | V M |      |
| 总计 |        | 7035789 | 478514 |       |      |     |      |

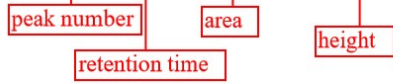

<色谱图>

mAU

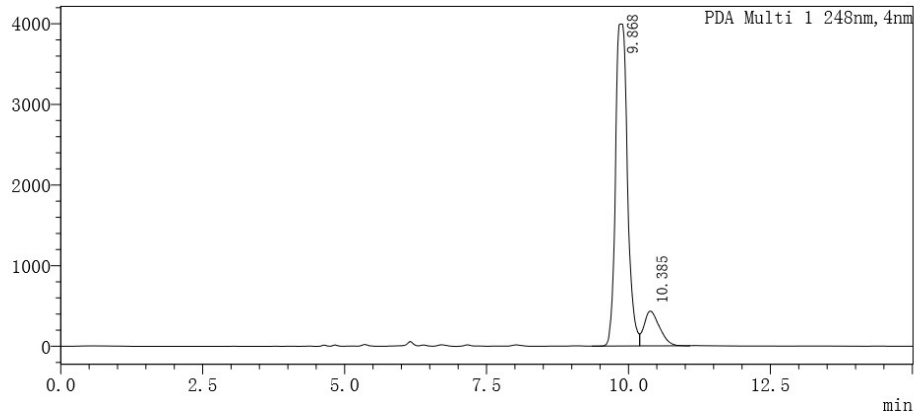

<峰表>

PDA Ch1 248nm

| 峰号 | 保留时间   | 面积       | 高度      | 浓度     | 浓度单位 | 标记  | 化合物名 |
|----|--------|----------|---------|--------|------|-----|------|
| 1  | 9.868  | 58440116 | 3992110 | 87.789 |      | M   |      |
| 2  | 10.385 | 8128827  | 432931  | 12.211 |      | V M |      |
| 总计 |        | 66568943 | 4425041 |        |      |     |      |

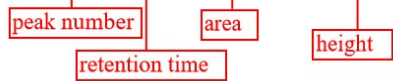

(*E*)-3-(Methoxymethyl)-3-(3-(4-methoxyphenyl)allyl)-1-methylindolin-2-one (**3oa**)

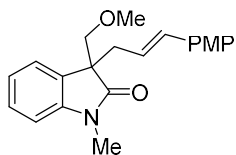

Chemical Formula: C<sub>21</sub>H<sub>23</sub>NO<sub>3</sub>  
Exact Mass: 337.1678

**3oa** was prepared according to general procedure 2.1 using **1o** and **2a** and was purified by silica gel column chromatography (PE/EA = 40/1~5/1) to obtain **3oa** as yellow oil (63% yield). <sup>1</sup>H NMR (400 MHz, CDCl<sub>3</sub>): δ 7.32 (dd, *J* = 7.3, 0.7 Hz, 1H), 7.30-7.26 (m, 2H), 7.16-7.04 (m, 3H), 6.86-6.72 (m, 3H), 6.29 (d, *J* = 15.7 Hz, 1H), 5.69 (ddd, *J* = 15.5, 8.2, 7.0 Hz, 1H), 3.77 (s, 3H), 3.72 (q, *J* = 9.0 Hz, 2H), 3.25 (d, *J* = 4.8 Hz, 3H), 3.22 (d, *J* = 3.4 Hz, 1H), 3.18 (s, 3H), 2.72 (ddd, *J* = 13.5, 6.9, 1.2 Hz, 1H), 2.61 (ddd, *J* = 13.6, 8.2, 0.8 Hz, 1H); <sup>13</sup>C NMR (101 MHz, CDCl<sub>3</sub>) δ 177.9, 158.8, 143.9, 133.1, 130.6, 129.9, 128.1, 127.2, 123.4, 122.3, 121.0, 113.7, 107.9, 76.1, 59.5, 55.2, 54.0, 37.5, 26.2; HRMS: (ESI) calcd for C<sub>21</sub>H<sub>24</sub>NO<sub>3</sub><sup>+</sup>[M+H]<sup>+</sup> 338.1751; found 338.1752.

The enantiomeric purity was established by HPLC analysis using a chiral column: AD-H column, 30 °C, *n*-Hexane/*i*-Propanol = 90/10 as eluent, 254 nm, 1 mL/min. t<sub>R</sub> = 9.9 min (major), 10.7 min (minor).

Optical Rotation: [α]<sub>D</sub><sup>34</sup> +5.6 (c 0.5, *i*PrOH) for 89% ee.

<色谱图>

mAU

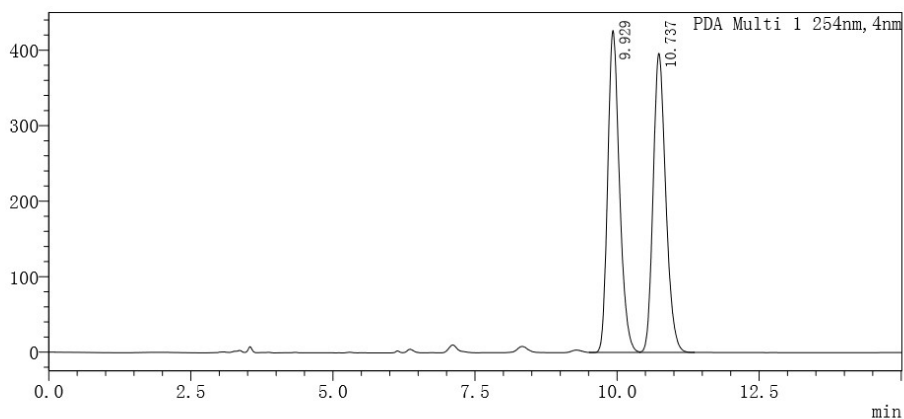

<峰表>

PDA Ch1 254nm

| 峰号 | 保留时间   | 面积       | 高度     | 浓度    | 浓度单位 | 标记  | 化合物名 |
|----|--------|----------|--------|-------|------|-----|------|
| 1  | 9.929  | 6125839  | 426724 | 0.000 |      | M   |      |
| 2  | 10.737 | 6130416  | 396211 | 0.000 |      | V M |      |
| 总计 |        | 12256254 | 822935 |       |      |     |      |

peak number

retention time

area

height

<色谱图>

mAU

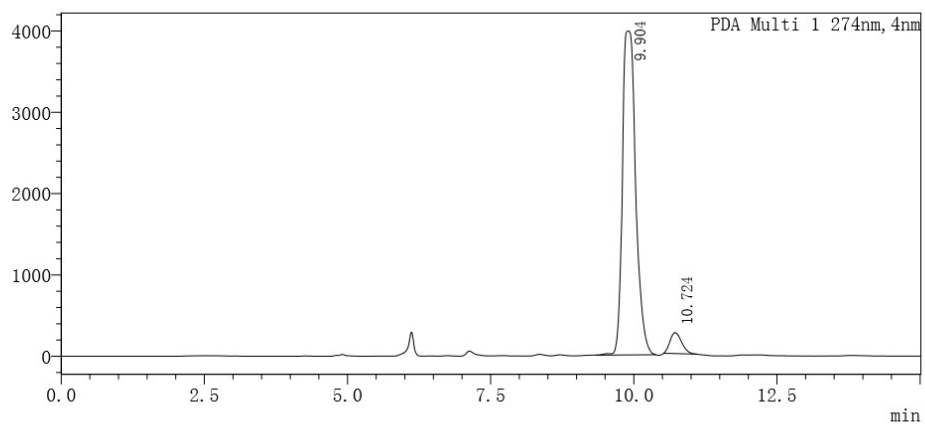

<峰表>

PDA Ch1 274nm

| 峰号 | 保留时间   | 面积       | 高度      | 浓度    | 浓度单位 | 标记 | 化合物名 |
|----|--------|----------|---------|-------|------|----|------|
| 1  | 9.904  | 64224535 | 3983537 | 0.000 |      | M  |      |
| 2  | 10.724 | 3645680  | 259869  | 0.000 |      | M  |      |
| 总计 |        | 67870215 | 4243407 |       |      |    |      |

peak number

retention time

area

height

(*E*)-1-Benzyl-3-(3-(4-methoxyphenyl)allyl)-3-methylindolin-2-one (**3pa**)

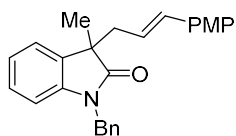

Chemical Formula: C<sub>26</sub>H<sub>25</sub>NO<sub>2</sub>

Exact Mass: 383.1885

**3pa** was prepared according to general procedure 2.1 using **1p** and **2a** and was purified by silica gel column chromatography (PE/EA = 40/1~5/1) to obtain **3pa** as yellow oil (84% yield). <sup>1</sup>H NMR (400 MHz, CDCl<sub>3</sub>): δ 7.28-7.22 (m, 1H), 7.12 (ddd, *J* = 18.0, 11.9, 5.0 Hz, 6H), 7.04 (td, *J* = 7.6, 1.0 Hz, 1H), 6.99 (t, *J* = 7.6 Hz, 2H), 6.82-6.74 (m, 2H), 6.35 (d, *J* = 15.8 Hz, 1H), 5.74-5.54 (m, 1H), 5.17 (d, *J* = 15.8 Hz, 1H), 4.60 (d, *J* = 15.8 Hz, 1H), 3.79 (s, 3H), 2.85-2.59 (m, 2H), 1.48 (s, 3H); <sup>13</sup>C NMR (101 MHz, CDCl<sub>3</sub>) δ 180.3, 158.9, 142.3, 135.7, 133.5, 133.2, 130.0, 128.7, 127.8, 127.4, 127.3, 127.0, 122.9, 122.5, 121.9, 113.8, 109.2, 55.3, 49.0, 43.7, 42.0, 23.4; HRMS: (ESI) calcd for C<sub>26</sub>H<sub>26</sub>NO<sub>2</sub><sup>+</sup>[M+H]<sup>+</sup> 384.1958; found 384.1959.

(*E*)-3-Cinnamyl-1,3-dimethylindolin-2-one (**3ab**)

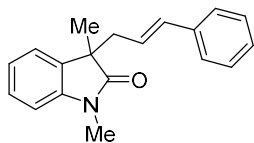

Chemical Formula: C<sub>19</sub>H<sub>19</sub>NO  
Exact Mass: 277.1467

**3ab** was prepared according to general procedure 2.1 using **1a** and **2b** and was purified by silica gel column chromatography (PE/EA = 40/1~5/1) to obtain **3ab** as yellow oil (60% yield). The <sup>1</sup>H NMR data matched those reported in the literature:<sup>1</sup> <sup>1</sup>H NMR (400 MHz, CDCl<sub>3</sub>): δ 7.31-7.14 (m, 7H), 7.11-7.03 (m, 1H), 6.82 (d, *J* = 7.7 Hz, 1H), 6.35 (d, *J* = 15.8 Hz, 1H), 5.95-5.82 (m, 1H), 3.18 (s, 3H), 2.72-2.58 (m, 2H), 1.42 (s, 3H); <sup>13</sup>C NMR (101 MHz, CDCl<sub>3</sub>) δ 180.2, 143.1, 137.2, 133.6, 133.5, 128.4, 127.8, 127.2, 126.1, 124.2, 122.9, 122.4, 108.0, 77.3, 77.0, 76.7, 48.6, 41.6, 26.1, 22.5.

The enantiomeric purity was established by HPLC analysis using a chiral column: AD-H column, 30 °C, *n*-Hexane/*i*-Propanol = 90/10 as eluent, 254 nm, 1 mL/min. t<sub>R</sub> = 8.5 min (minor), 10.2 min (major).

Optical Rotation: [α]<sub>D</sub><sup>33</sup> +4.6 (c 0.2, <sup>t</sup>PrOH) for 83% ee.

<色谱图>

mAU

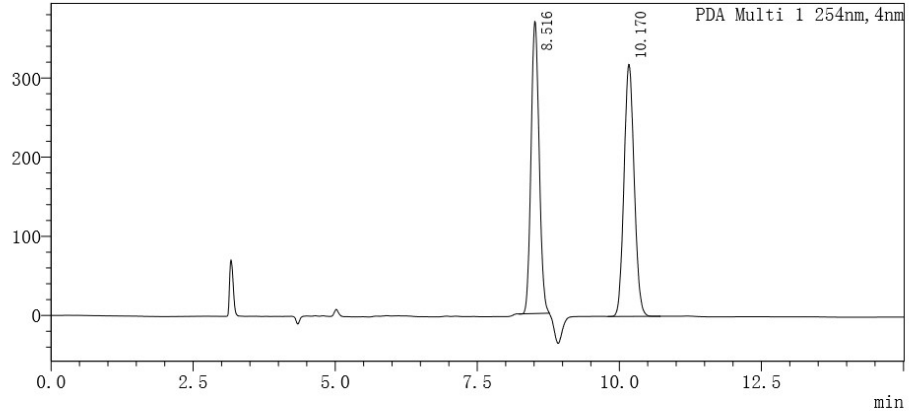

<峰表>

PDA Ch1 254nm

| 峰号 | 保留时间   | 面积      | 高度     | 浓度    | 浓度单位 | 标记 | 化合物名 |
|----|--------|---------|--------|-------|------|----|------|
| 1  | 8.516  | 3671666 | 369354 | 0.000 |      | M  |      |
| 2  | 10.170 | 3975765 | 318585 | 0.000 |      | M  |      |
| 总计 |        | 7647431 | 687939 |       |      |    |      |

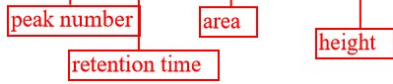

<色谱图>

mAU

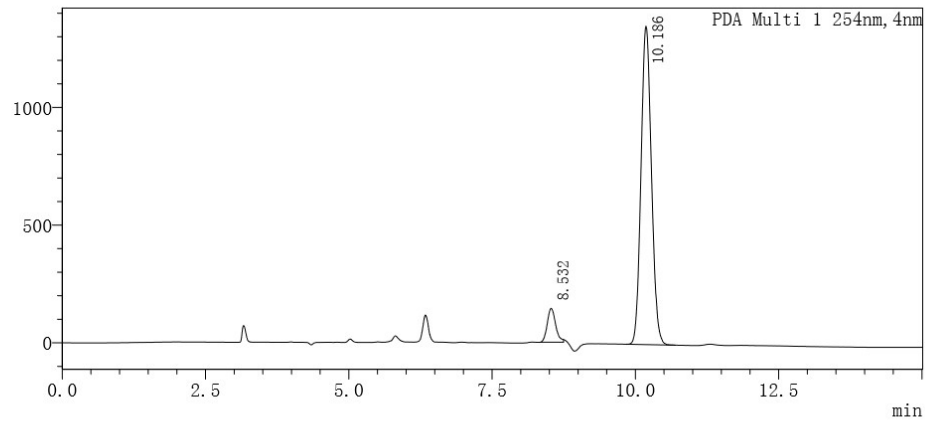

<峰表>

PDA Ch1 254nm

| 峰号 | 保留时间   | 面积       | 高度      | 浓度    | 浓度单位 | 标记 | 化合物名 |
|----|--------|----------|---------|-------|------|----|------|
| 1  | 8.532  | 1446426  | 143771  | 0.000 |      | M  |      |
| 2  | 10.186 | 17057563 | 1353348 | 0.000 |      | M  |      |
| 总计 |        | 18503989 | 1497120 |       |      |    |      |

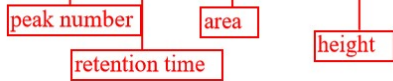

**(E)-1,3-Dimethyl-3-(3-(p-tolyl)allyl)indolin-2-one (3ac)**

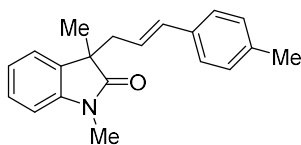

Chemical Formula: C<sub>20</sub>H<sub>21</sub>NO  
Exact Mass: 291.1623

**3ac** was prepared according to general procedure 2.1 using **1a** and **2c** and was purified by silica gel column chromatography (PE/EA = 40/1~5/1) to obtain **3ac** as yellow oil (75% yield). <sup>1</sup>H NMR (400 MHz, CDCl<sub>3</sub>) δ 7.25 (td, *J* = 7.6, 1.3 Hz, 1H), 7.23-7.20 (m, 1H), 7.11-7.02 (m, 5H), 6.81 (d, *J* = 7.7 Hz, 1H), 6.31 (d, *J* = 15.6 Hz, 1H), 5.90-5.75 (m, 1H), 3.17 (s, 3H), 2.69-2.57 (m, 2H), 2.29 (s, 3H), 1.41 (s, 3H); <sup>13</sup>C NMR (101 MHz, CDCl<sub>3</sub>) δ 180.2, 143.1, 136.9, 134.5, 133.5, 129.1, 127.8, 126.0, 123.1, 122.9, 122.3, 107.9, 48.6, 41.6, 26.1, 22.5, 21.1; HRMS: (ESI) calcd for C<sub>20</sub>H<sub>22</sub>NO<sup>+</sup>[M+H]<sup>+</sup> 292.1696; found 292.1703.

**(E)-3-(3-(4-Chlorophenyl)allyl)-1,3-dimethylindolin-2-one (3ad)**

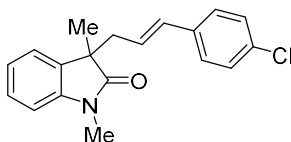

Chemical Formula: C<sub>19</sub>H<sub>18</sub>ClNO  
Exact Mass: 311.1077

**3ad** was prepared according to general procedure 2.1 using **1a** and **2d** and was purified by silica gel column chromatography (PE/EA = 40/1~5/1) to obtain **3ad** as yellow oil (75% yield). <sup>1</sup>H NMR (400 MHz, CDCl<sub>3</sub>): δ 7.27 (td, *J* = 7.7, 1.3 Hz, 1H), 7.24-7.17 (m, 3H), 7.13-7.03 (m, 3H), 6.82 (m, 1H), 6.29 (d, *J* = 15.8 Hz, 1H), 5.90-5.79 (m, 1H), 3.18 (s, 3H), 2.64 (dd, *J* = 7.6, 1.1 Hz, 2H), 1.42 (s, 3H); <sup>13</sup>C NMR (101 MHz, CDCl<sub>3</sub>) δ 180.1, 143.1, 135.7, 133.5, 132.8, 132.5, 128.6, 127.9, 127.3, 125.0, 122.9, 122.5, 108.1, 48.6, 41.6, 26.2, 22.6; HRMS: (ESI) calcd for C<sub>19</sub>H<sub>19</sub>ClNO<sup>+</sup>[M+H]<sup>+</sup> 312.1150; found 312.1149.

**(E)-3-(3-(4-Fluorophenyl)allyl)-1,3-dimethylindolin-2-one (3ae)**



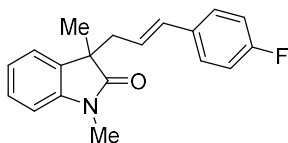

Chemical Formula:  $C_{19}H_{18}FNO$   
Exact Mass: 295.1372

**3ae** was prepared according to general procedure 2.1 using **1a** and **2e** and was purified by silica gel column chromatography (PE/EA = 40/1~5/1) to obtain **3ae** as yellow oil (70% yield).  $^1H$  NMR (400 MHz,  $CDCl_3$ )  $\delta$  7.30-7.25 (m, 1H), 7.24-7.20 (m, 1H), 7.18-7.11 (m, 2H), 7.08 (td,  $J = 7.5, 0.9$  Hz, 1H), 6.97-6.88 (m, 2H), 6.83 (d,  $J = 7.8$  Hz, 1H), 6.30 (d,  $J = 15.8$  Hz, 1H), 5.78 (dt,  $J = 15.4, 7.5$  Hz, 1H), 3.18 (s, 3H), 2.70-2.58 (m, 2H), 1.42 (s, 3H);  $^{13}C$  NMR (101 MHz,  $CDCl_3$ )  $\delta$  180.2, 163.3, 143.1,  $\delta$  133.4 (d,  $J = 3.3$  Hz), 133.4, 132.5, 127.9, 127.6 (d,  $J = 7.9$  Hz), 123.9 (d,  $J = 2.2$  Hz), 122.9, 122.4, 115.3 (d,  $J = 21.5$  Hz), 108.0, 48.7, 41.6, 26.2, 22.6;  $^{19}F$  NMR (377 MHz,  $CDCl_3$ )  $\delta$  -115.06; HRMS: (ESI) calcd for  $C_{19}H_{19}FNO^+[M+H]^+$  296.1145; found 296.1439.

(*E*)-1,3-Dimethyl-3-(3-(4-(trifluoromethyl)phenyl)allyl)indolin-2-one (**3af**)

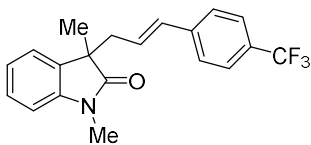

Chemical Formula:  $C_{20}H_{18}F_3NO$   
Exact Mass: 345.1340

**3af** was prepared according to general procedure 2.1 using **1a** and **2f** and was purified by silica gel column chromatography (PE/EA = 40/1~5/1) to obtain **3af** as yellow oil (43% yield).  $^1H$  NMR (400 MHz,  $CDCl_3$ )  $\delta$  7.48 (d,  $J = 8.2$  Hz, 2H), 7.30-7.26 (m, 2H), 7.25 (d,  $J = 2.4$  Hz, 1H), 7.24-7.21 (m, 1H), 7.08 (td,  $J = 7.5, 1.0$  Hz, 1H), 6.83 (d,  $J = 7.7$  Hz, 1H), 6.36 (d,  $J = 14.8$  Hz, 1H), 5.95 (dq,  $J = 15.9, 7.9$  Hz, 1H), 3.18 (s, 3H), 2.72-2.65 (m, 2H), 1.43 (s, 3H);  $^{13}C$  NMR (101 MHz,  $CDCl_3$ )  $\delta$  180.1, 173.8, 158.3, 143.2, 133.4, 132.5, 128.1, 127.2, 126.3, 125.5 (q,  $J = 3.8$  Hz), 123.2, 122.9, 122.6, 108.2, 48.7, 41.7, 26.3, 22.7;  $^{19}F$  NMR (376 MHz,  $CDCl_3$ )  $\delta$  -62.4; HRMS: (ESI) calcd for  $C_{20}H_{19}F_3NO^+[M+H]^+$  346.1413; found 346.1419.

(*E*)-1,3-Dimethyl-3-(3-(4-(methylsulfonyl)phenyl)allyl)indolin-2-one (**3ag**)

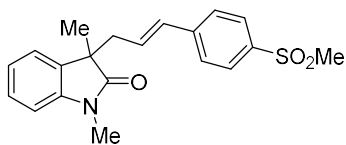

Chemical Formula: C<sub>20</sub>H<sub>21</sub>NO<sub>3</sub>S  
Exact Mass: 355.1242

**3ag** was prepared according to general procedure 2.1 using **1a** and **2g** and was purified by silica gel column chromatography (PE/EA = 40/1~5/1) to obtain **3ag** as yellow oil (41% yield). <sup>1</sup>H NMR (400 MHz, CDCl<sub>3</sub>) δ 7.82-7.76 (m, 2H), 7.36-7.32 (m, 2H), 7.31-7.27 (m, 1H), 7.23 (ddd, *J* = 7.4, 1.3, 0.5 Hz, 1H), 7.09 (td, *J* = 7.5, 1.0 Hz, 1H), 6.84 (d, *J* = 7.6 Hz, 1H), 6.39 (d, *J* = 15.8 Hz, 1H), 6.04 (ddd, *J* = 15.7, 8.0, 7.1 Hz, 1H), 3.18 (s, 3H), 3.02 (s, 3H), 2.75-2.65 (m, 2H), 1.44 (s, 3H); <sup>13</sup>C NMR (101 MHz, CDCl<sub>3</sub>) δ 179.8, 143.0, 142.6, 138.7, 133.2, 131.9, 128.9, 128.1, 127.6, 126.8, 122.8, 122.6, 108.1, 48.5, 44.5, 41.6, 26.2, 22.7; HRMS: (ESI) calcd for C<sub>20</sub>H<sub>22</sub>NO<sub>3</sub>S<sup>+</sup>[M+H]<sup>+</sup> 378.1134; found 378.1126.

(*E*)-1,3-Dimethyl-3-(3-(*m*-tolyl)allyl)indolin-2-one (**3ah**)

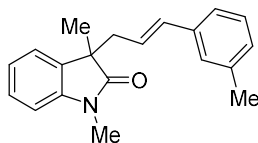

Chemical Formula: C<sub>20</sub>H<sub>21</sub>NO  
Exact Mass: 291.1623

**3ah** was prepared according to general procedure 2.1 using **1a** and **2h** and was purified by silica gel column chromatography (PE/EA = 40/1~5/1) to obtain **3ah** as yellow oil (70% yield). <sup>1</sup>H NMR (400 MHz, CDCl<sub>3</sub>): δ 7.27 (td, *J* = 7.7, 1.2 Hz, 2H), 7.24-7.21 (m, 1H), 7.13 (t, *J* = 7.5 Hz, 1H), 7.07 (td, *J* = 7.5, 0.9 Hz, 1H), 7.04-6.97 (m, 3H), 6.82 (d, *J* = 7.7 Hz, 1H), 6.31 (d, *J* = 15.7 Hz, 1H), 5.95-5.83 (m, 1H), 3.19 (s, 3H), 2.71-2.55 (m, 2H), 2.29 (s, 3H), 1.41 (s, 3H); <sup>13</sup>C NMR (101 MHz, CDCl<sub>3</sub>) δ 180.2, 143.1, 137.9, 137.2, 133.8, 133.6, 128.3, 128.0, 127.8, 126.9, 123.9, 123.2, 122.9, 122.4, 108.0, 77.3, 77.0, 76.7, 48.6, 41.6, 26.2, 22.5, 21.3; HRMS: (ESI) calcd for C<sub>20</sub>H<sub>22</sub>NO<sup>+</sup>[M+H]<sup>+</sup> 292.1696; found 292.1698.

(*E*)-1,3-Dimethyl-3-(3-(*o*-tolyl)allyl)indolin-2-one (**3ai**)

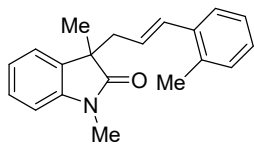

Chemical Formula: C<sub>20</sub>H<sub>21</sub>NO  
Exact Mass: 291.1623

**3ai** was prepared according to general procedure 2.1 using **1a** and **2i** and was purified by silica gel column chromatography (PE/EA = 40/1~5/1) to obtain **3ai** as yellow oil (70% yield). <sup>1</sup>H NMR (400 MHz, CDCl<sub>3</sub>): δ 7.29-7.22 (m, 3H), 7.14 (dd, *J* = 7.3, 2.3 Hz, 1H), 7.10-7.04 (m, 4H), 6.82 (d, *J* = 7.7 Hz, 1H), 6.49 (d, *J* = 15.6 Hz, 1H), 5.70 (dt, *J* = 15.4, 7.6 Hz, 1H), 3.18 (s, 3H), 2.68 (d, *J* = 7.8 Hz, 2H), 2.17 (s, 3H), 1.43 (s, 3H); <sup>13</sup>C NMR (101 MHz, CDCl<sub>3</sub>) δ 180.2, 143.1, 136.6, 135.2, 133.5, 132.0, 130.0, 127.8, 127.1, 125.9, 125.8, 125.7, 122.9, 122.3, 108.0, 48.8, 41.9, 26.1, 22.7, 19.7; HRMS: (ESI) calcd for C<sub>20</sub>H<sub>21</sub>NONa<sup>+</sup>[M+Na]<sup>+</sup> 314.1515; found 314.1511.

(*E*)-1,3-Dimethyl-3-(3-(naphthalen-1-yl)allyl)indolin-2-one (**3aj**)

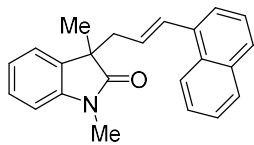

Chemical Formula: C<sub>23</sub>H<sub>21</sub>NO  
Exact Mass: 327.1623

**3aj** was prepared according to general procedure 2.2 using **1a** and **2j** and was purified by silica gel column chromatography (PE/EA = 40/1~5/1) to obtain **3aj** as yellow oil (72% yield). <sup>1</sup>H NMR (400 MHz, CDCl<sub>3</sub>): δ 7.79 (dt, *J* = 3.9, 2.8 Hz, 2H), 7.70 (d, *J* = 8.1 Hz, 1H), 7.47-7.39 (m, 2H), 7.38-7.23 (m, 5H), 7.14-7.07 (m, 1H), 7.00 (d, *J* = 15.5 Hz, 1H), 6.80 (d, *J* = 7.7 Hz, 1H), 5.81 (dt, *J* = 15.3, 7.6 Hz, 1H), 3.17 (s, 3H), 2.88-2.66 (m, 2H), 1.48 (s, 3H); <sup>13</sup>C NMR (101 MHz, CDCl<sub>3</sub>) δ 180.1, 143.2, 135.3, 133.5, 133.3, 131.6, 131.0, 128.3, 127.8, 127.6, 127.5, 125.8, 125.7, 125.5, 124.1, 123.8, 122.9, 122.4, 108.0, 77.3, 77.0, 76.7, 48.9, 42.0, 26.1, 22.7; HRMS: (ESI) calcd for C<sub>23</sub>H<sub>22</sub>NO<sup>+</sup>[M+H]<sup>+</sup> 328.1696; found 328.1696.

The enantiomeric purity was established by HPLC analysis using a chiral column: AD-H column, 30 °C, *n*-Hexane/*i*-Propanol = 90/10 as eluent, 254 nm, 1 mL/min. t<sub>R</sub> = 5.7 min (minor), 6.5 min (major).

Optical Rotation: [α]<sub>D</sub><sup>33</sup> +47.7 (c 0.2, *i*PrOH) for 84% ee.

<色谱图>

mAU

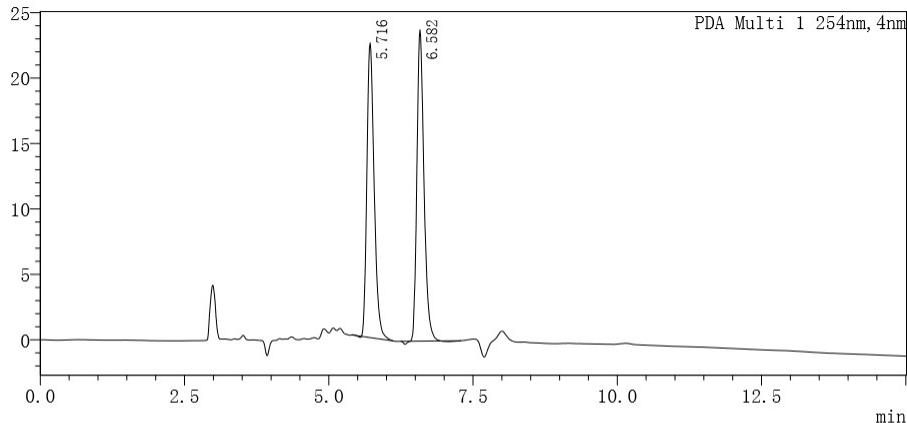

<峰表>

PDA Ch1 254nm

| 峰号 | 保留时间  | 面积     | 高度    | 浓度    | 浓度单位 | 标记 | 化合物名 |
|----|-------|--------|-------|-------|------|----|------|
| 1  | 5.716 | 196535 | 22517 | 0.000 |      | M  |      |
| 2  | 6.582 | 200509 | 23803 | 0.000 |      | M  |      |
| 总计 |       | 397044 | 46320 |       |      |    |      |

peak number

area

height

retention time

<色谱图>

mAU

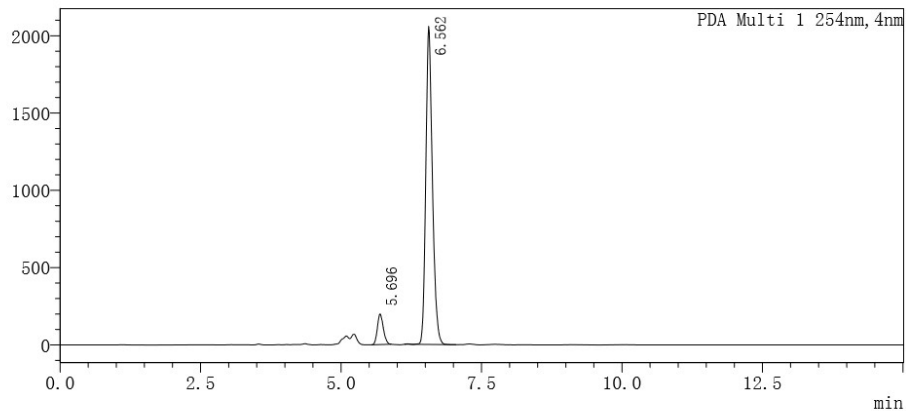

<峰表>

PDA Ch1 254nm

| 峰号 | 保留时间  | 面积       | 高度      | 浓度    | 浓度单位 | 标记 | 化合物名 |
|----|-------|----------|---------|-------|------|----|------|
| 1  | 5.696 | 1457932  | 198580  | 0.000 |      | M  |      |
| 2  | 6.562 | 16728897 | 2058676 | 0.000 |      | M  |      |
| 总计 |       | 18186828 | 2257256 |       |      |    |      |

peak number

area

height

retention time

(*E*)-3-(3-(Benzo[*d*][1,3]dioxol-5-yl)allyl)-1,3-dimethylindolin-2-one (**3ak**)

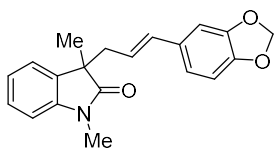

Chemical Formula: C<sub>20</sub>H<sub>19</sub>NO<sub>3</sub>  
Exact Mass: 321.1365

**3ak** was prepared according to general procedure 2.1 using **1a** and **2k** and was purified by silica gel column chromatography (PE/EA = 40/1~5/1) to obtain **3ak** as yellow oil (73% yield). <sup>1</sup>H NMR (400 MHz, CDCl<sub>3</sub>) δ 7.29-7.23 (m, 1H), 7.21 (dd, *J* = 7.4, 1.2 Hz, 1H), 7.07 (td, *J* = 7.5, 1.0 Hz, 1H), 6.82 (d, *J* = 7.7 Hz, 1H), 6.71 (d, *J* = 1.7 Hz, 1H), 6.68 (d, *J* = 8.0 Hz, 1H), 6.63 (dd, *J* = 8.0, 1.7 Hz, 1H), 6.25 (d, *J* = 15.7 Hz, 1H), 5.90 (s, 2H), 5.69 (dt, *J* = 15.4, 7.5 Hz, 1H), 3.18 (s, 3H), 2.68-2.55 (m, 2H), 1.40 (s, 3H); <sup>13</sup>C NMR (101 MHz, CDCl<sub>3</sub>) δ 180.3, 147.9, 146.9, 143.2, 133.7, 133.3, 131.8, 127.9, 123.0, 122.5, 120.8, 108.2, 108.1, 105.5, 101.0, 48.8, 41.7, 26.2, 22.6; HRMS: (ESI) calcd for C<sub>20</sub>H<sub>20</sub>NO<sub>3</sub><sup>+</sup>[M+H]<sup>+</sup> 322.1438; found 322.1443.

(*E*)-3-(3-(9-Ethyl-9*H*-carbazol-2-yl)allyl)-1,3-dimethylindolin-2-one (**3al**)

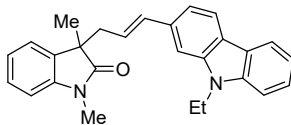

Chemical Formula: C<sub>27</sub>H<sub>26</sub>N<sub>2</sub>O  
Exact Mass: 394.2045

**3al** was prepared according to general procedure 2.1 using **1a** and **2l** and was purified by silica gel column chromatography (PE/EA = 40/1~5/1) to obtain **3al** as yellow oil (64% yield). <sup>1</sup>H NMR (400 MHz, CDCl<sub>3</sub>) δ 8.04 (dd, *J* = 6.8, 0.8 Hz, 1H), 7.91 (d, *J* = 1.5 Hz, 1H), 7.44 (ddd, *J* = 8.2, 7.1, 1.2 Hz, 1H), 7.38-7.33 (m, 2H), 7.29-7.24 (m, 3H), 7.20 (ddd, *J* = 8.0, 7.2, 1.0 Hz, 1H), 7.12-7.05 (m, 1H), 6.84-6.79 (m, 1H), 6.52 (d, *J* = 15.7 Hz, 1H), 5.91 (ddd, *J* = 15.5, 8.0, 7.1 Hz, 1H), 4.32 (q, *J* = 7.2 Hz, 2H), 3.19 (s, 3H), 2.78-2.56 (m, 2H), 1.45 (s, 3H), 1.39 (t, *J* = 7.2 Hz, 3H); <sup>13</sup>C NMR (101 MHz, CDCl<sub>3</sub>) δ 211.8, 174.6, 171.6, 170.8, 165.8, 165.2, 159.9, 159.1, 157.1, 155.5, 154.4, 154.4, 154.3, 153.7, 152.6, 151.8, 150.2, 149.6, 139.9, 139.7, 139.4, 80.2, 73.2, 68.9, 57.6, 53.8, 45.2; HRMS: (ESI) calcd for C<sub>27</sub>H<sub>26</sub>N<sub>2</sub>ONa<sup>+</sup>[M+Na]<sup>+</sup> 417.1937; found 417.1929.

3-(2-(1*H*-Inden-2-yl)ethyl)-1,3-dimethylindolin-2-one (**3am**)

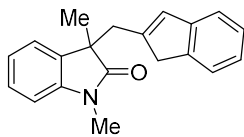

Chemical Formula: C<sub>20</sub>H<sub>19</sub>NO  
Exact Mass: 289.1467

**3am** was prepared according to general procedure 2.1 using **1a** and **2m** and was purified by silica gel column chromatography (PE/EA = 40/1~5/1) to obtain **3am** as yellow oil (70% yield). <sup>1</sup>H NMR (400 MHz, CDCl<sub>3</sub>): δ 7.28-7.18 (m, 3H), 7.18-7.11 (m, 2H), 7.08 (td, *J* = 7.7, 0.9 Hz, 1H), 7.05-7.00 (m, 1H), 6.73 (d, *J* = 7.7 Hz, 1H), 6.32 (d, *J* = 0.7 Hz, 1H), 3.15 (d, *J* = 13.9 Hz, 1H), 3.11 (s, 3H), 2.95 (dd, *J* = 18.1, 15.1 Hz, 2H), 2.74 (d, *J* = 22.8 Hz, 1H), 1.47 (s, 3H); <sup>13</sup>C NMR (101 MHz, CDCl<sub>3</sub>) δ 180.1, 144.8, 144.4, 143.3, 143.1, 133.6, 129.8, 127.9, 125.9, 123.8, 123.2, 122.7, 122.4, 120.2, 108.1, 49.3, 42.0, 39.5, 26.1, 24.2; HRMS: (ESI) calcd for C<sub>20</sub>H<sub>20</sub>NO<sup>+</sup>[M+H]<sup>+</sup> 290.1539; found 290.1546.

1,3-Dimethyl-3-((2*E*,4*E*)-5-phenylpenta-2,4-dien-1-yl)indolin-2-one (**3an**)

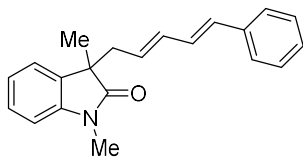

Chemical Formula: C<sub>22</sub>H<sub>21</sub>NO  
Exact Mass: 303.1623

**3an** was prepared according to general procedure 2.1 using **1a** and **2n** and was purified by silica gel column chromatography (PE/EA = 40/1~5/1) to obtain **3an** as yellow oil (90% yield). <sup>1</sup>H NMR (400 MHz, CDCl<sub>3</sub>) δ 7.34-7.30 (m, 2H), 7.30-7.24 (m, 3H), 7.23-7.15 (m, 2H), 7.07 (td, *J* = 7.5, 1.0 Hz, 1H), 6.83 (d, *J* = 7.8 Hz, 1H), 6.64-6.52 (m, 1H), 6.39 (d, *J* = 15.7 Hz, 1H), 6.16 (ddd, *J* = 15.0, 10.4, 0.5 Hz, 1H), 5.46 (dt, *J* = 15.2, 7.6 Hz, 1H), 3.19 (s, 3H), 2.59 (d, *J* = 7.7 Hz, 2H), 1.39 (s, 3H); <sup>13</sup>C NMR (101 MHz, CDCl<sub>3</sub>) δ 180.3, 143.2, 137.4, 134.3, 133.7, 131.4, 128.7, 128.6, 128.6, 127.9, 127.4, 126.3, 123.0, 122.5, 108.1, 48.7, 41.6, 26.3, 22.7; HRMS: (ESI) calcd for C<sub>21</sub>H<sub>22</sub>NO<sup>+</sup>[M+H]<sup>+</sup> 304.1696; found 304.1689.

(*E*)-3-(3-(4-chlorophenyl)allyl)-1,3,5-trimethylindolin-2-one (**3bd**)

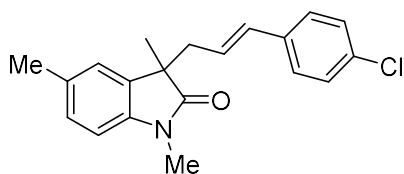

Chemical Formula: C<sub>20</sub>H<sub>20</sub>ClNO

Exact Mass: 325.1233

**3bd** was prepared according to general procedure 2.2 using **1b** and **2d** and was purified by silica gel column chromatography (PE/EA = 40/1~5/1) to obtain **3bd** as yellow oil (66% yield). <sup>1</sup>H NMR (400 MHz, CDCl<sub>3</sub>) δ 7.24-7.16 (m, 2H), 7.13-7.08 (m, 2H), 7.08-7.04 (m, 1H), 7.04-7.00 (m, 1H), 6.71 (d, *J* = 7.8 Hz, 1H), 6.30 (d, *J* = 15.7 Hz, 1H), 5.97-5.74 (m, 1H), 3.15 (s, 3H), 2.63 (dt, *J* = 7.1, 1.2 Hz, 2H), 2.35 (s, 3H), 1.39 (s, 3H); <sup>13</sup>C NMR (101 MHz, CDCl<sub>3</sub>) δ 180.0, 140.7, 135.7, 133.5, 132.7, 132.3, 131.9, 128.5, 128.1, 127.3, 125.1, 123.7, 107.7, 48.7, 41.7, 26.2, 22.6, 21.2; HRMS: (ESI) calcd for C<sub>20</sub>H<sub>20</sub>ClNONa<sup>+</sup>[M+Na]<sup>+</sup> 348.1126; found 348.1116.

The enantiomeric purity was established by HPLC analysis using a chiral column: AD-H column, 30 °C, *n*-Hexane/*i*-Propanol = 90/10 as eluent, 254 nm, 1 mL/min. t<sub>R</sub> = 5.1 min (minor), 5.6 min (major).

Optical Rotation: [α]<sub>D</sub><sup>33</sup> +51.4 (c 0.5, <sup>t</sup>PrOH) for 77% ee.



<色谱图>

mAU

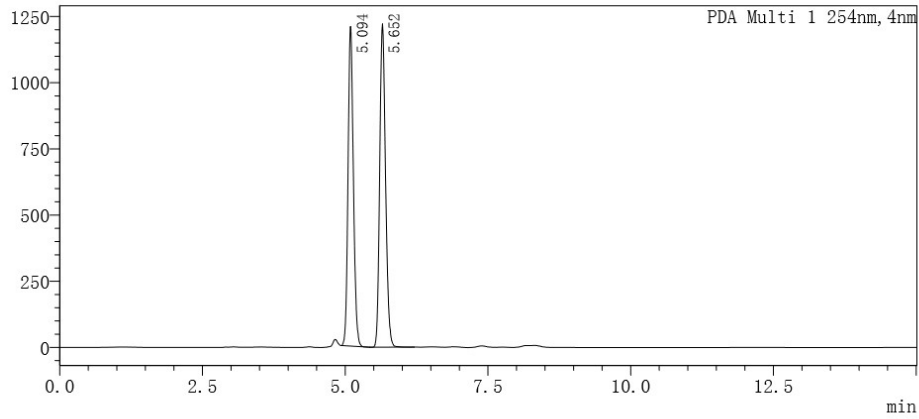

<峰表>

PDA Ch1 254nm

| 峰号 | 保留时间  | 面积       | 高度      | 浓度    | 浓度单位 | 标记 | 化合物名 |
|----|-------|----------|---------|-------|------|----|------|
| 1  | 5.094 | 7807822  | 1206229 | 0.000 |      | M  |      |
| 2  | 5.652 | 8671609  | 1222243 | 0.000 |      | M  |      |
| 总计 |       | 16479431 | 2428472 |       |      |    |      |

peak number

retention time

area

height

<色谱图>

mAU

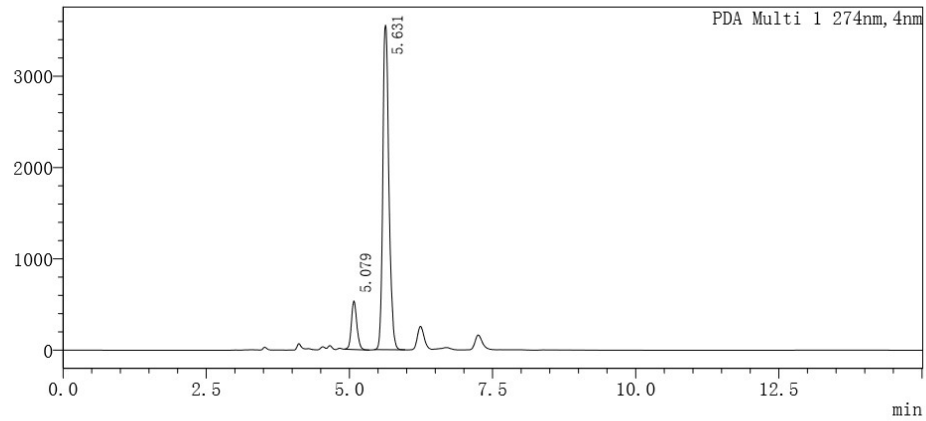

<峰表>

PDA Ch1 274nm

| 峰号 | 保留时间  | 面积       | 高度      | 浓度     | 浓度单位 | 标记 | 化合物名 |
|----|-------|----------|---------|--------|------|----|------|
| 1  | 5.079 | 3516280  | 533018  | 11.747 |      | M  |      |
| 2  | 5.631 | 26416868 | 3556478 | 88.253 |      | M  |      |
| 总计 |       | 29933148 | 4089497 |        |      |    |      |

peak number

retention time

area

height

(*E*)-3-(3-(benzo[d][1,3]dioxol-5-yl)allyl)-1,3,5-trimethylindolin-2-one (**3bk**)

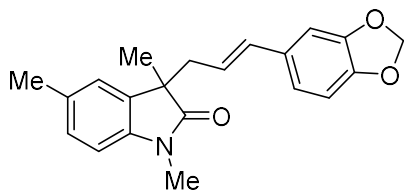

Chemical Formula: C<sub>21</sub>H<sub>21</sub>NO<sub>3</sub>

Exact Mass: 335.1521

**3bk** was prepared according to general procedure 2.2 using **1b** and **2k** and was purified by silica gel column chromatography (PE/EA = 40/1~5/1) to obtain **3bk** as yellow oil (75% yield). <sup>1</sup>H NMR (400 MHz, CDCl<sub>3</sub>) δ 7.09-7.02 (m, 2H), 6.73-6.66 (m, 3H), 6.66-6.60 (m, 1H), 6.26 (d, *J* = 15.5 Hz, 1H), 5.90 (s, 2H), 5.74-5.62 (m, 1H), 3.15 (s, 3H), 2.60 (d, *J* = 7.5 Hz, 2H), 2.36 (s, 3H), 1.39 (s, 3H); <sup>13</sup>C NMR (101 MHz, CDCl<sub>3</sub>) δ 180.2, 147.8, 146.8, 140.8, 133.7, 133.1, 131.9, 128.0, 123.7, 122.6, 120.7, 108.1, 107.7, 105.5, 100.9, 48.7, 41.6, 26.2, 22.6, 21.2; HRMS: (ESI) calcd for C<sub>21</sub>H<sub>21</sub>NO<sub>3</sub>Na<sup>+</sup>[M+Na]<sup>+</sup> 358.1414; found 358.1390.

The enantiomeric purity was established by HPLC analysis using a chiral column: AD-H column, 30 °C, *n*-Hexane/*i*-Propanol = 80/20 as eluent, 254 nm, 1 mL/min. t<sub>R</sub> = 5.1 min (minor), 5.9 min (major).

Optical Rotation: [α]<sub>D</sub><sup>31</sup> +11.4 (c 0.1, *i*PrOH) for 81% ee.

<色谱图>

mAU

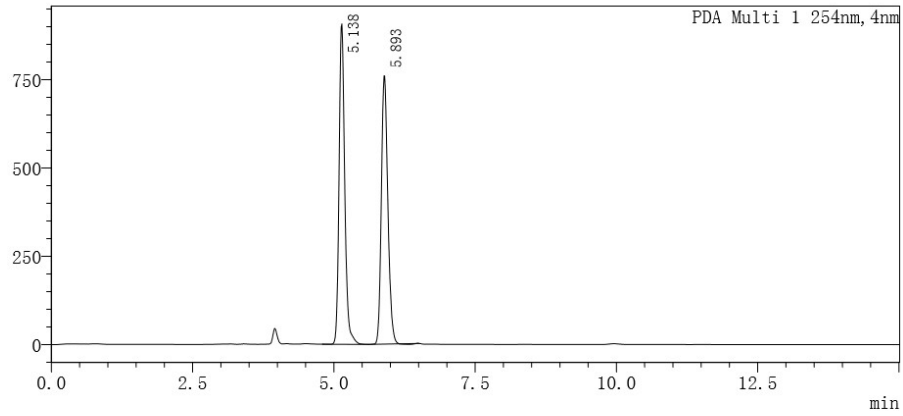

<峰表>

PDA Ch1 254nm

| 峰号 | 保留时间  | 面积       | 高度      | 浓度    | 浓度单位 | 标记 | 化合物名 |
|----|-------|----------|---------|-------|------|----|------|
| 1  | 5.138 | 6339024  | 907229  | 0.000 |      | M  |      |
| 2  | 5.893 | 6035640  | 759778  | 0.000 |      | M  |      |
| 总计 |       | 12374664 | 1667006 |       |      |    |      |

peak number

retention time

area

height

<色谱图>

mAU

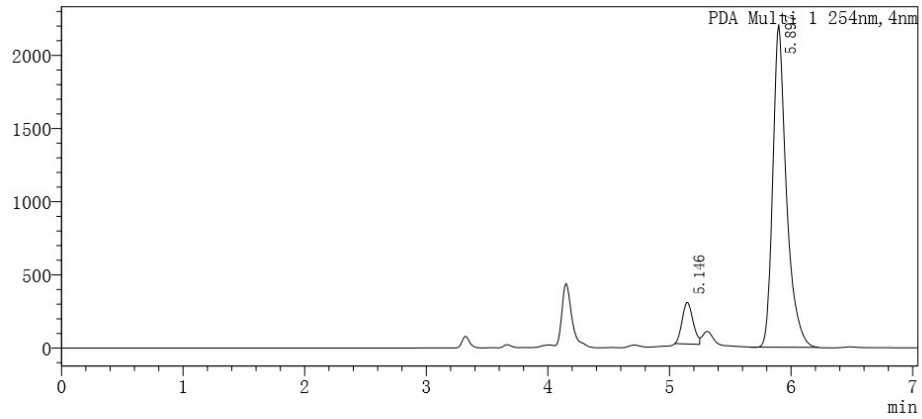

<峰表>

PDA Ch1 254nm

| 峰号 | 保留时间  | 面积       | 高度      | 浓度    | 浓度单位 | 标记 | 化合物名 |
|----|-------|----------|---------|-------|------|----|------|
| 1  | 5.146 | 1778907  | 284348  | 0.000 |      | M  |      |
| 2  | 5.897 | 17109412 | 2204867 | 0.000 |      | M  |      |
| 总计 |       | 18888319 | 2489215 |       |      |    |      |

peak number

retention time

area

height

3-((1*H*-inden-2-yl)methyl)-1,3,5-trimethylindolin-2-one (**2bm**)

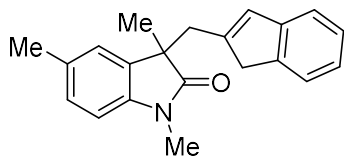

Chemical Formula: C<sub>21</sub>H<sub>21</sub>NO

Exact Mass: 303.1623

**3bm** was prepared according to general procedure 2.2 using **1b** and **2m** and was purified by silica gel column chromatography (PE/EA = 40/1~5/1) to obtain **3bm** as yellow oil (62% yield). <sup>1</sup>H NMR (400 MHz, CDCl<sub>3</sub>) δ 7.24-7.20 (m, 1H), 7.19-7.11 (m, 2H), 7.08-7.06 (m, 1H), 7.06-7.00 (m, 2H), 6.62 (d, *J* = 7.9 Hz, 1H), 6.31 (s, 1H), 3.14 (d, *J* = 13.1 Hz, 1H), 3.09 (s, 3H), 2.97 (d, *J* = 22.1 Hz, 1H), 2.90 (d, *J* = 14.5 Hz, 1H), 2.76 (d, *J* = 22.1 Hz, 1H), 2.37 (s, 3H), 1.45 (s, 3H); <sup>13</sup>C NMR (101 MHz, CDCl<sub>3</sub>) δ 180.1, 144.9, 144.6, 143.4, 140.8, 133.7, 131.9, 129.6, 128.2, 125.0, 123.8, 123.5, 123.2, 120.2, 107.8, 49.3, 42.0, 39.6, 26.2, 24.4, 21.2; HRMS: (ESI) calcd for C<sub>21</sub>H<sub>22</sub>NO<sup>+</sup>[M+H]<sup>+</sup> 304.1696; found 304.1688.

The enantiomeric purity was established by HPLC analysis using a chiral column: AD-H column, 30 °C, *n*-Hexane/*i*-Propanol = 90/10 as eluent, 254 nm, 1 mL/min. t<sub>R</sub> = 4.9 min (minor), 5.6 min (major).

Optical Rotation: [α]<sub>D</sub><sup>33</sup> +56.2 (c 0.2, *i*PrOH) for 73% ee.

<色谱图>

mAU

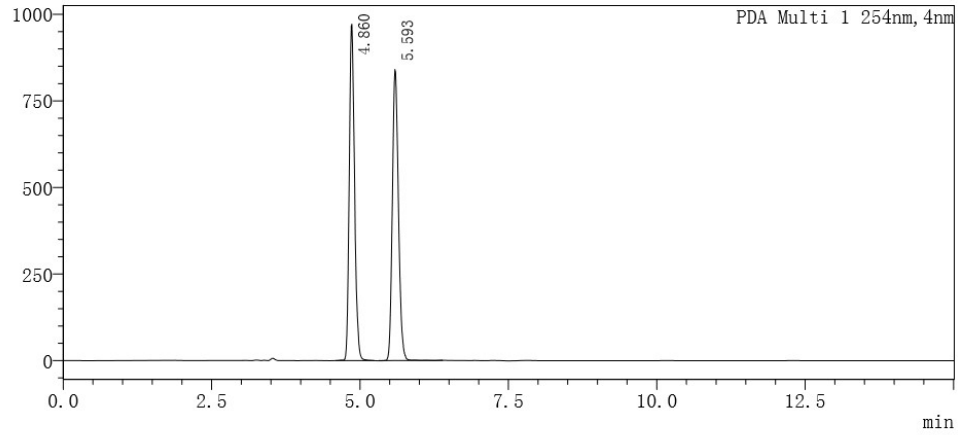

<峰表>

PDA Ch1 254nm

| 峰号 | 保留时间  | 面积       | 高度      | 浓度    | 浓度单位 | 标记 | 化合物名 |
|----|-------|----------|---------|-------|------|----|------|
| 1  | 4.860 | 6008217  | 971803  | 0.000 |      | M  |      |
| 2  | 5.593 | 5969741  | 841042  | 0.000 |      | M  |      |
| 总计 |       | 11977958 | 1812845 |       |      |    |      |

peak number

area

height

retention time

<色谱图>

mAU

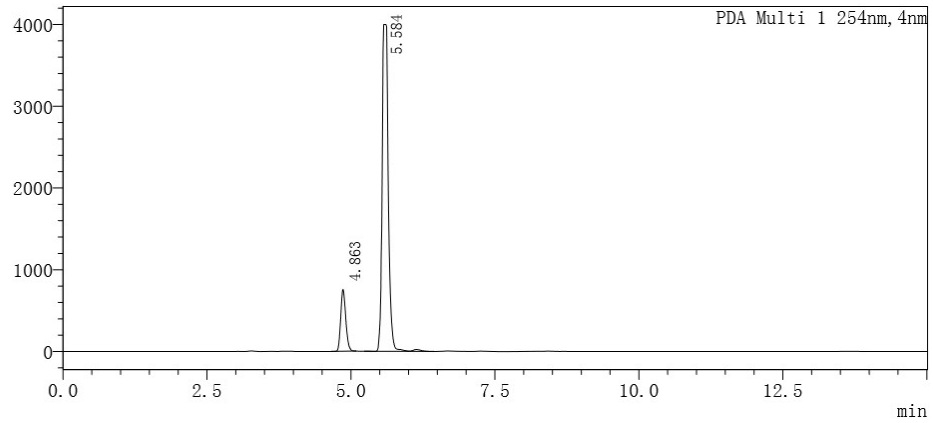

<峰表>

PDA Ch1 254nm

| 峰号 | 保留时间  | 面积       | 高度      | 浓度    | 浓度单位 | 标记 | 化合物名 |
|----|-------|----------|---------|-------|------|----|------|
| 1  | 4.863 | 4587032  | 759227  | 0.000 |      | M  |      |
| 2  | 5.584 | 29777410 | 3997483 | 0.000 |      | M  |      |
| 总计 |       | 34364442 | 4756710 |       |      |    |      |

peak number

area

height

retention time

**(E)-3-(3-(4-methoxyphenyl)allyl)-1,3,4-trimethylindolin-2-one (3qa)**

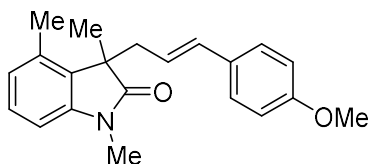

Chemical Formula:  $C_{21}H_{23}NO_2$

Exact Mass: 321.1729

$^1H$  NMR (400 MHz,  $CDCl_3$ )  $\delta$  7.15 (t,  $J = 7.8$  Hz, 1H), 7.06-6.98 (m, 2H), 6.84 (d,  $J = 7.7$  Hz, 1H), 6.76-6.69 (m, 2H), 6.67-6.61 (m, 1H), 6.26 (d,  $J = 15.6$  Hz, 1H), 5.53-5.40 (m, 1H), 3.74 (s, 3H), 3.14 (s, 3H), 2.90-2.74 (m, 2H), 2.44 (s, 3H), 1.50 (s, 3H);  $^{13}C$  NMR (101 MHz,  $CDCl_3$ )  $\delta$  180.1, 158.8, 143.5, 134.0, 132.1, 130.2, 130.1, 127.6, 127.2, 125.0, 122.3, 113.7, 105.7, 55.2, 50.0, 39.7, 26.2, 21.5, 18.4; HRMS: (ESI) calcd for  $C_{21}H_{23}NO_2H^+$   $[M+H]^+$  322.1802; found 322.1797.

The enantiomeric purity was established by HPLC analysis using a chiral column: AD-H column, 30 °C, *n*-Hexane/*i*-Propanol = 90/10 as eluent, 254 nm, 1 mL/min.  $t_R = 8.2$  min (minor), 9.2 min (major).

<色谱图>

mAU

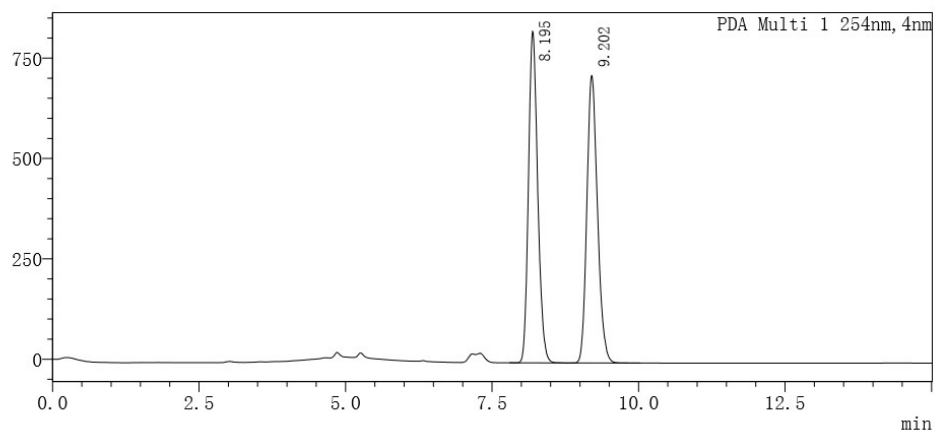

<峰表>

PDA Ch1 254nm

| 峰号 | 保留时间  | 面积       | 高度      | 浓度    | 浓度单位 | 标记 | 化合物名 |
|----|-------|----------|---------|-------|------|----|------|
| 1  | 8.195 | 9045045  | 826938  | 0.000 |      | M  |      |
| 2  | 9.202 | 9026436  | 716594  | 0.000 |      | M  |      |
| 总计 |       | 18071481 | 1543531 |       |      |    |      |

peak number

area

height

retention time

<色谱图>

mAU

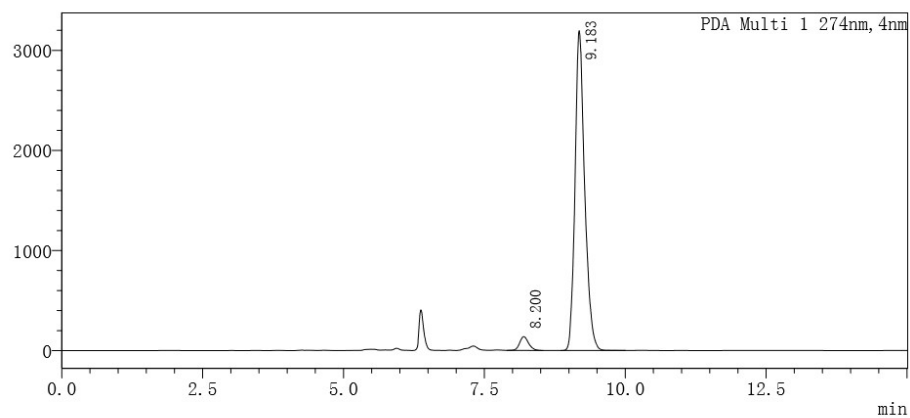

<峰表>

PDA Ch1 274nm

| 峰号 | 保留时间  | 面积       | 高度      | 浓度    | 浓度单位 | 标记 | 化合物名 |
|----|-------|----------|---------|-------|------|----|------|
| 1  | 8.200 | 1518990  | 138972  | 0.000 |      | M  |      |
| 2  | 9.183 | 38063939 | 3196894 | 0.000 |      | M  |      |
| 总计 |       | 39582928 | 3335866 |       |      |    |      |

peak number

area

height

retention time

## 5. Synthetic Applications<sup>2</sup>

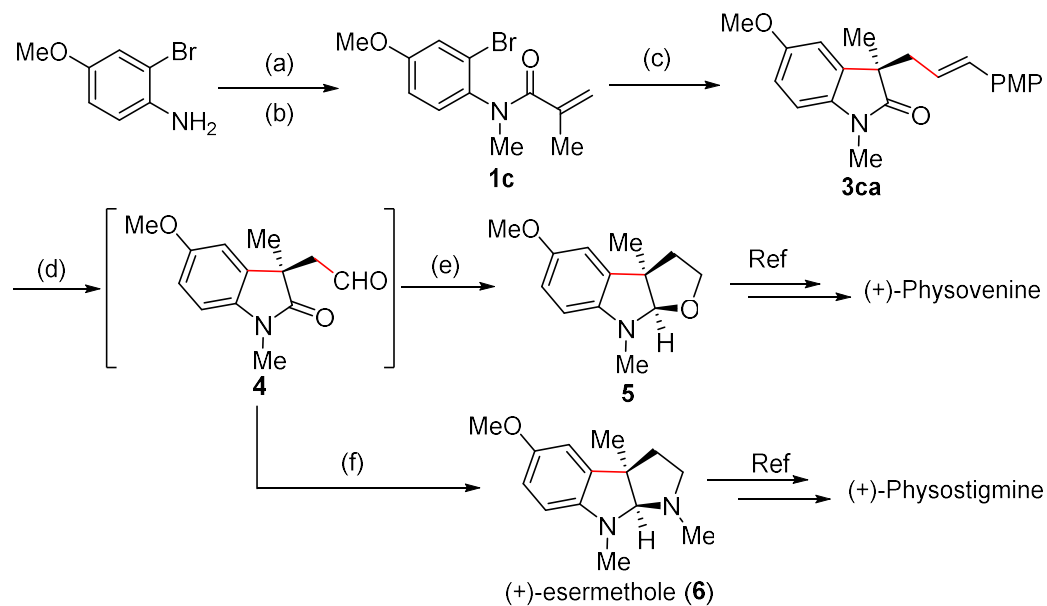

**Scheme S1.** Formal total synthesis of (+)-physovene and (+)-physostigmine.

**Procedure for the synthesis of the aldehyde intermediate 4:** To a solution of **3ca** (100 mg, 0.3 mmol) in  $\text{CH}_2\text{Cl}_2/\text{MeOH}$  (3 mL/3 mL),  $\text{O}_3$  was bubbled at  $-78^\circ\text{C}$  until the reaction was complete (monitored by TLC). Argon was bubbled into the solution for 5 min to remove the excess  $\text{O}_3$ .  $\text{PPh}_3$  was added at  $-78^\circ\text{C}$  and the mixture was kept stirring for another hour. The reaction mixture was passed through a short pad of silica gel, and eluted with EtOAc. The filtrate was concentrated and the residue was purified by flash column chromatography on silica gel (PE/ethyl acetate = 5/1 to 2/1) to afford the aldehyde intermediate **4** as a white solid (42.1 mg, 60% yield).

**Procedure for the synthesis of 5:** To a solution of  $\text{LiAlH}_4$  (260  $\mu\text{L}$ , 0.65 mmol, 2.5 mol/L in THF) in dry THF (3 mL), the aldehyde intermediate **4** (15.1 mg, 0.065 mmol) was added under Ar, the mixture was stirred at room temperature for 40 min. The reaction was quenched by EtOAc and saturated aqueous  $\text{NaHCO}_3$  successively. The phases were separated, the aqueous layer was extracted with EtOAc, and the combined organic extracts were dried with  $\text{Na}_2\text{SO}_4$  and concentrated. The residue was



purified by silica gel column chromatography (PE/acetone/ $\text{NEt}_3 = 10/1/0.1$ ) to afford **5** as a pale yellow oil (13.0 mg, 91%).  $^1\text{H NMR}$  (400 MHz,  $\text{CDCl}_3$ )  $\delta$  6.74-6.62 (m, 2H), 6.29 (d,  $J = 8.3$  Hz, 1H), 5.03 (s, 1H), 4.03-3.86 (m, 1H), 3.75 (s, 3H), 3.47 (ddd,  $J = 10.9, 8.6, 5.4$  Hz, 1H), 2.88 (s, 3H), 2.13 (ddd,  $J = 11.8, 5.3, 1.5$  Hz, 1H), 2.09-1.99 (m, 1H), 1.45 (s, 3H);  $[\alpha]_{\text{D}}^{30} +24$  (c 0.25, EtOH), literature value  $[\alpha]_{\text{D}}^{22} -81.2$  (c 0.6, EtOH) for the opposite enantiomer.<sup>3</sup>

**Procedure for the synthesis of 6:** To a solution of the aldehyde intermediate **4** (15.1 mg, 0.065 mmol) and TEA (90  $\mu\text{L}$ , 0.65 mmol) in anhydrous THF (3 mL),  $\text{MeNH}_2\cdot\text{HCl}$  (43.9 mg, 0.65 mmol) and  $\text{MgSO}_4$  (50 mg) was added under Ar, the mixture was stirred at room temperature for 16 h. Then  $\text{LiAlH}_4$  (260  $\mu\text{L}$ , 0.65 mmol, 2.5 mol/L in THF) was added and the mixture was refluxed at 80 °C for 1.5 h. The reaction was quenched by EtOAc and saturated aqueous  $\text{NaHCO}_3$  successively. The phases were separated, the aqueous layer was extracted with EtOAc, and the combined organic extracts were dried with  $\text{Na}_2\text{SO}_4$  and concentrated. The residue was purified by silica gel column chromatography (PE/acetone/ $\text{NEt}_3 = 8/1/0.1$ ) to afford **6** as a pale yellow oil (12.8 mg, 86%).  $^1\text{H NMR}$  (400 MHz,  $\text{CDCl}_3$ )  $\delta$  6.65 (dt,  $J = 4.0, 2.4$  Hz, 2H), 6.36 (d,  $J = 8.2$  Hz, 1H), 4.05 (s, 1H), 3.75 (s, 3H), 2.89 (s, 3H), 2.73 (dt,  $J = 9.5, 5.4$  Hz, 1H), 2.68-2.60 (m, 1H), 2.54 (s, 3H), 1.95 (dd,  $J = 7.4, 5.4$  Hz, 2H), 1.43 (s, 3H);  $[\alpha]_{\text{D}}^{30} +62$  (c 0.2, MeOH), literature value  $[\alpha]_{\text{D}}^{22} -98$  (c 1.0, MeOH) for the opposite enantiomer.<sup>3</sup>

## 6. Copies of the $^1\text{H}$ , $^{19}\text{F}$ and $^{13}\text{C}$ NMR spectra

### 3aa

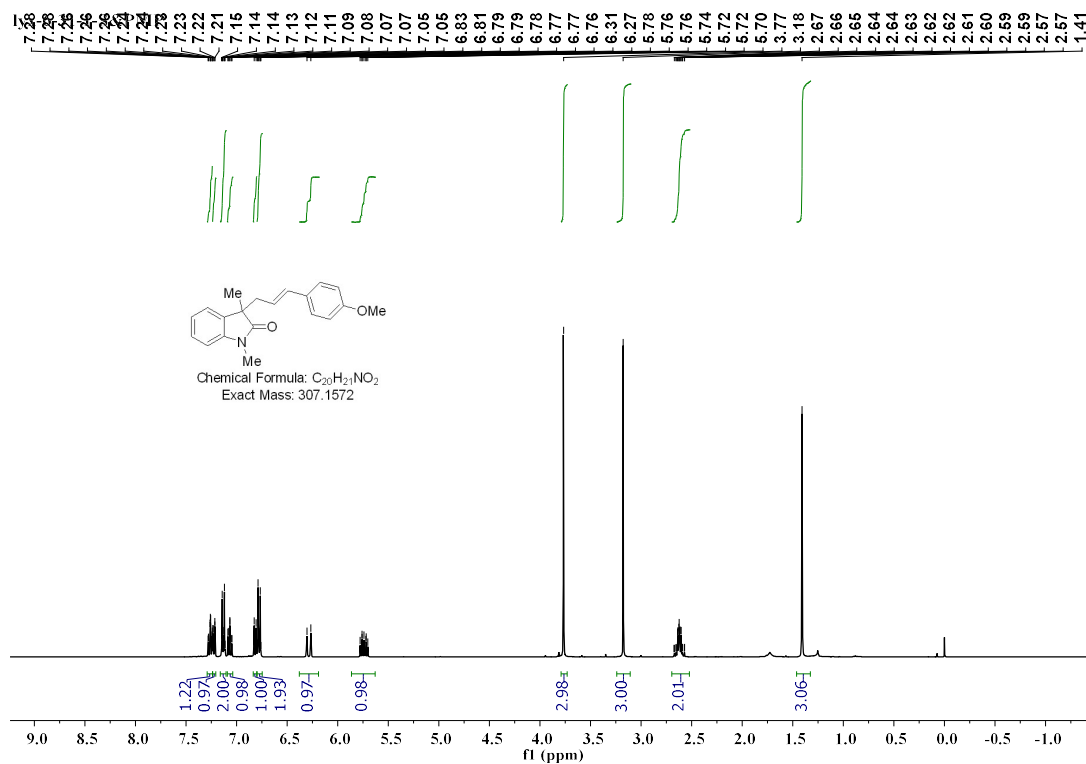

### lyx-6-31-1-S&PMP

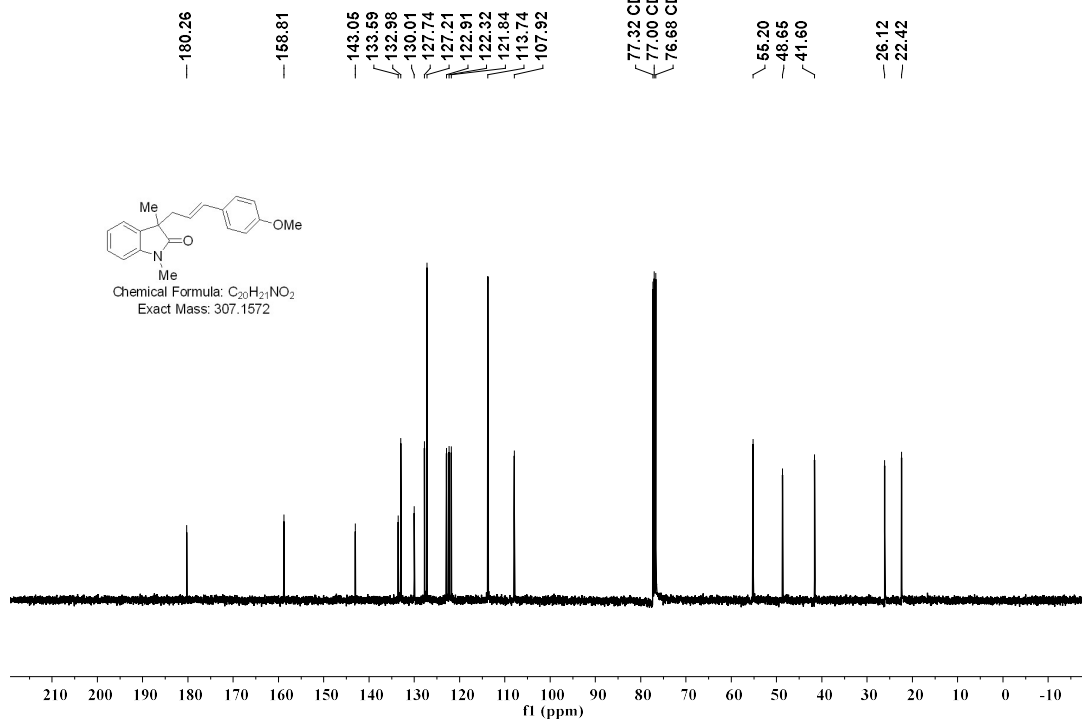

**3ba**

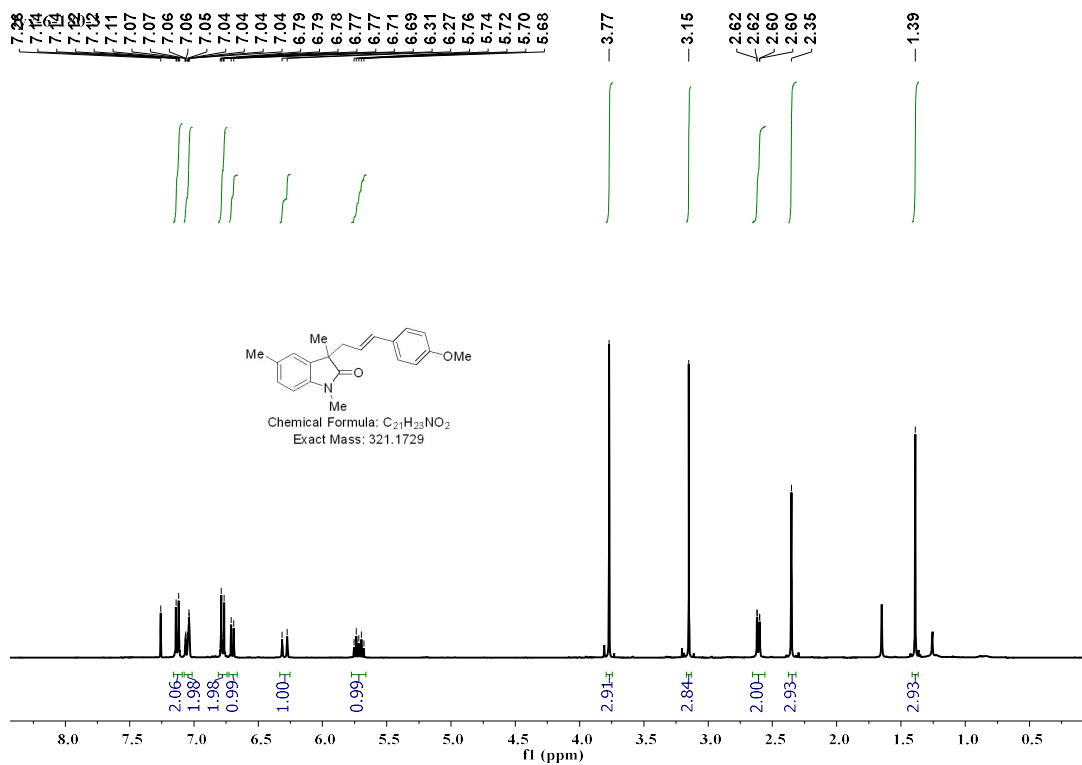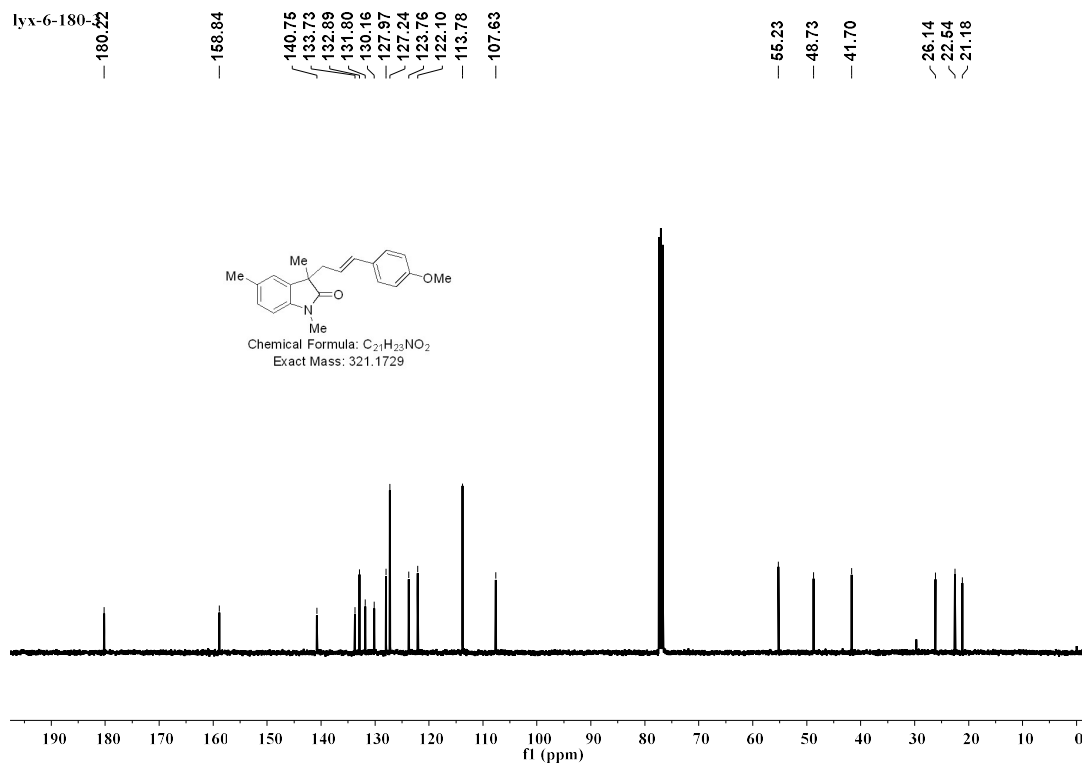

### 3ca

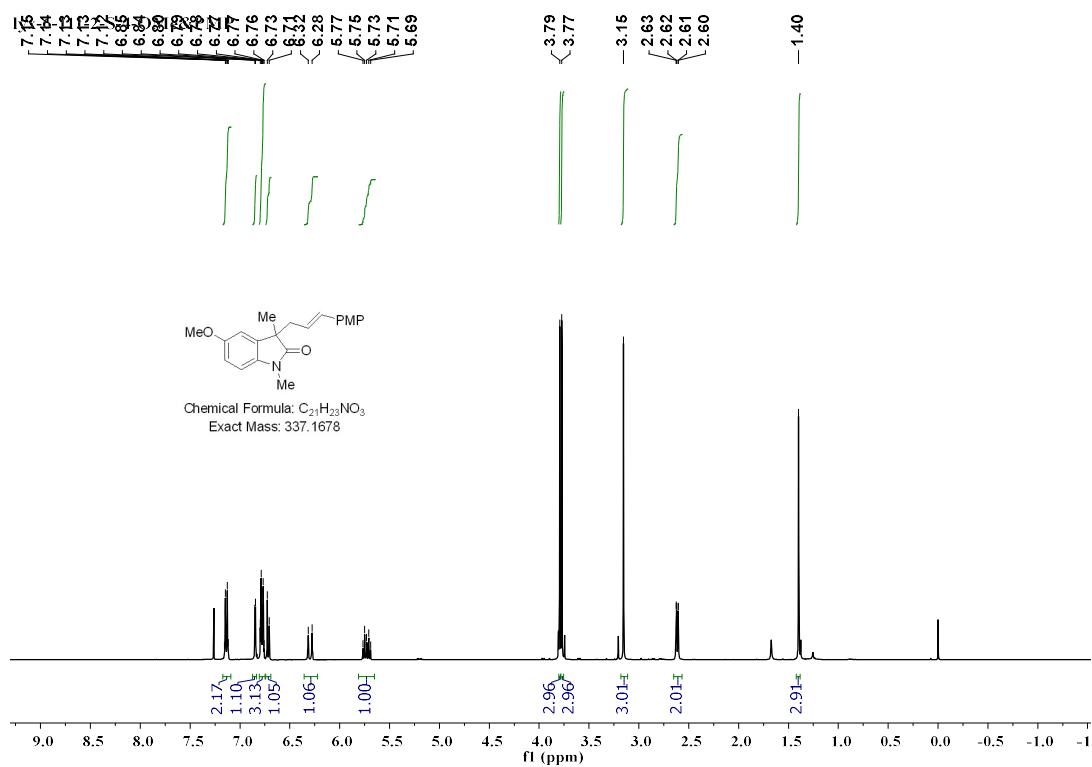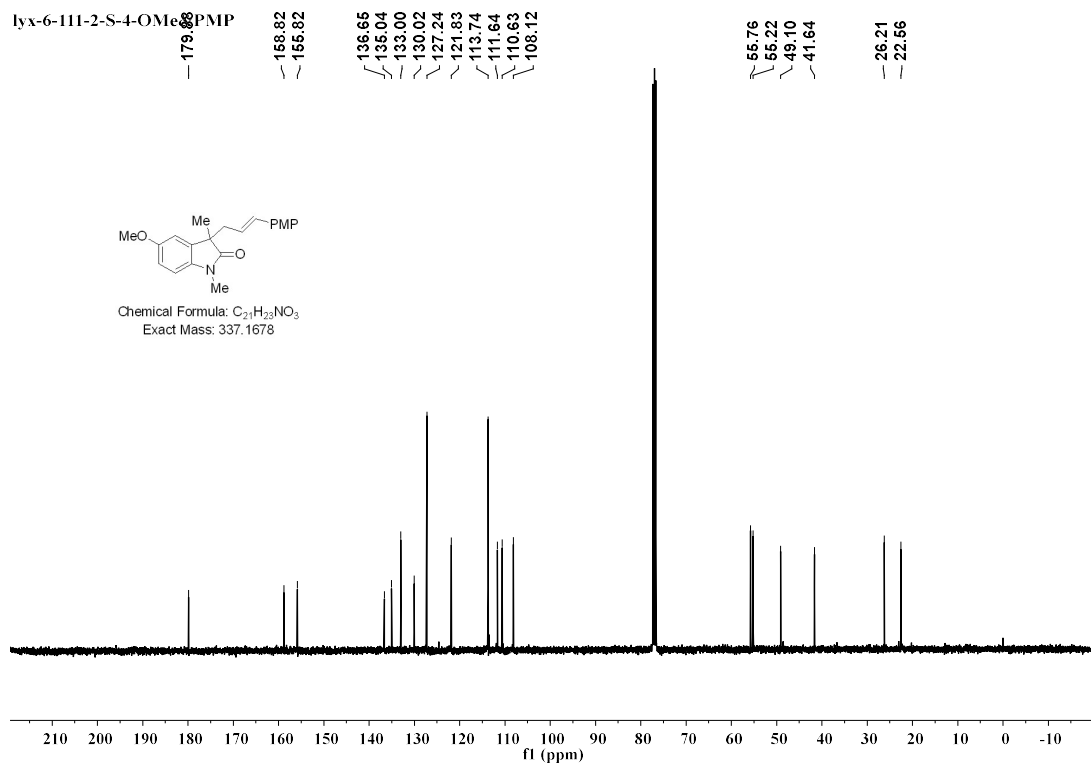

**3da**

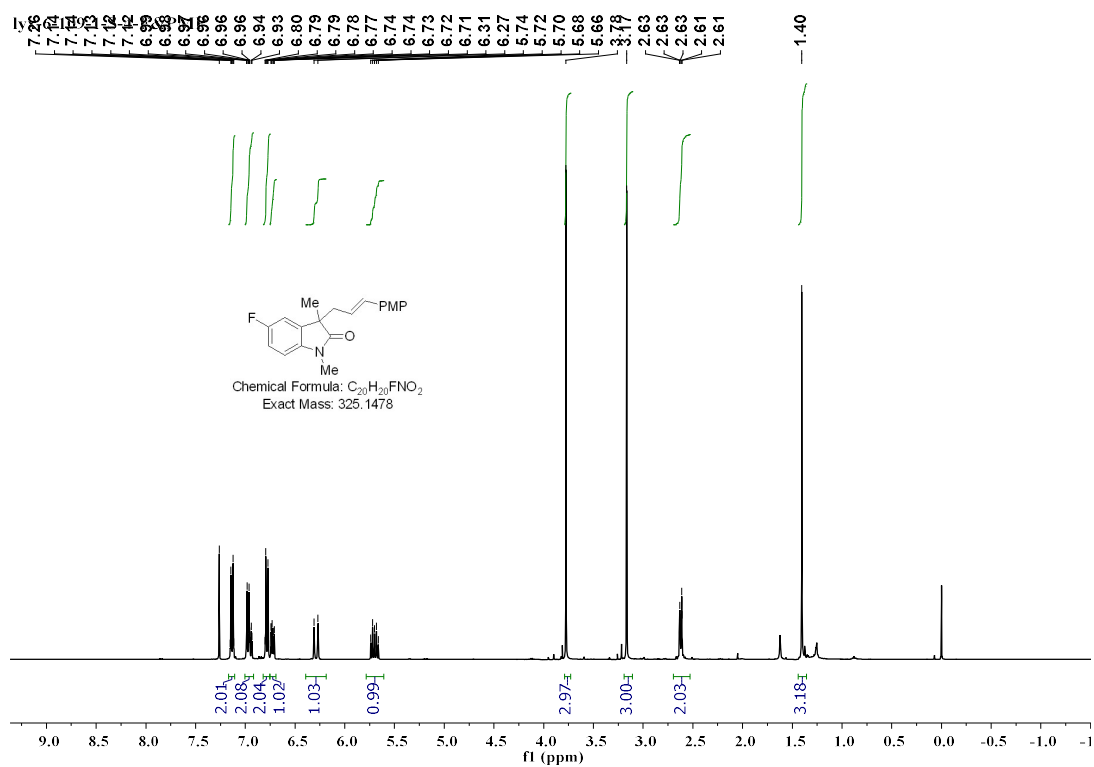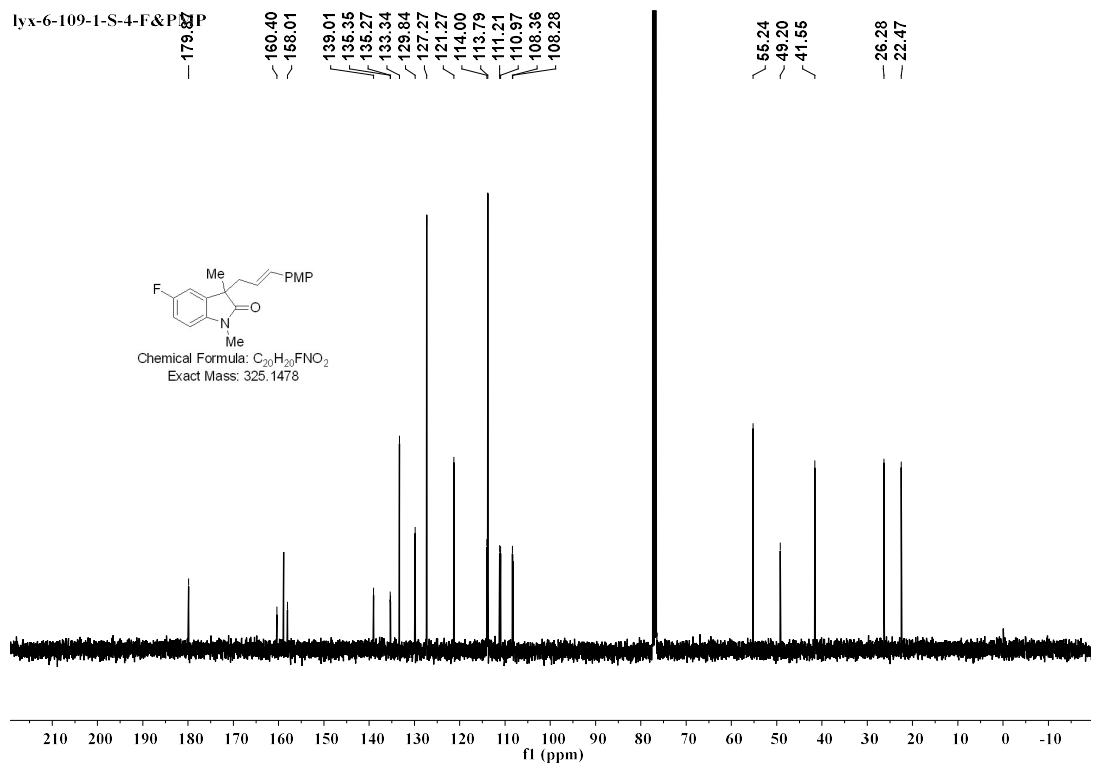

lyx-6-109-1-S-4-F&PMP

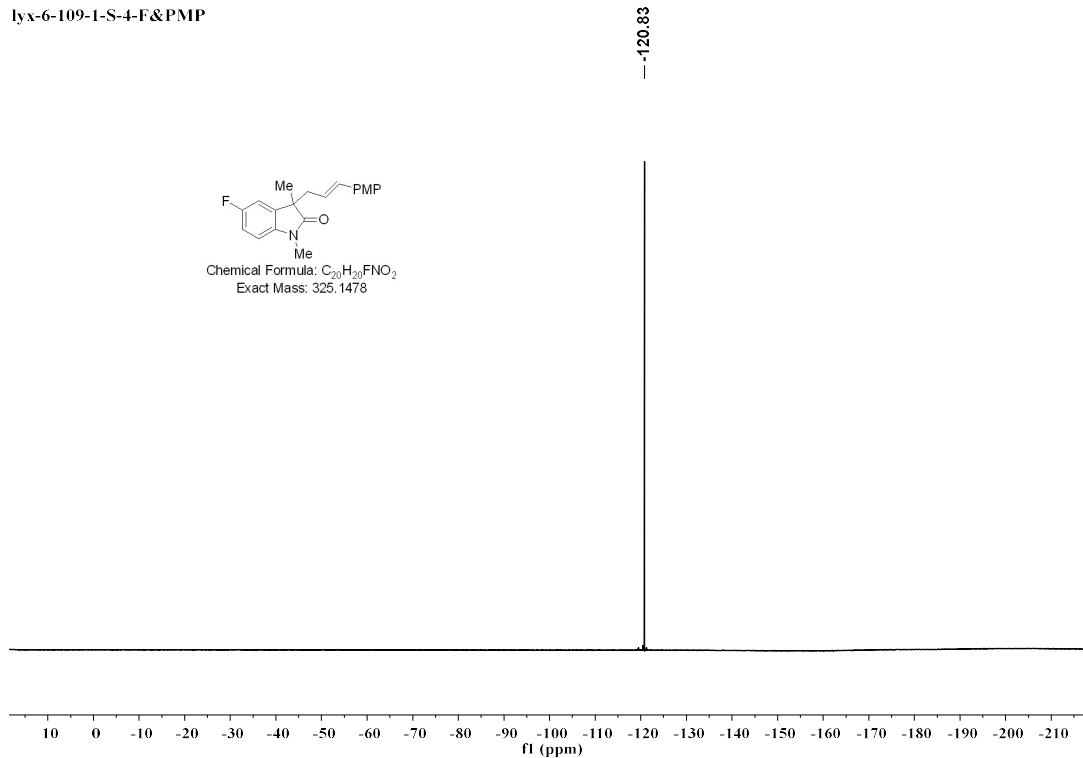

3ea

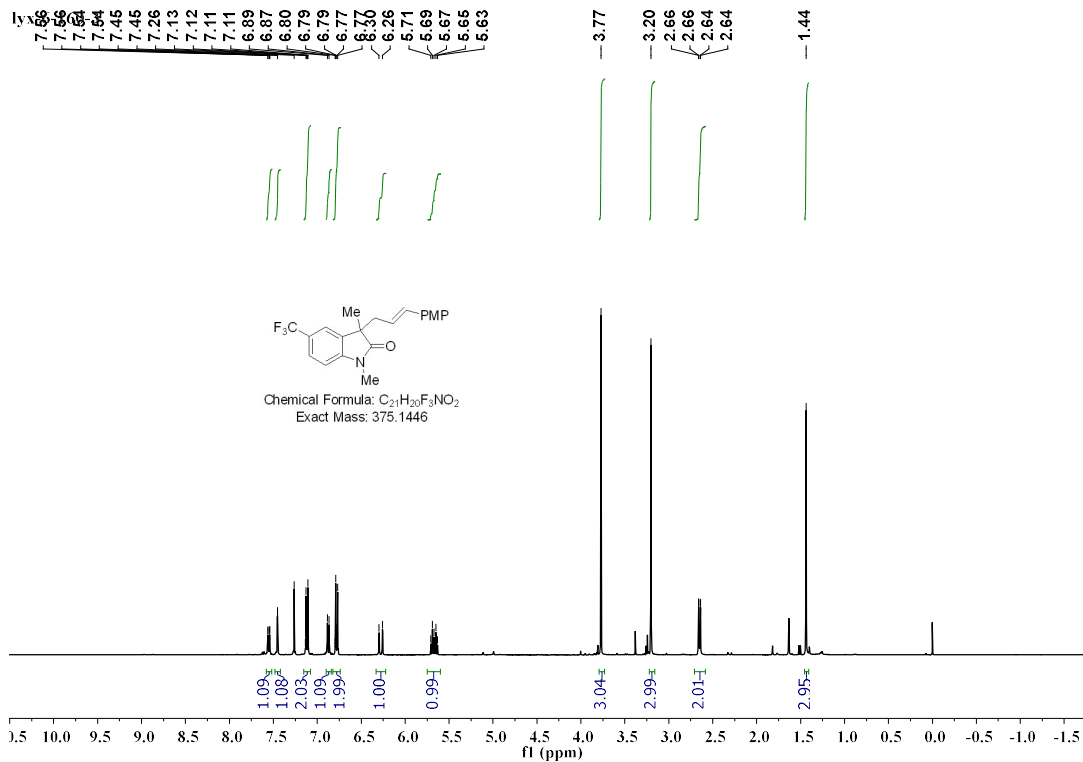

lyx-6-160-3

180.16  
159.03  
146.15  
127.32  
126.42  
125.85  
125.75  
125.71  
125.67  
125.63  
124.75  
124.43  
120.00  
119.96  
119.93  
119.89  
56.27  
48.84  
41.58  
26.38  
22.42

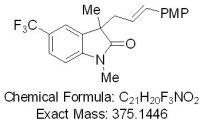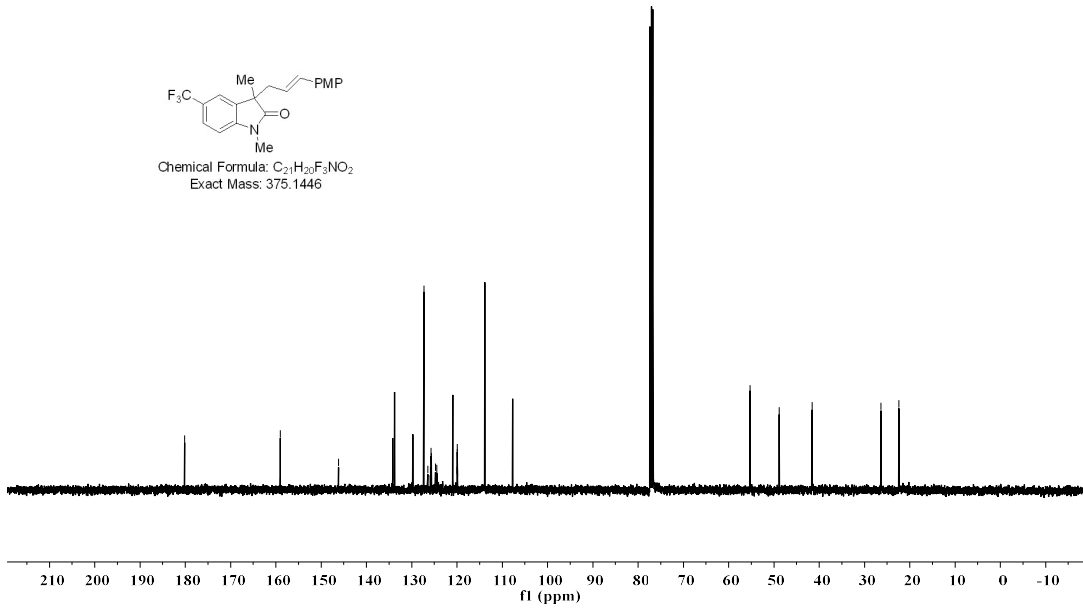

lyx-6-160-3

-61.27

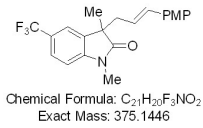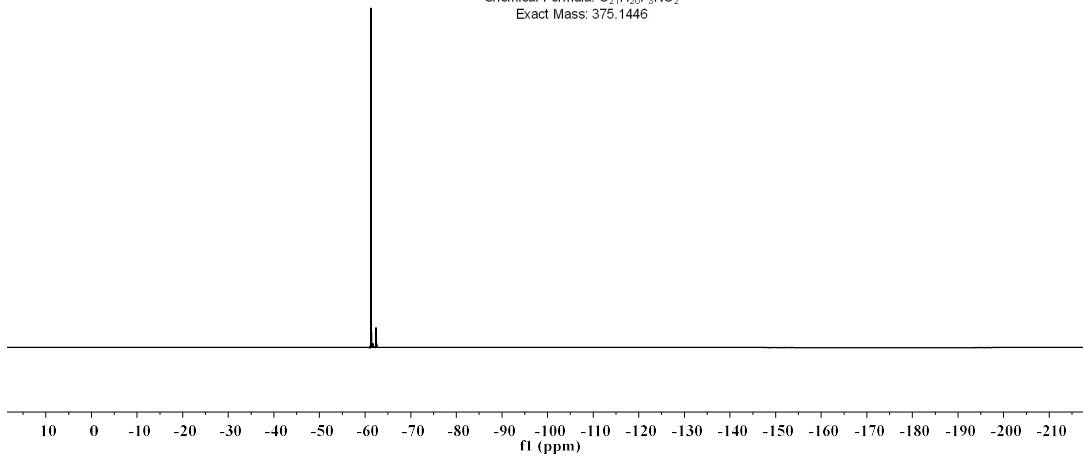

### 3fa

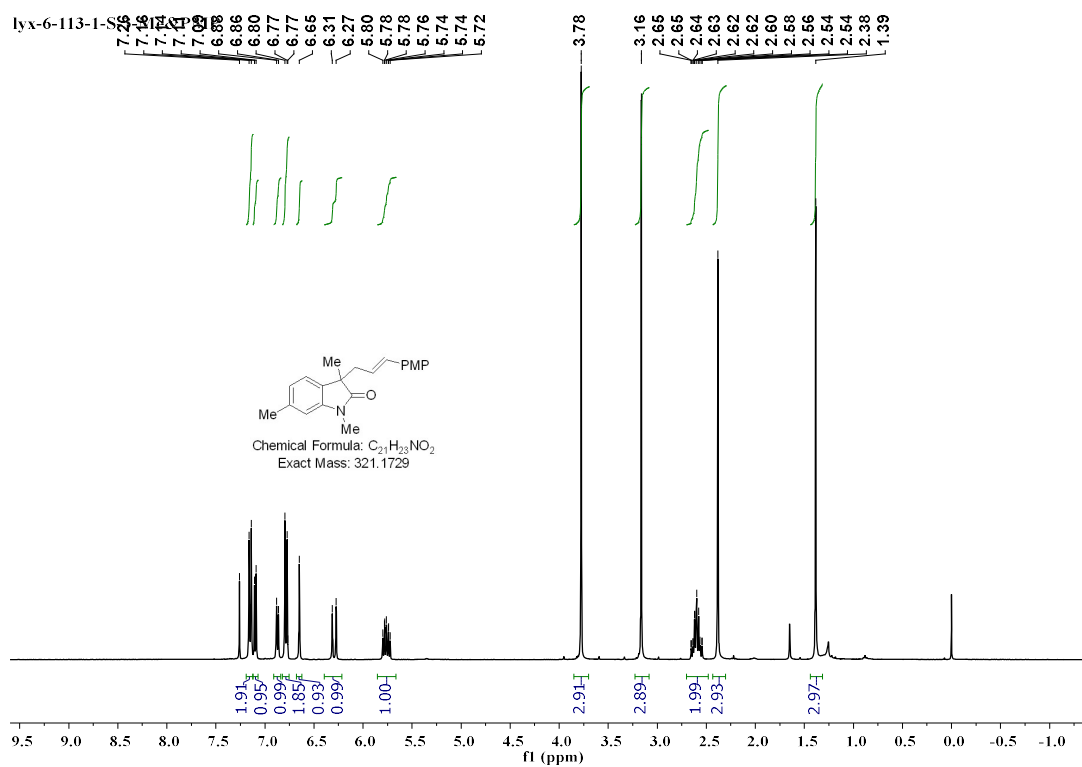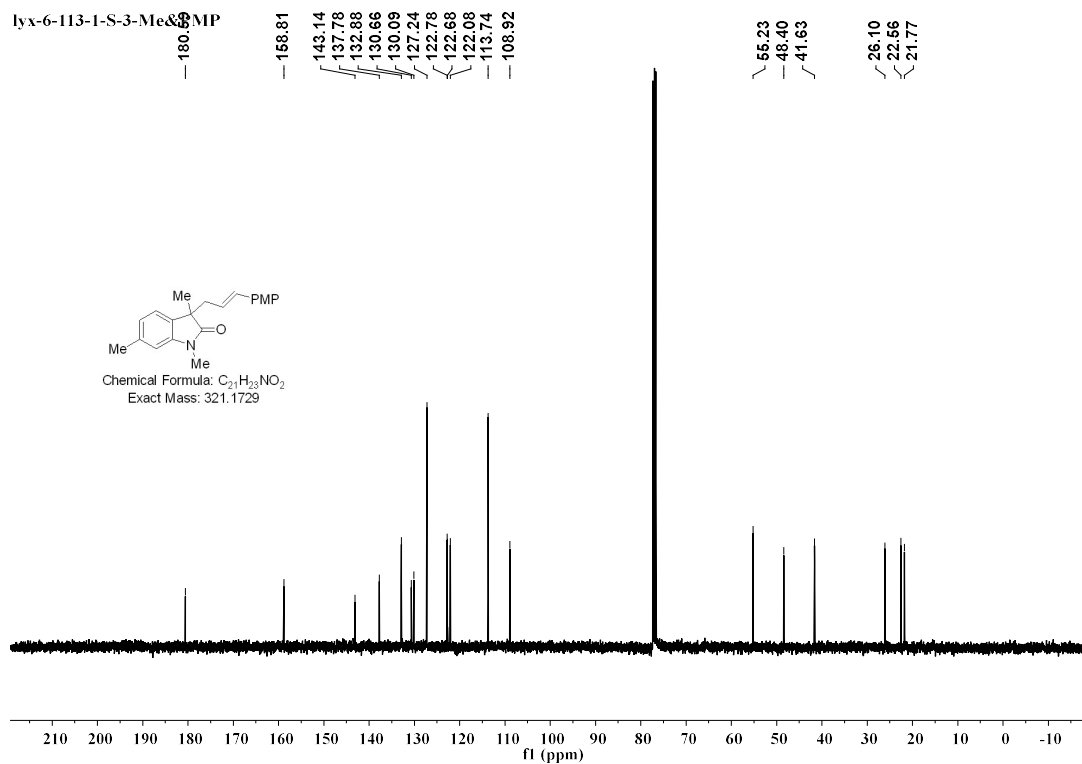



**3ga**

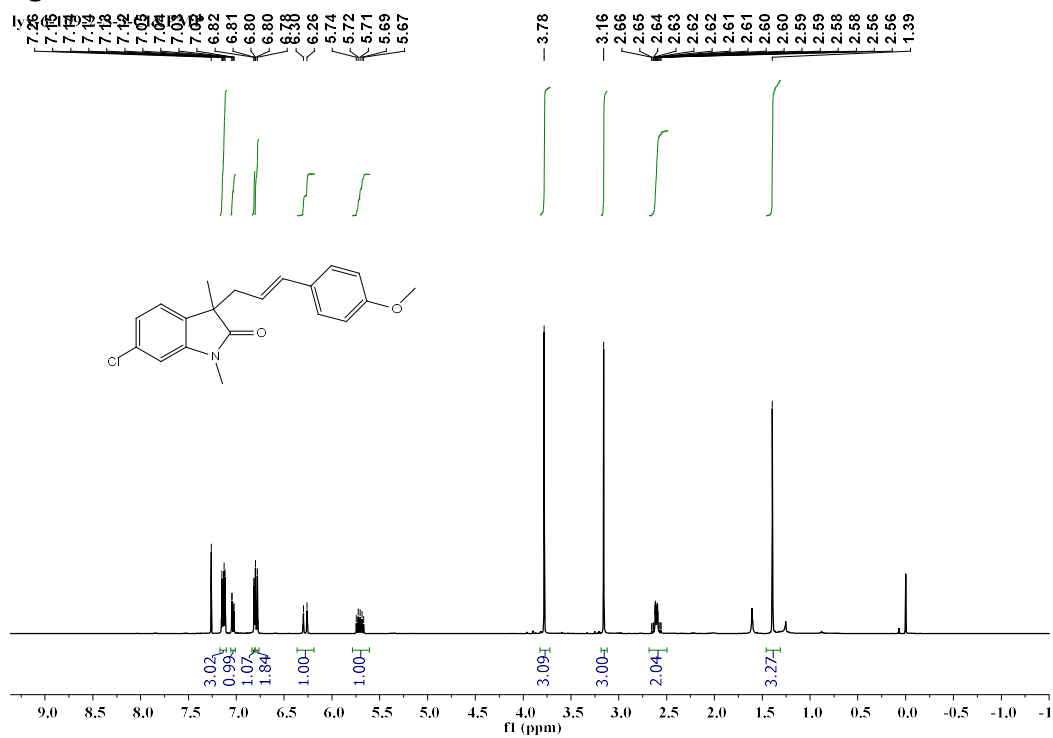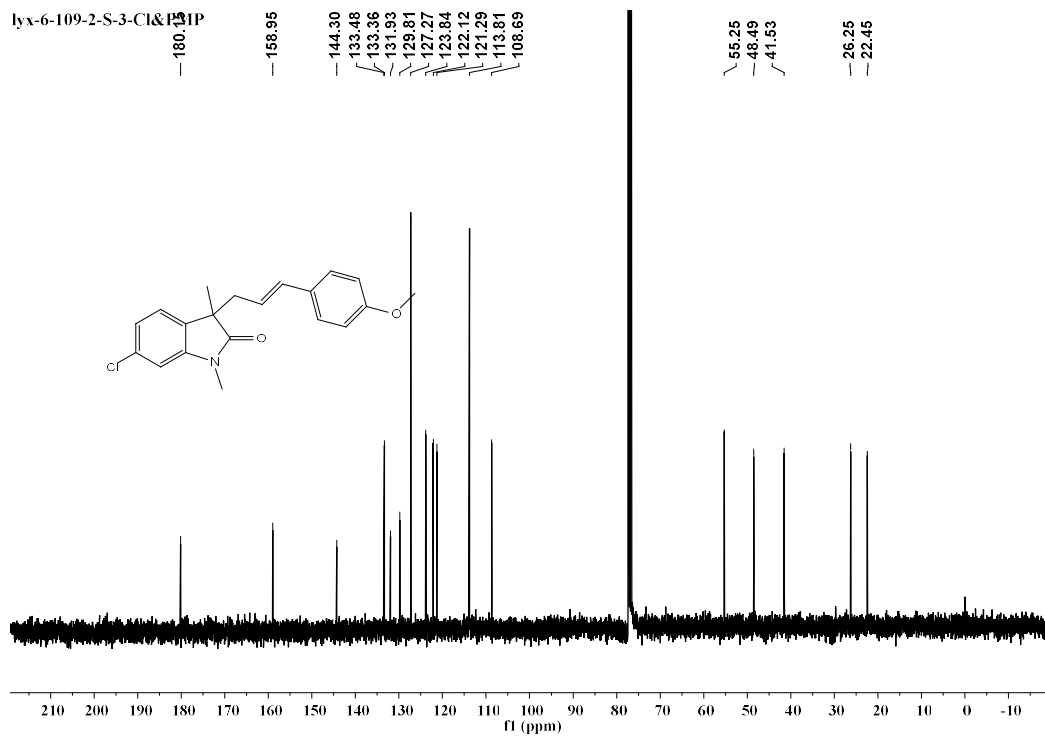

# 3ha

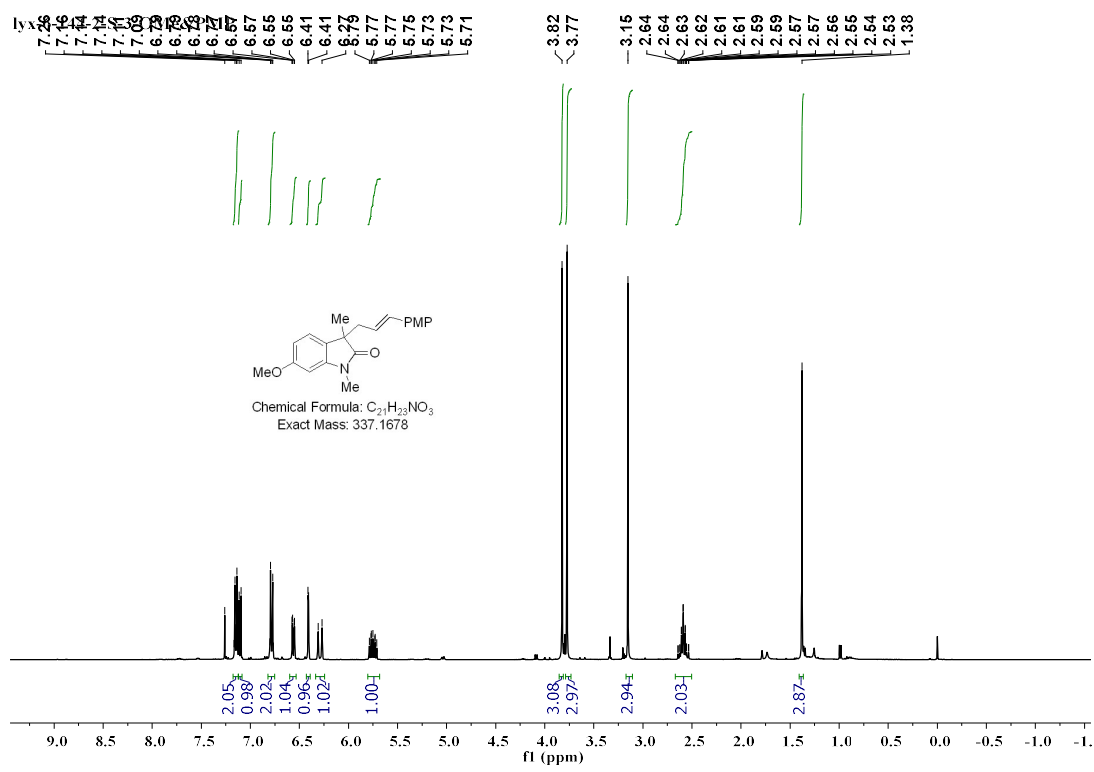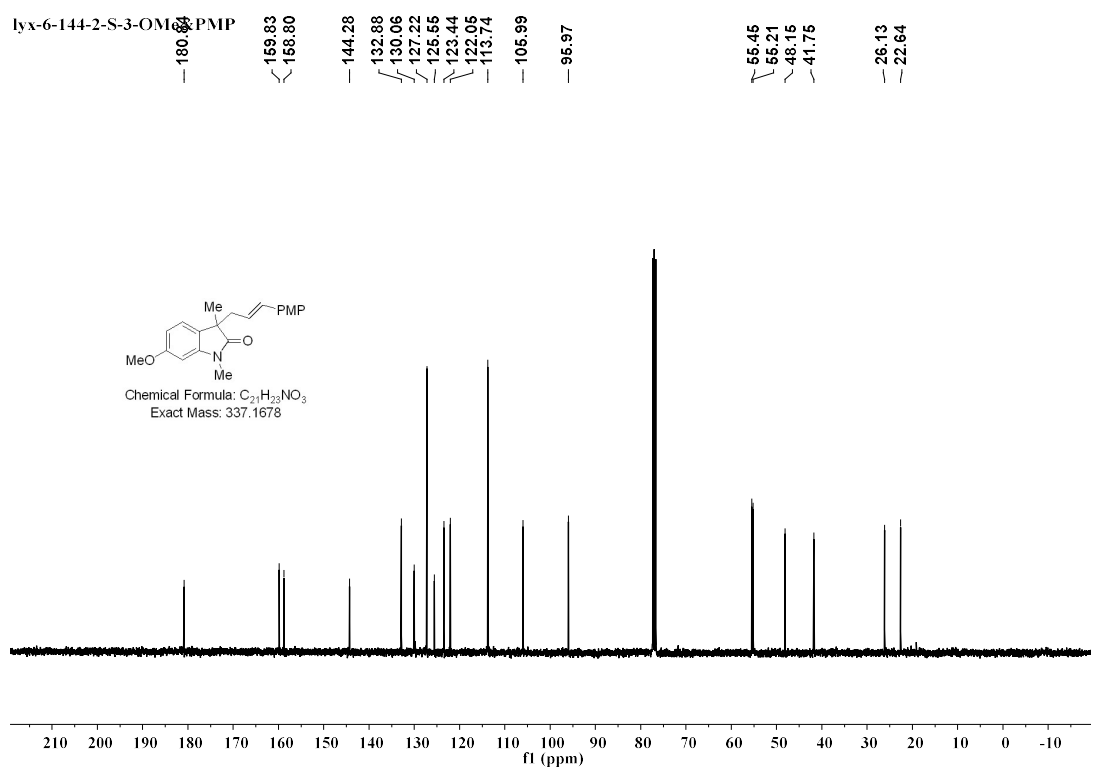

### 3ia

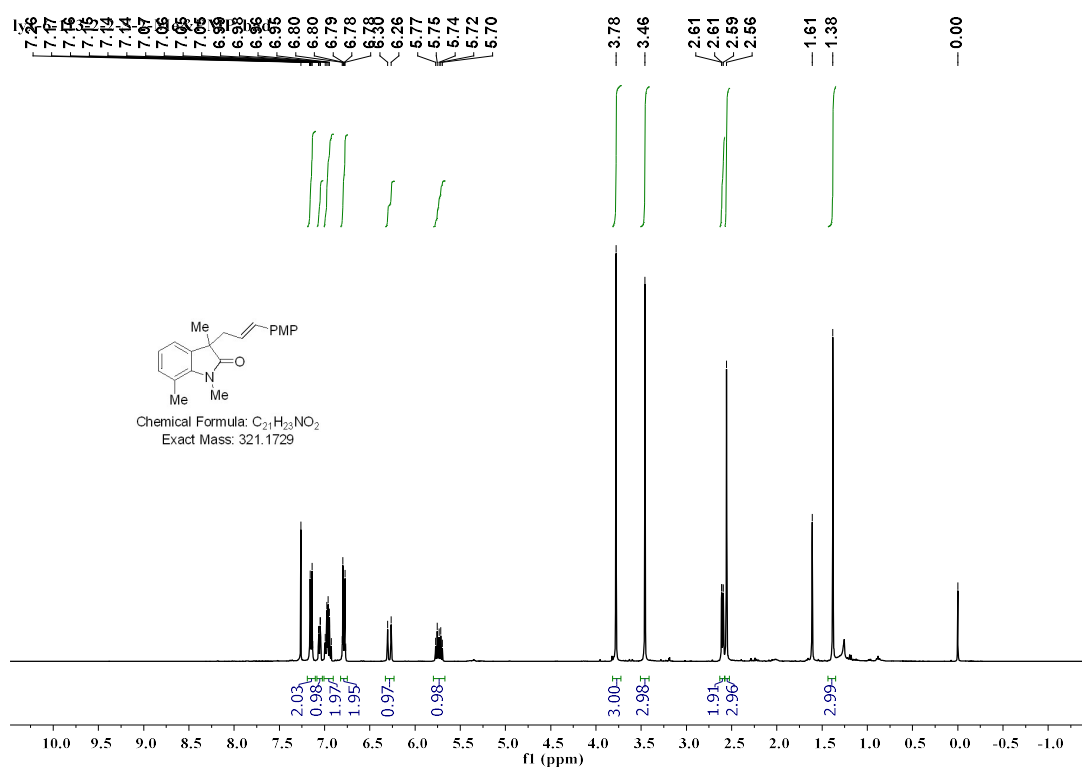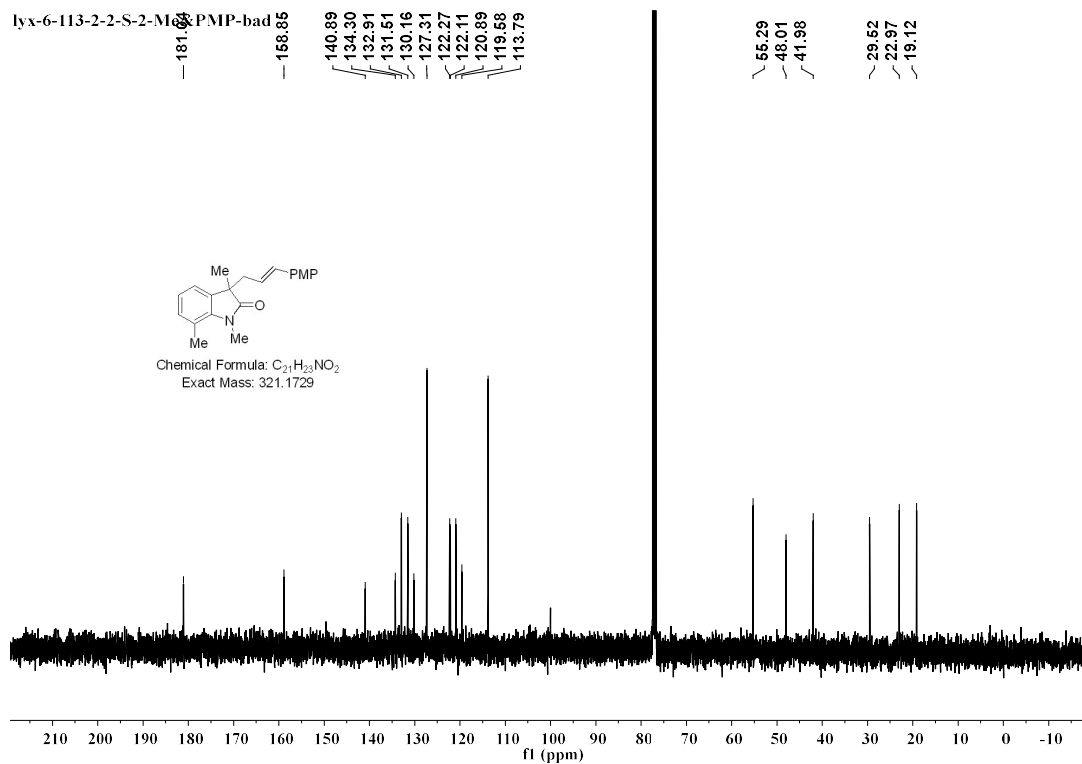

### 3ja

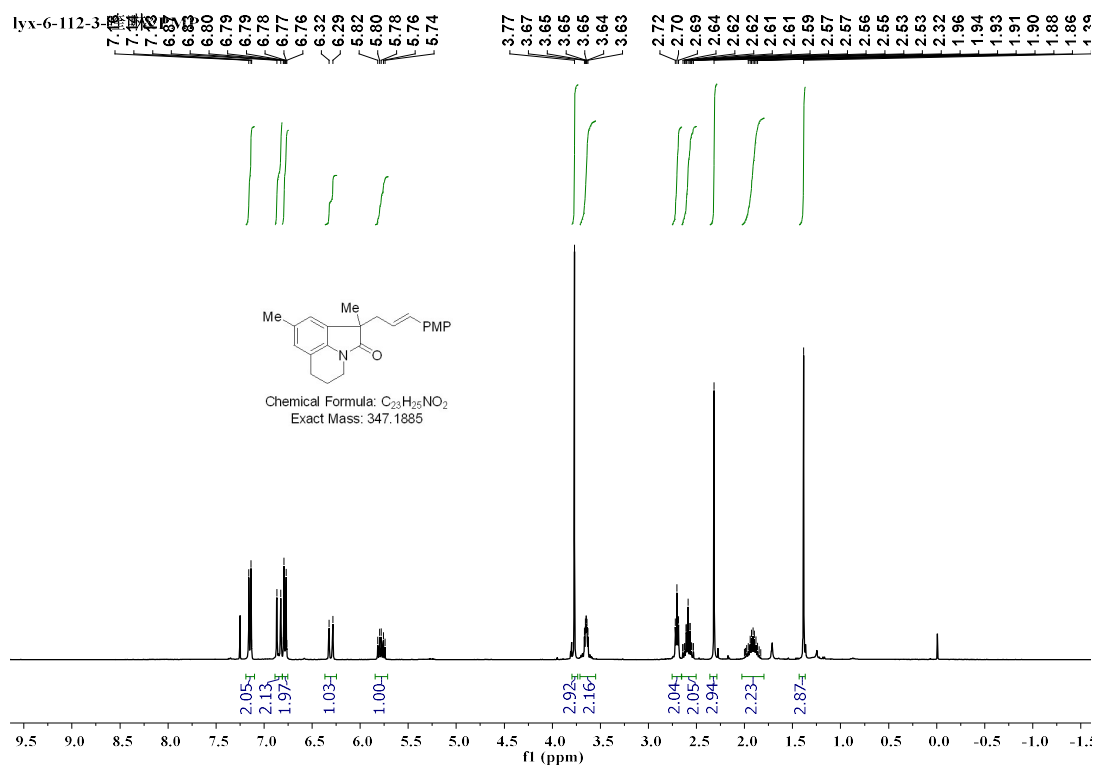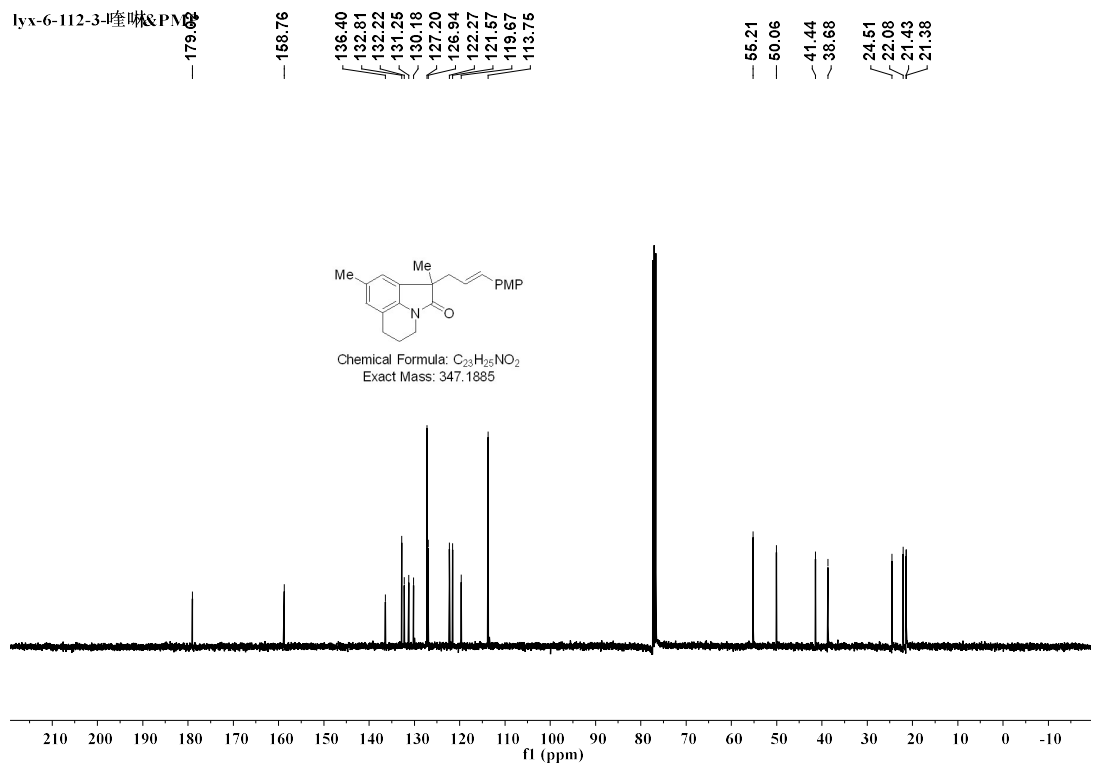

### 3ka

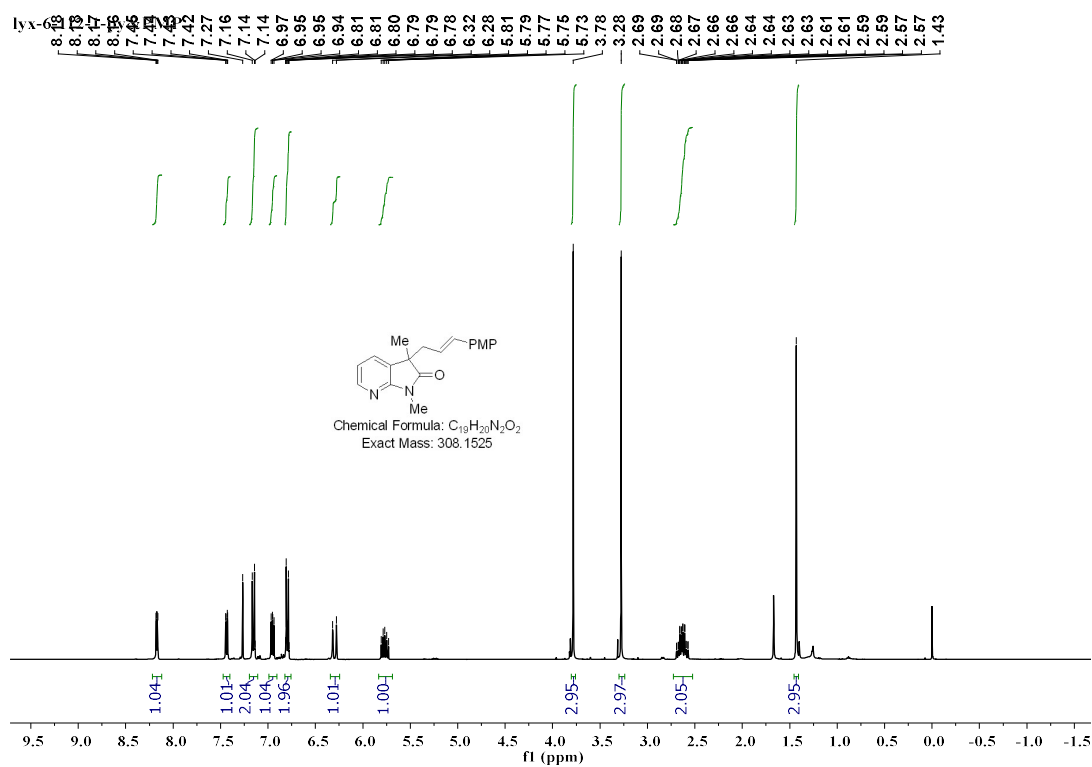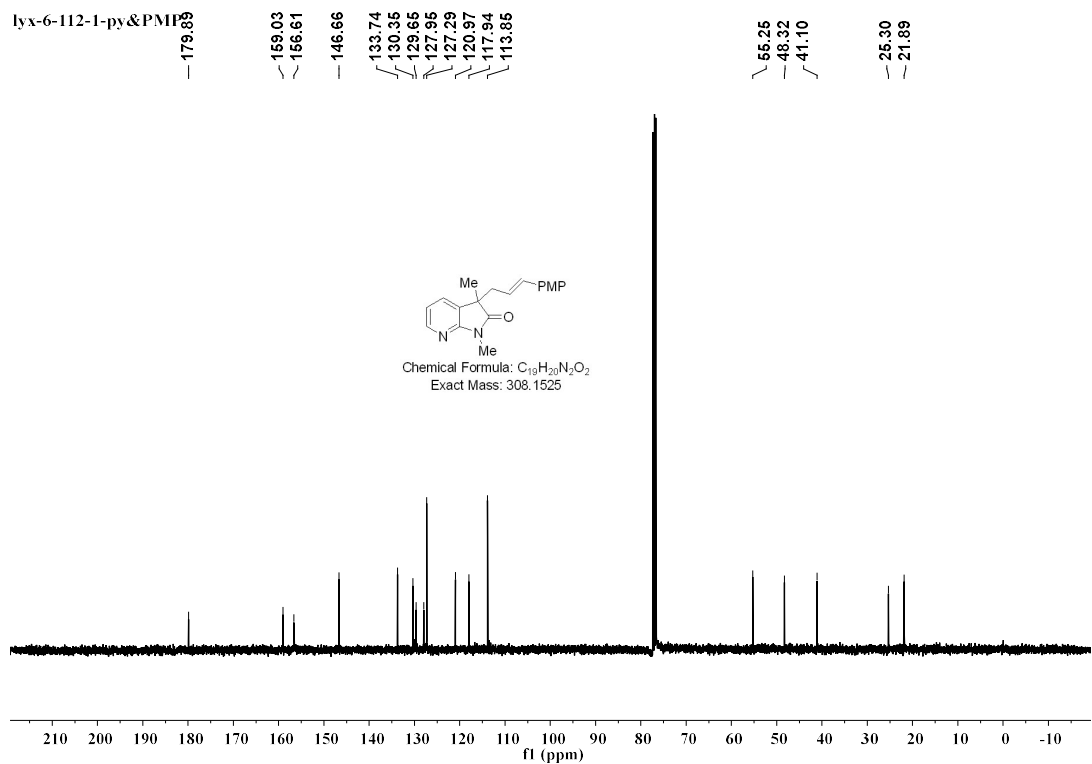

**31a**

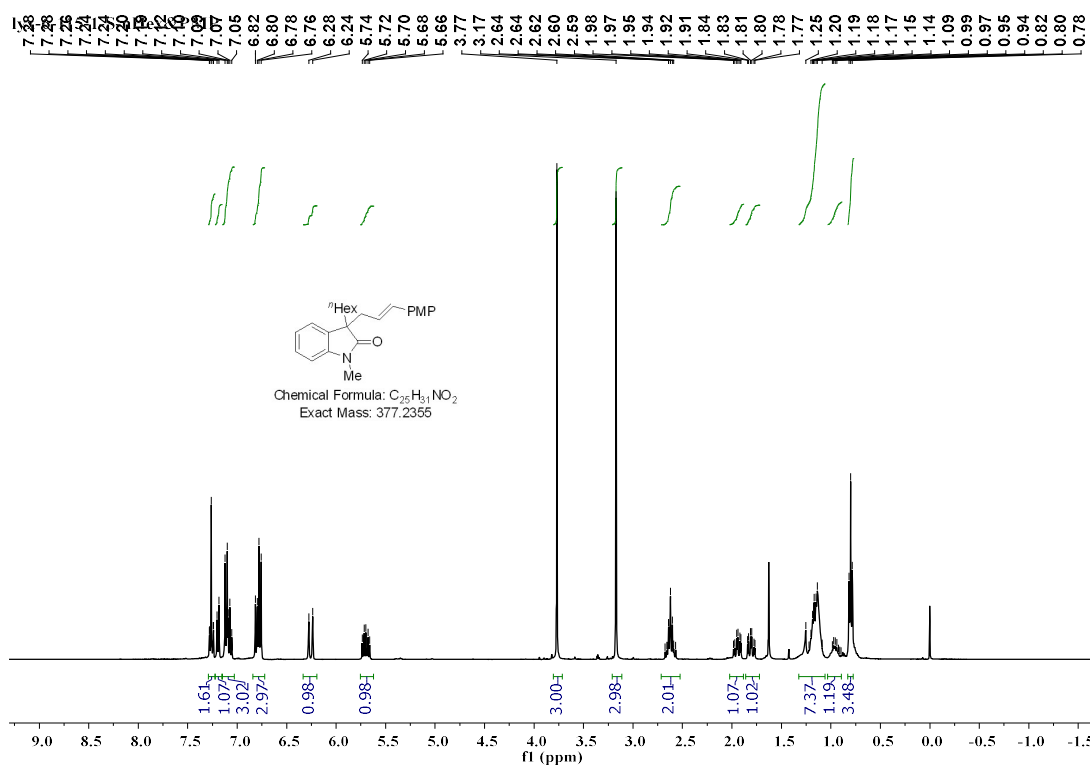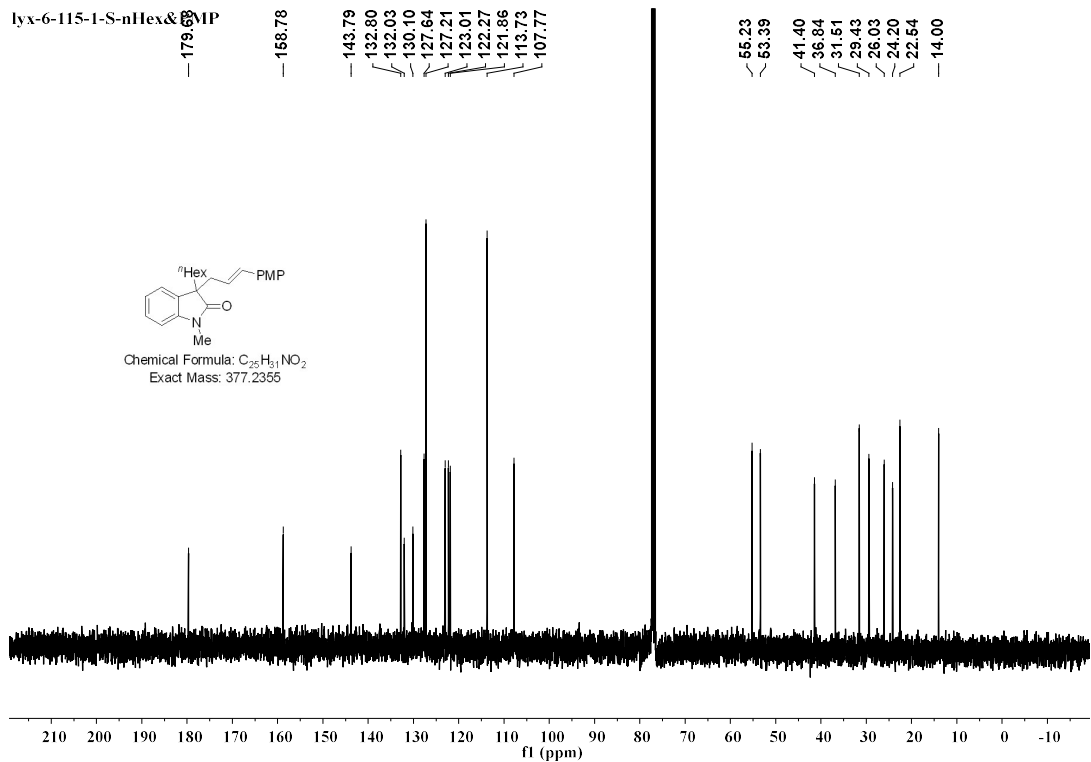

### 3ma

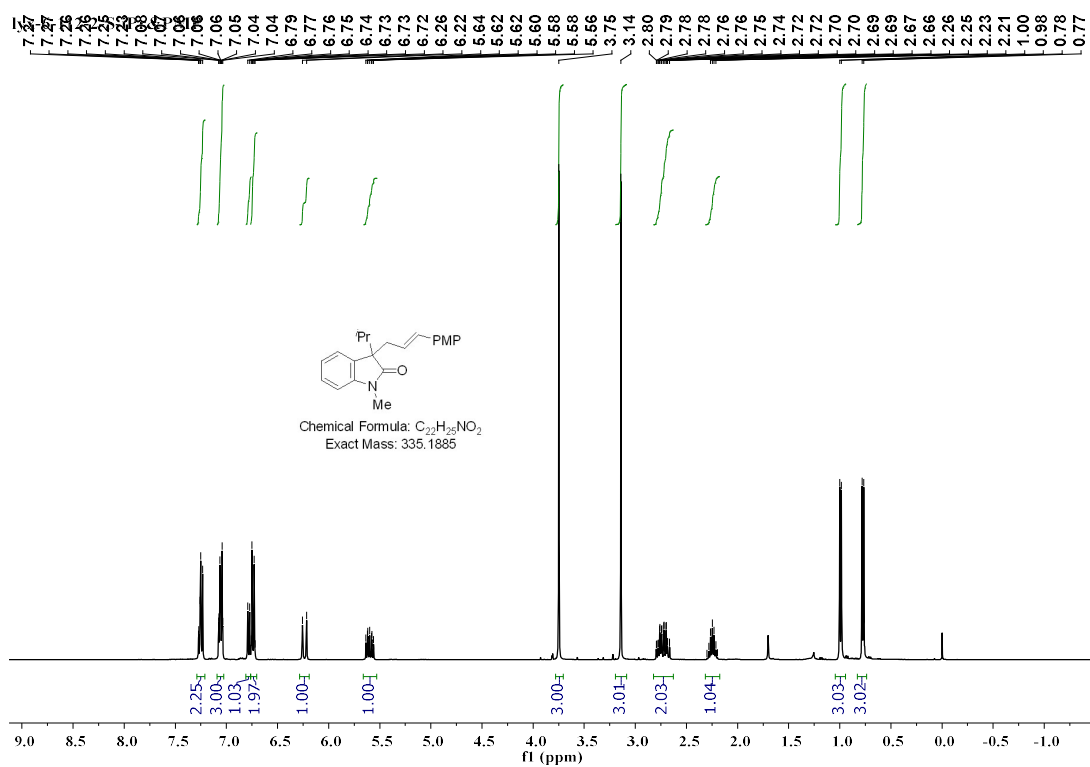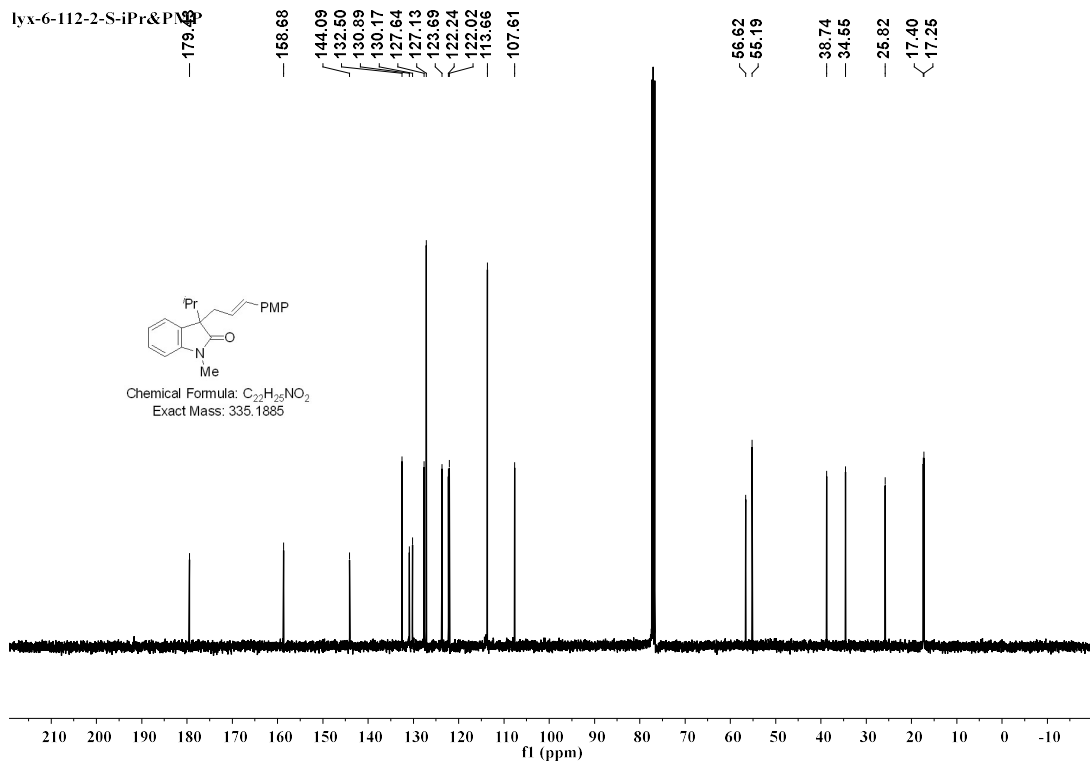

### 3na

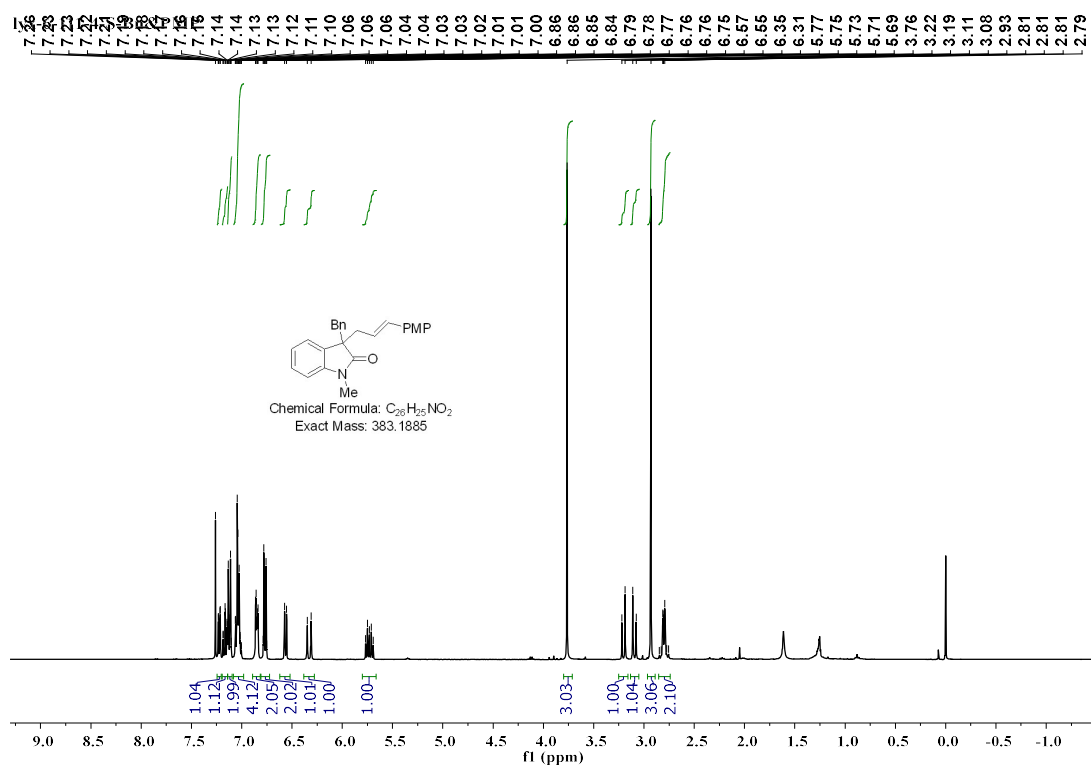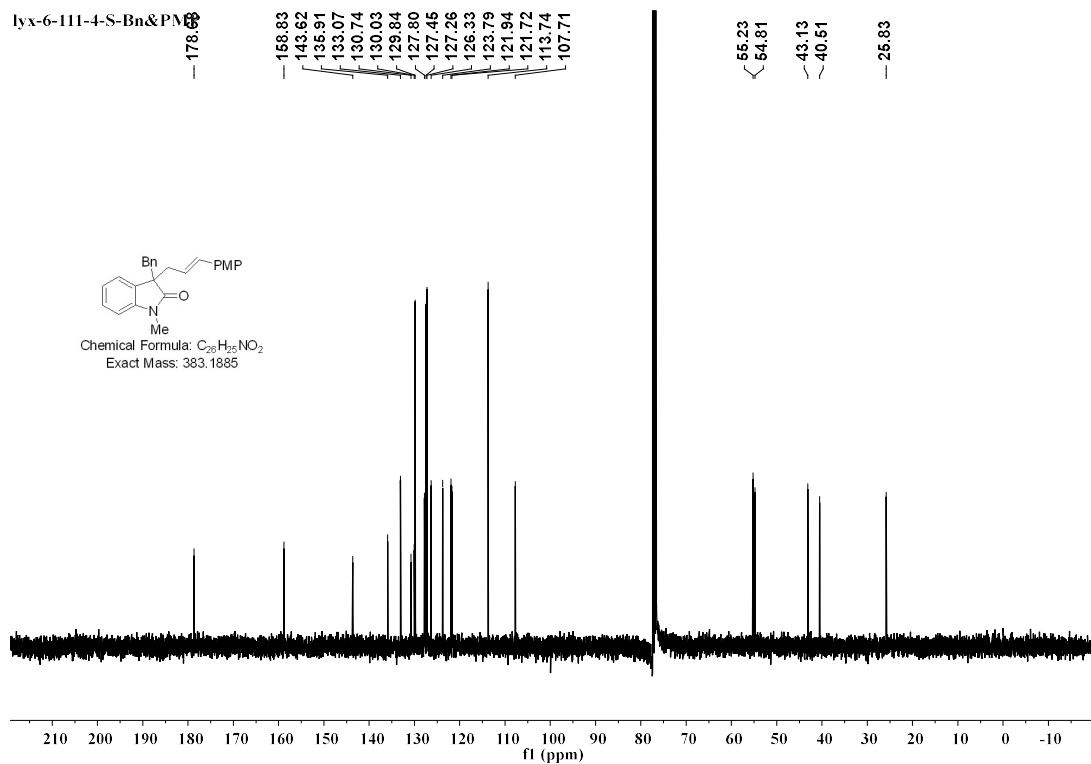



### 30a

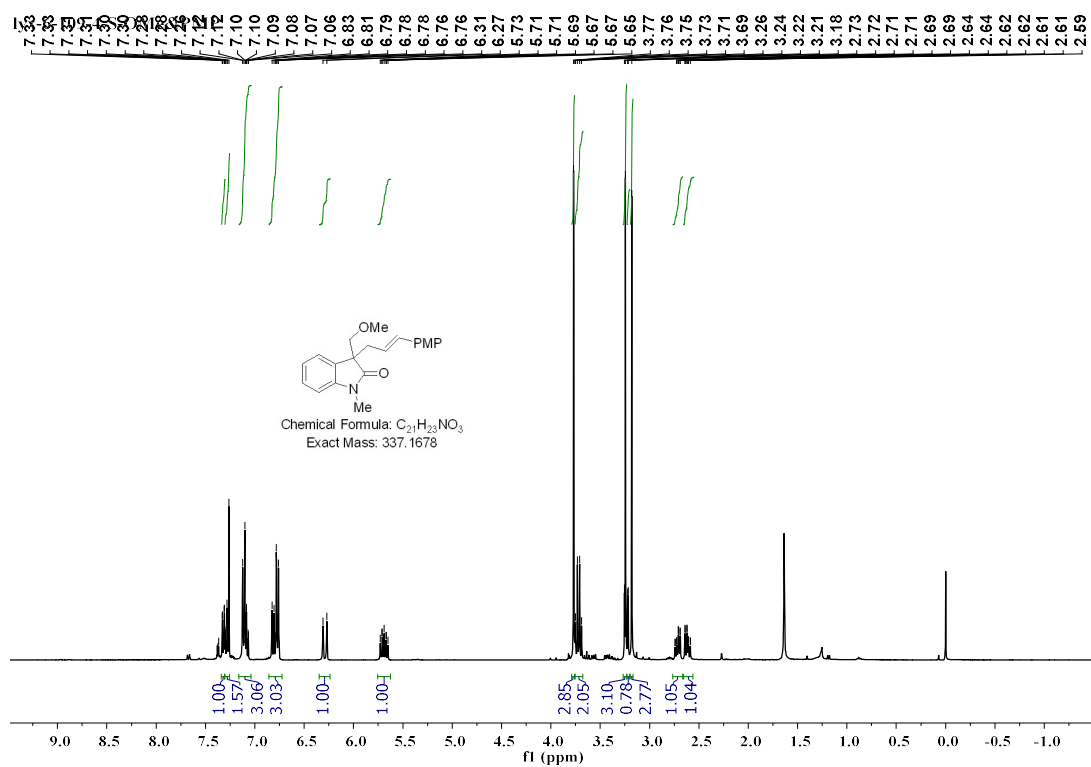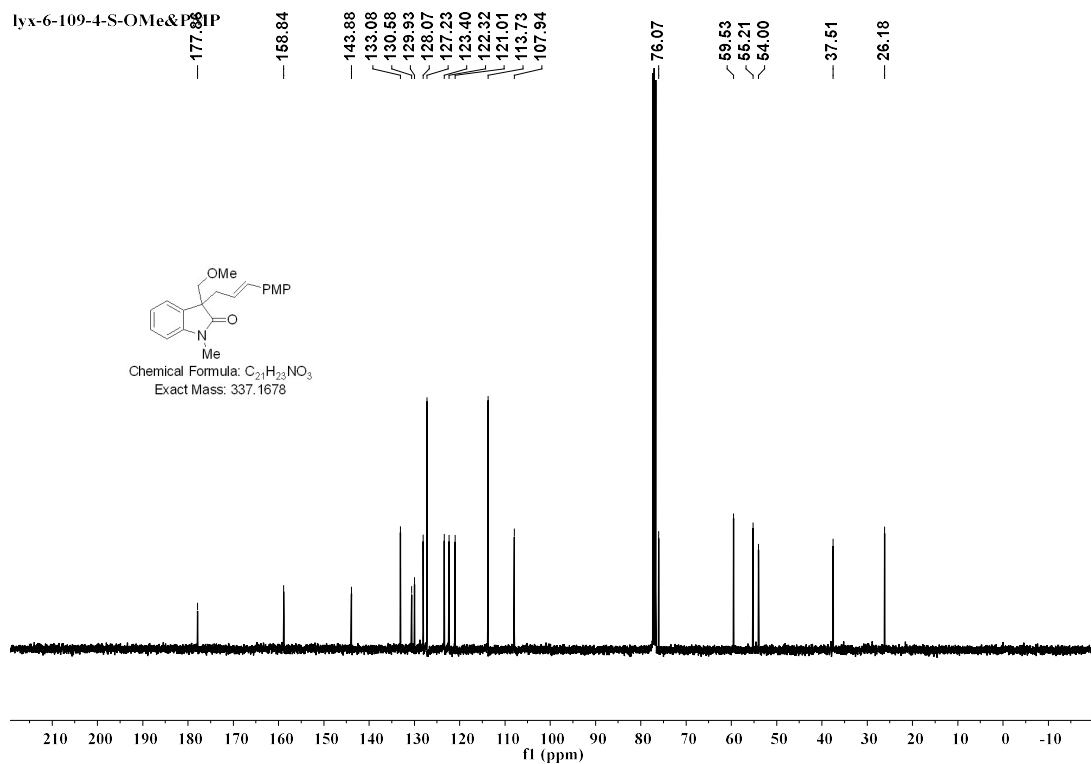

### 3pa

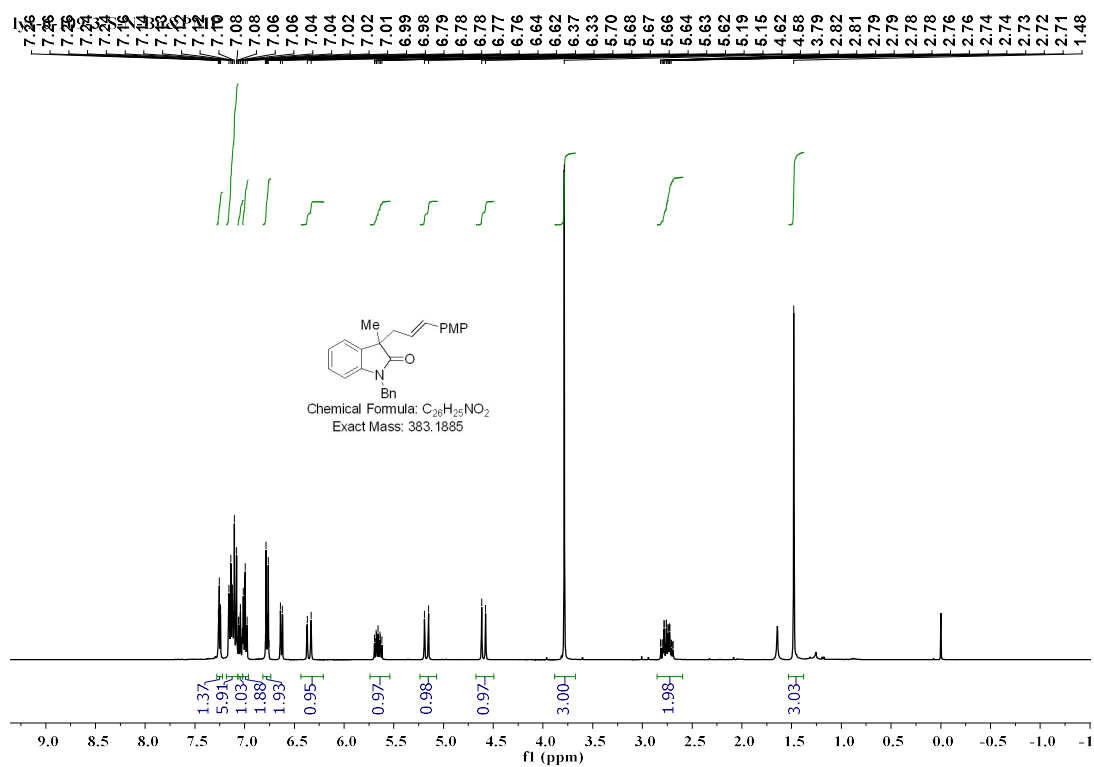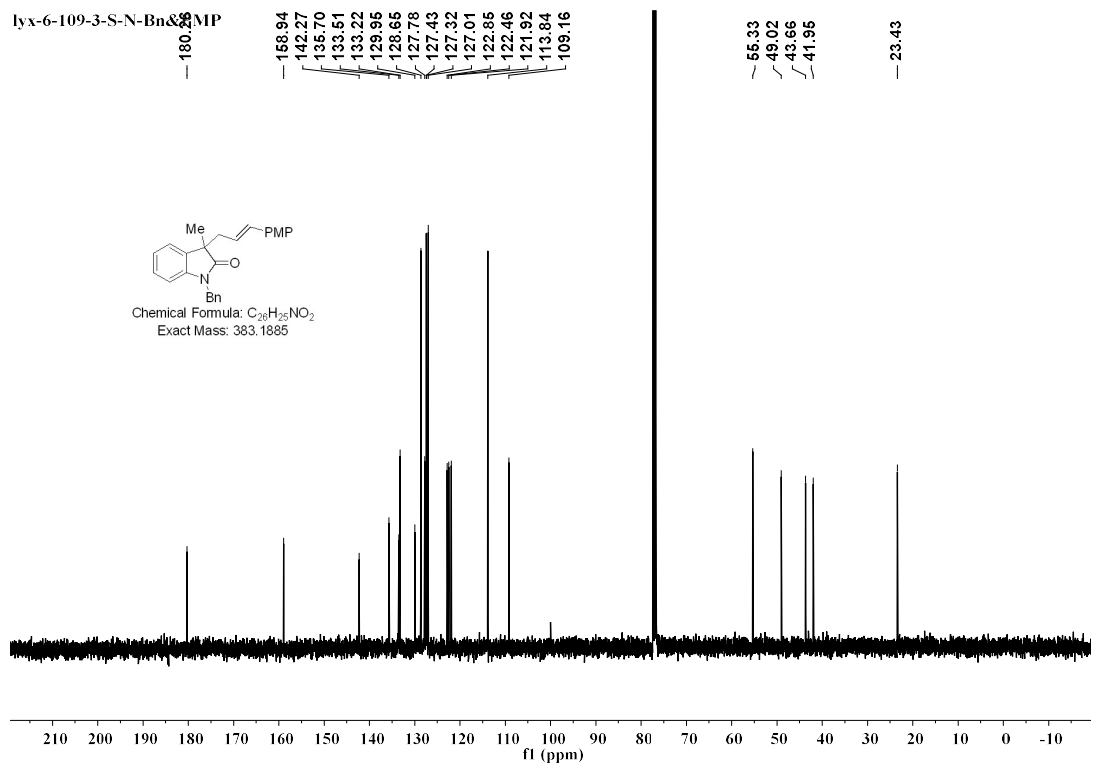

**3ab**

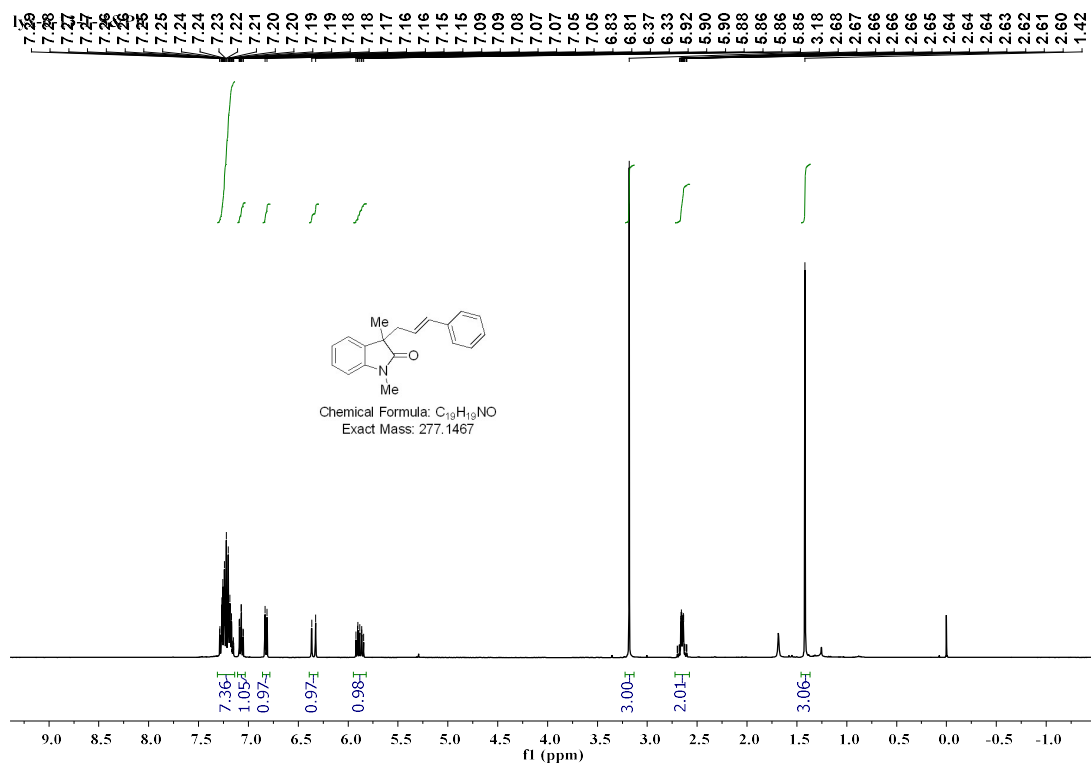

lyx-6-13-1-S&Ph

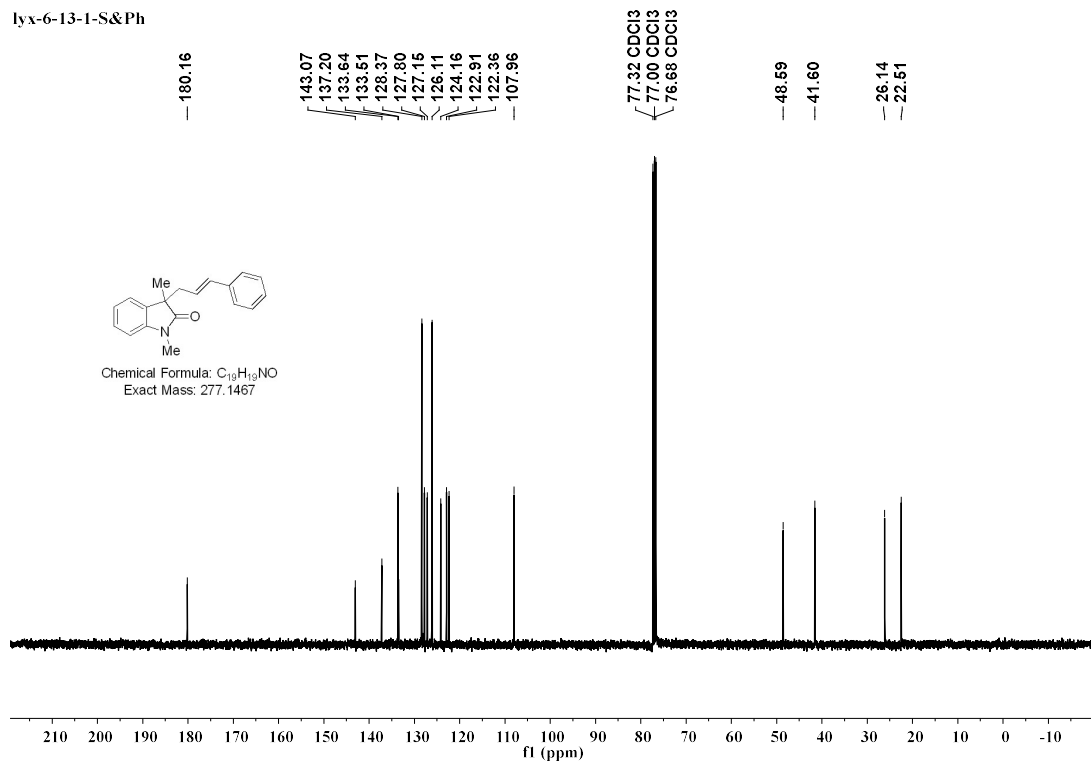

### 3ac

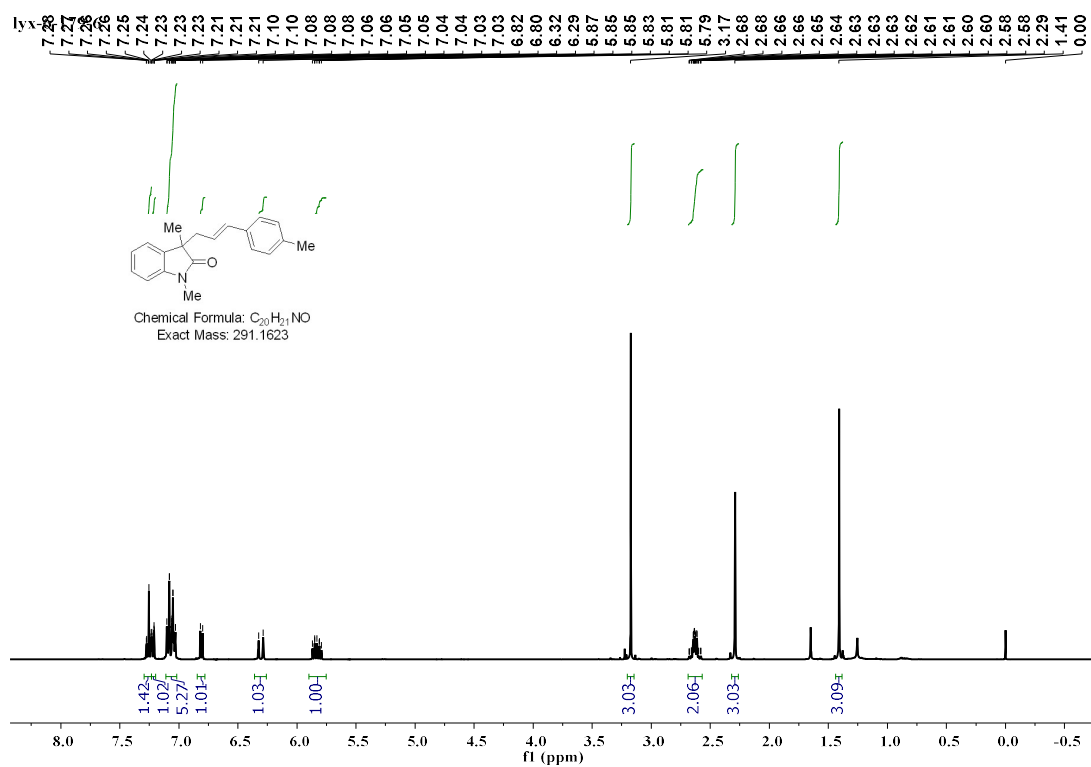

lyx-6-179-6

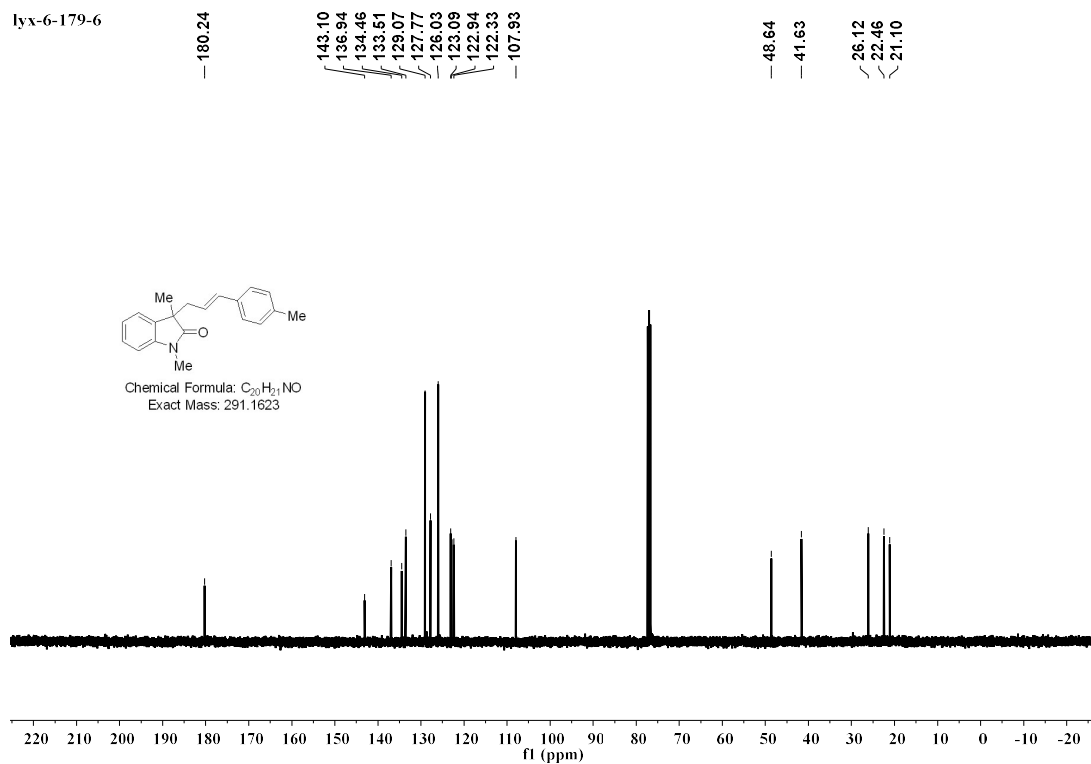

### 3ad

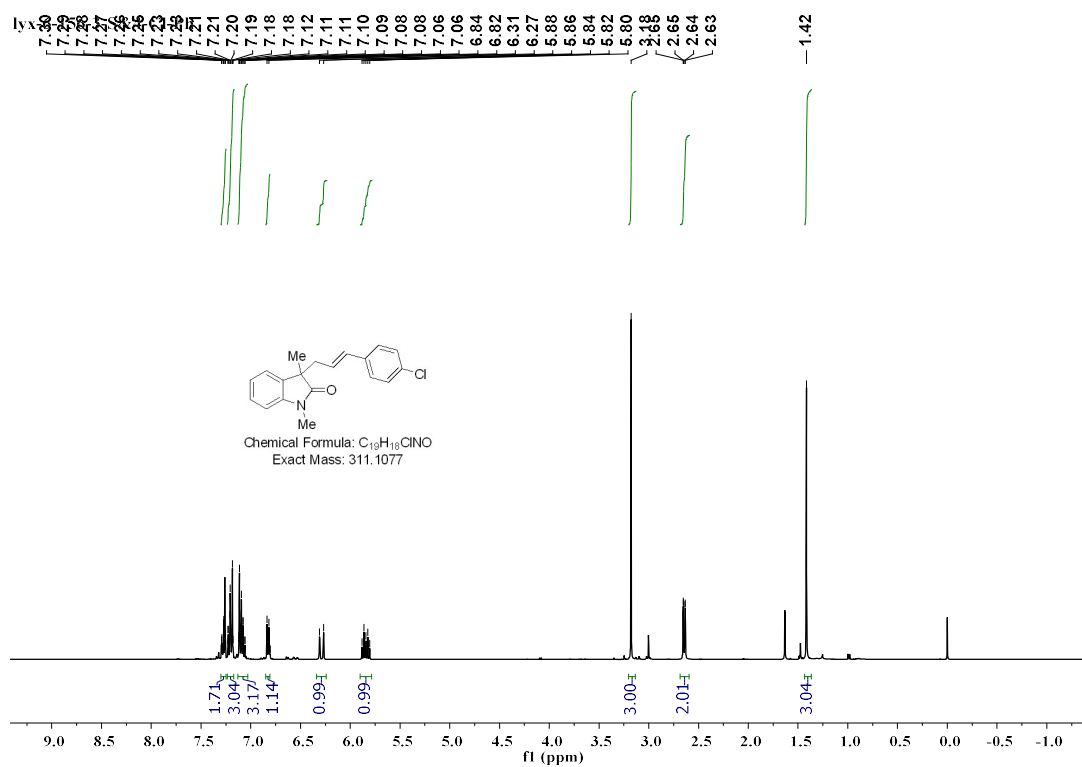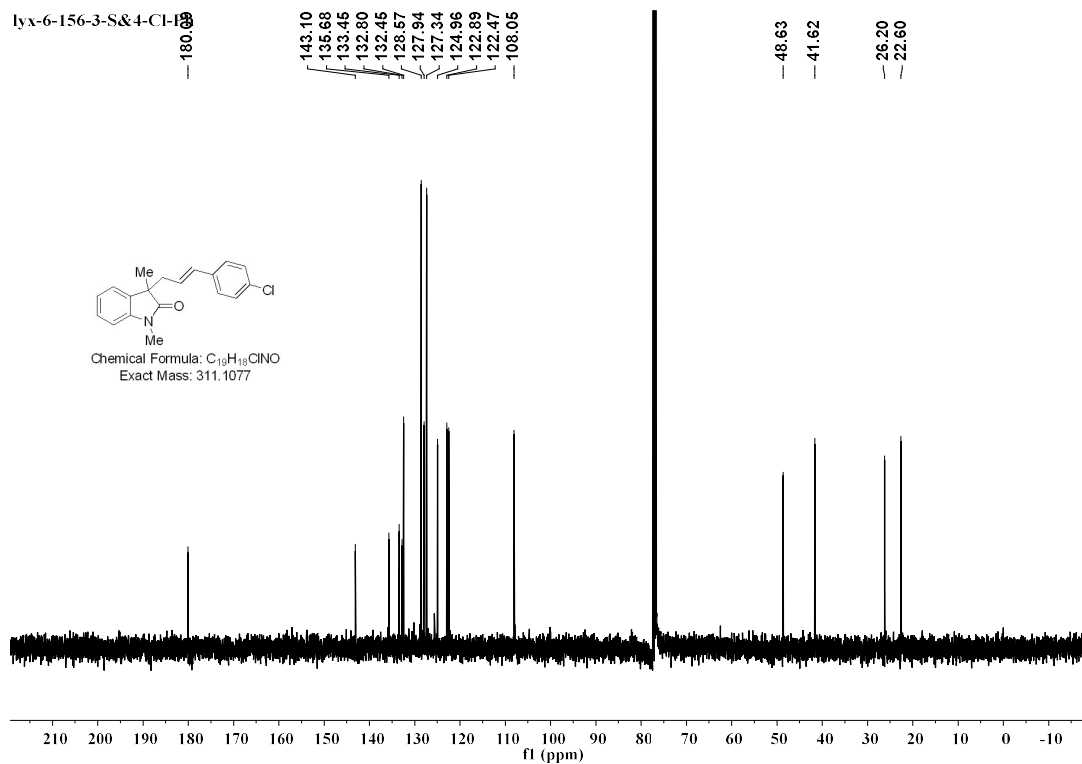

**3ae**

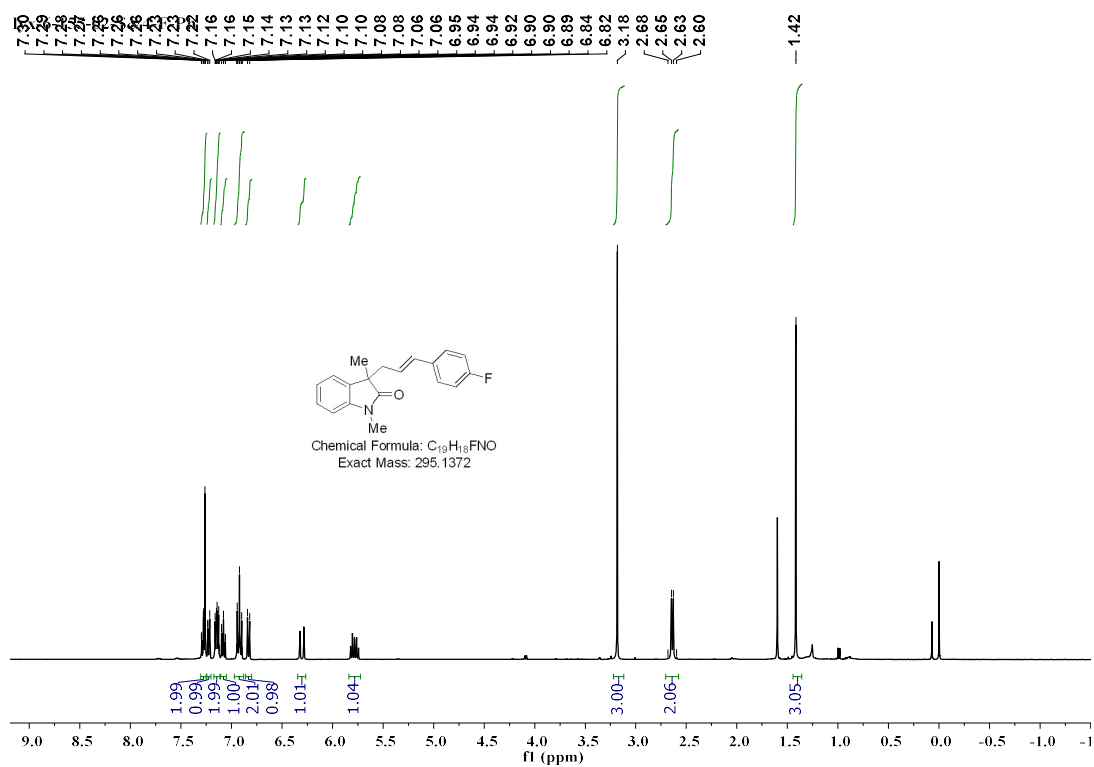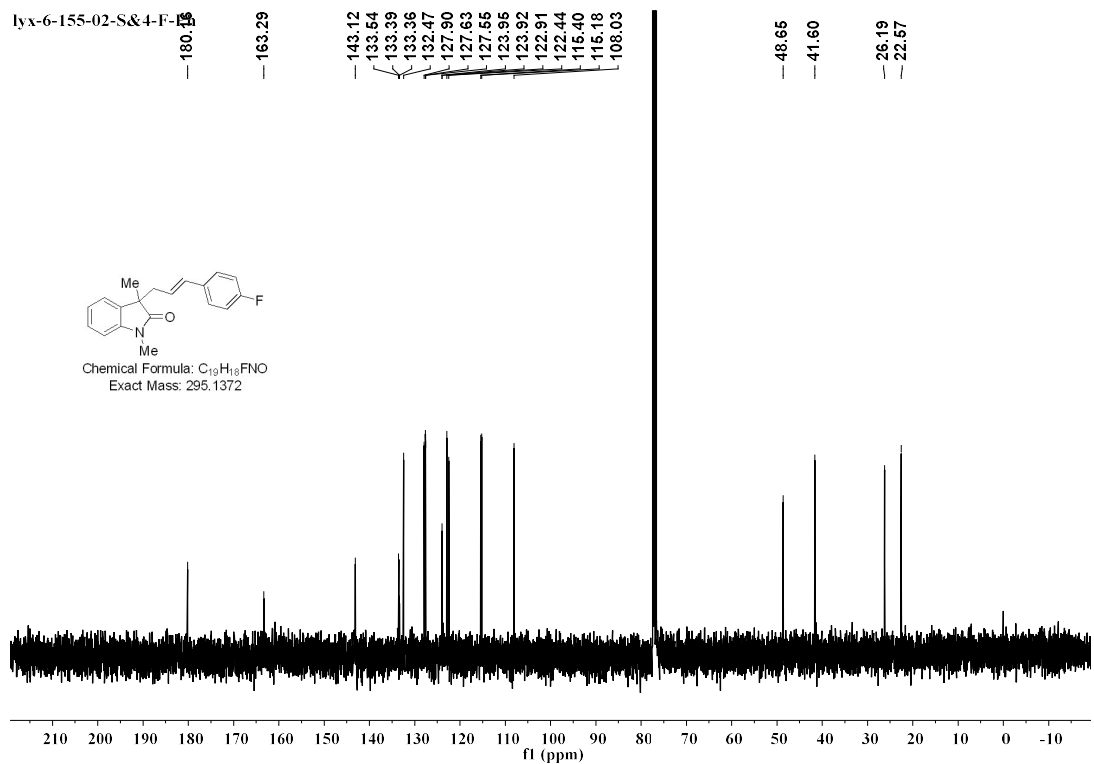

lyx-6-155-02-S&4-F-Ph

-115.06

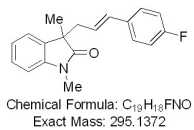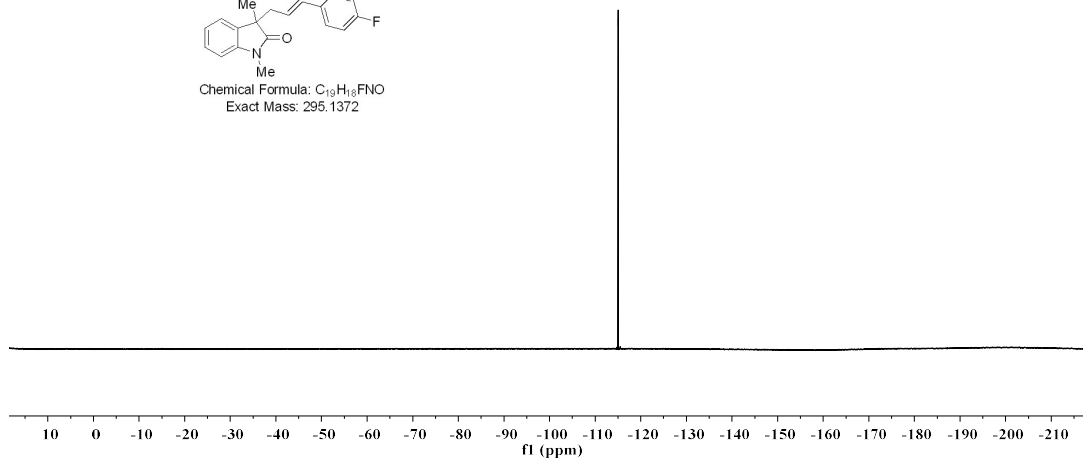

3af

lyx-6  
7.49  
7.47  
7.30  
7.30  
7.28  
7.27  
7.26  
7.25  
7.23  
7.23  
7.22  
7.22  
7.10  
7.10  
7.08  
7.08  
7.07  
7.06  
6.84  
6.82  
6.38  
6.35  
6.00  
5.98  
5.96  
5.94  
5.92  
5.90  
3.18  
2.69  
2.69  
2.69  
2.67  
1.43  
0.00

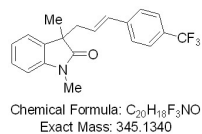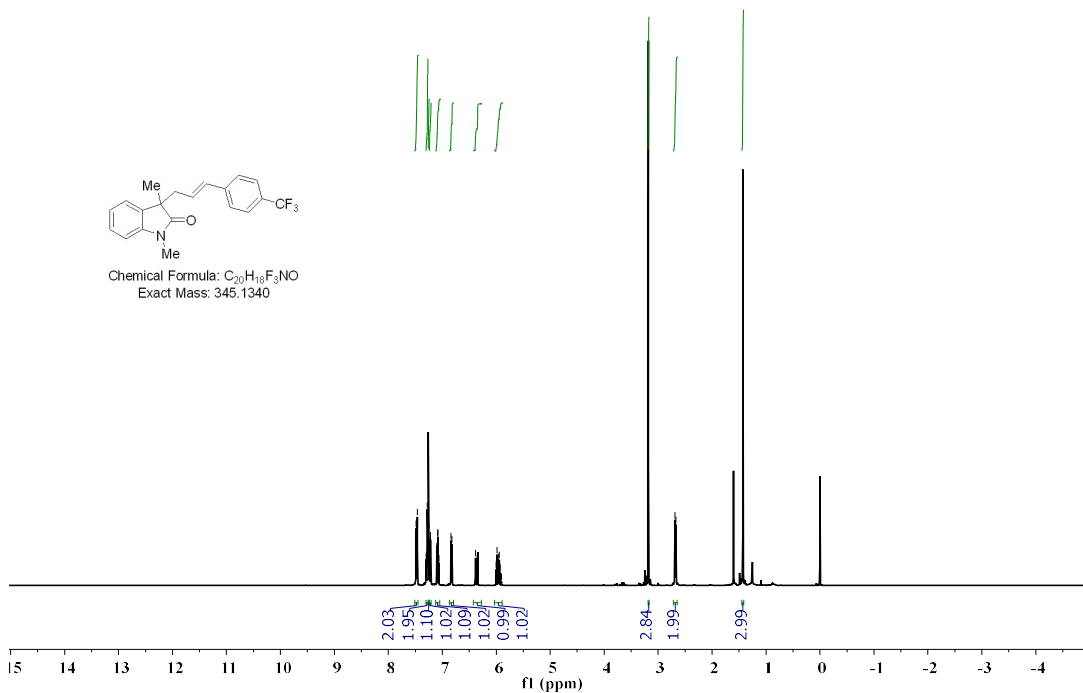

lyx-6-179-5

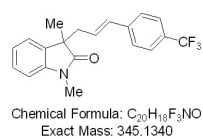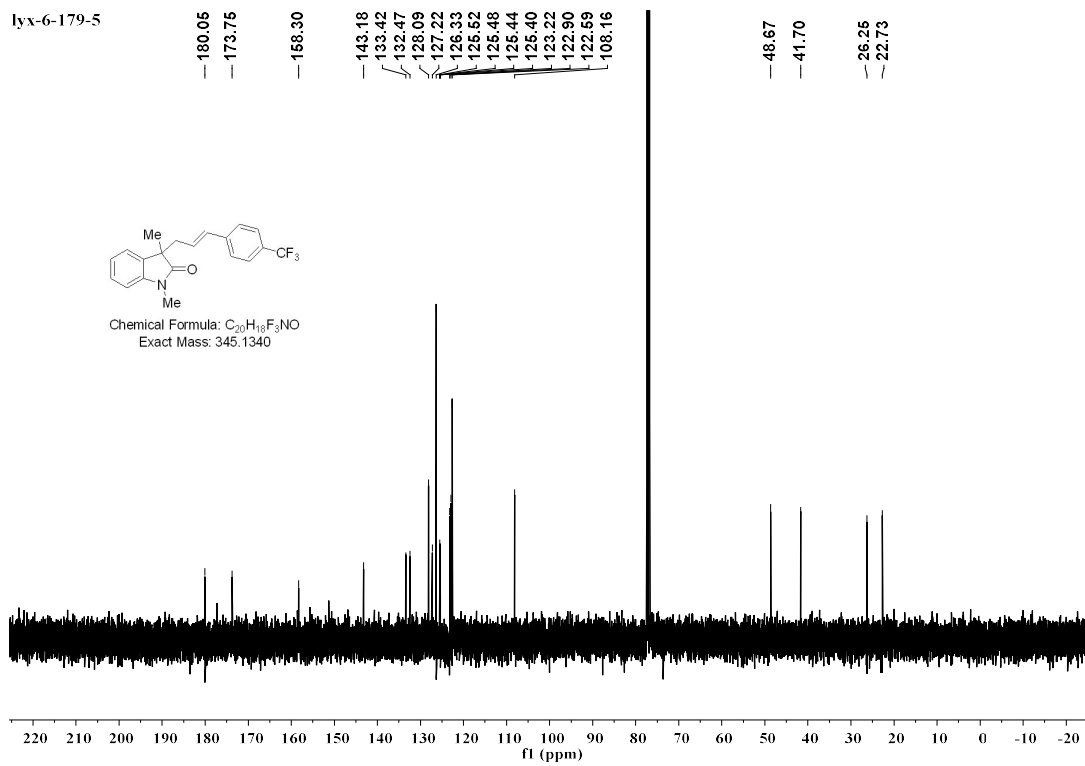

lyx-6-179-5

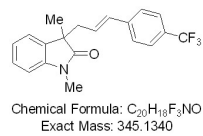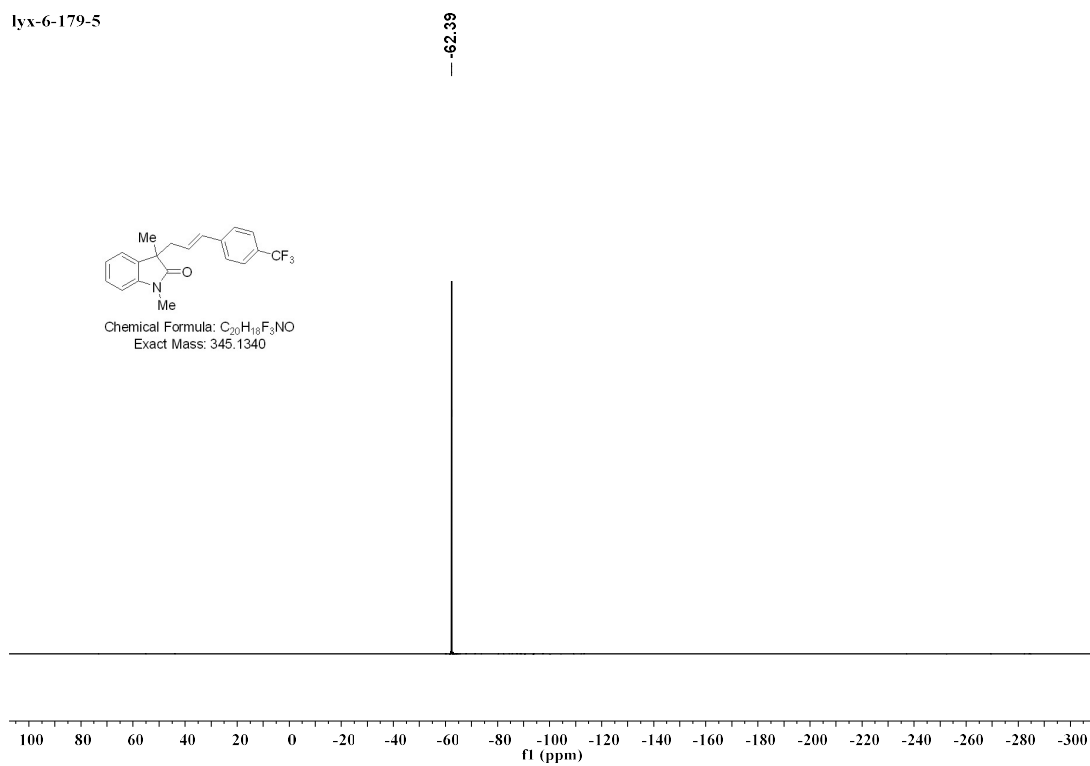



3ag

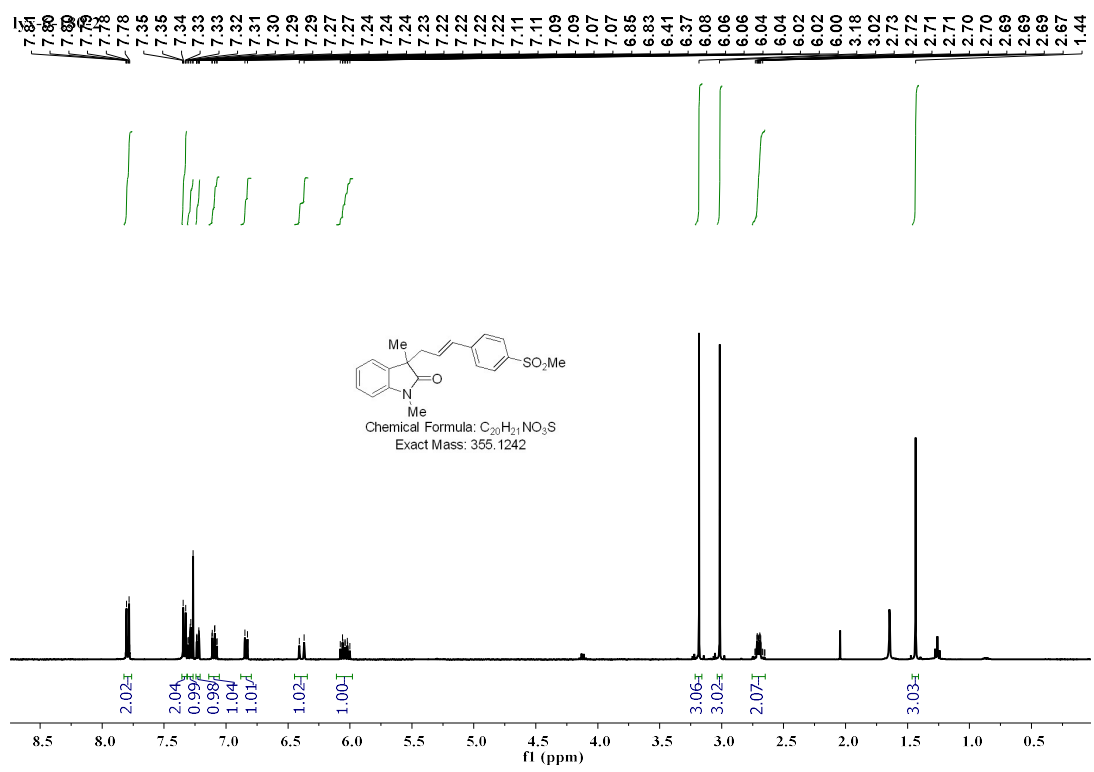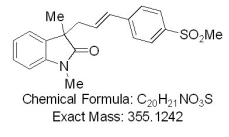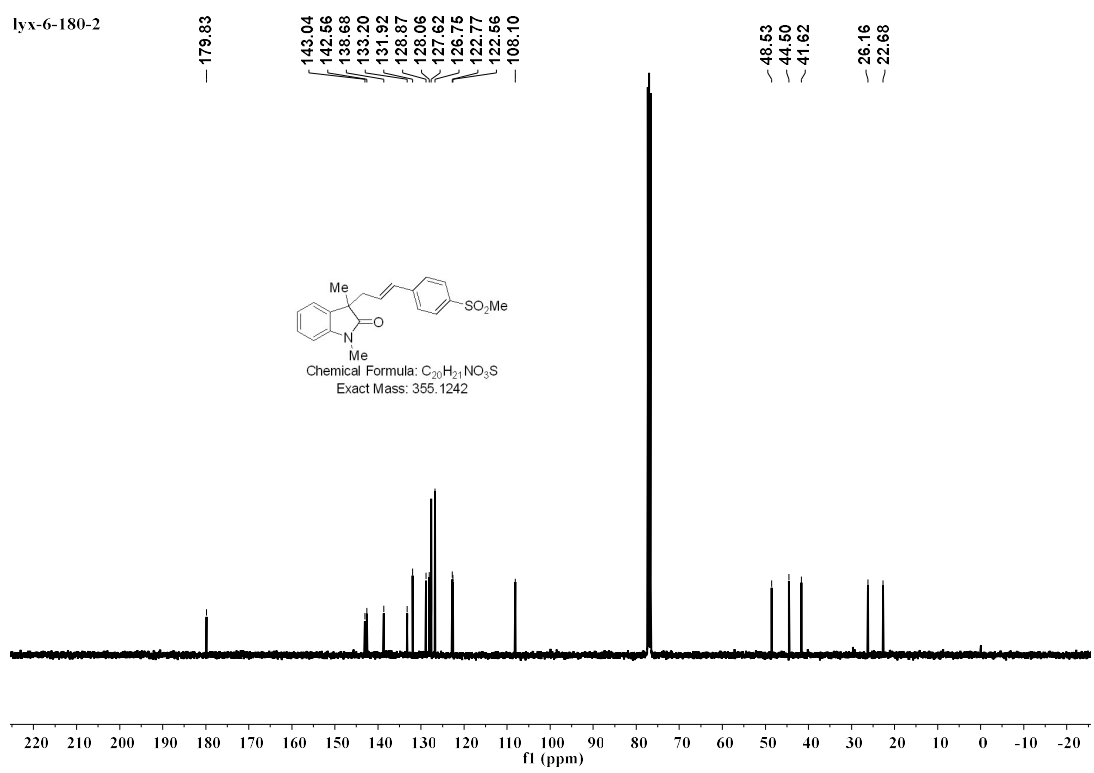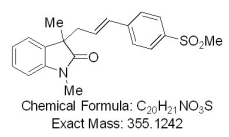

**3ah**

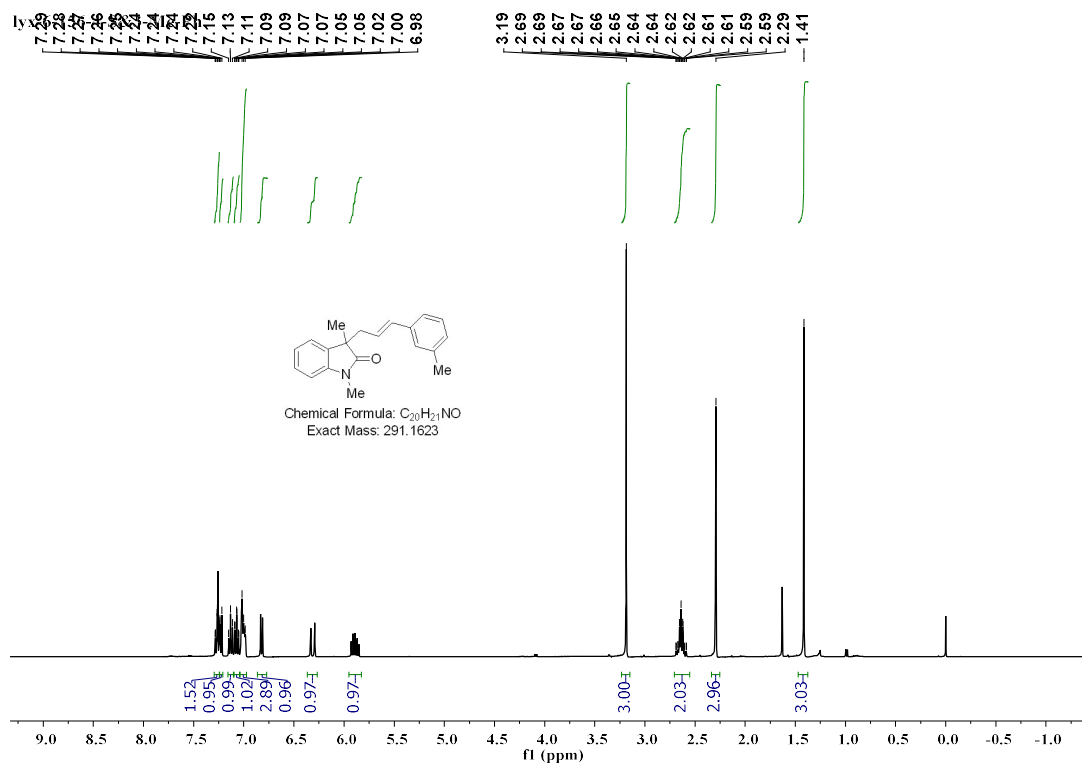

**lyx-6-156-4-S&3-Me-Ph**

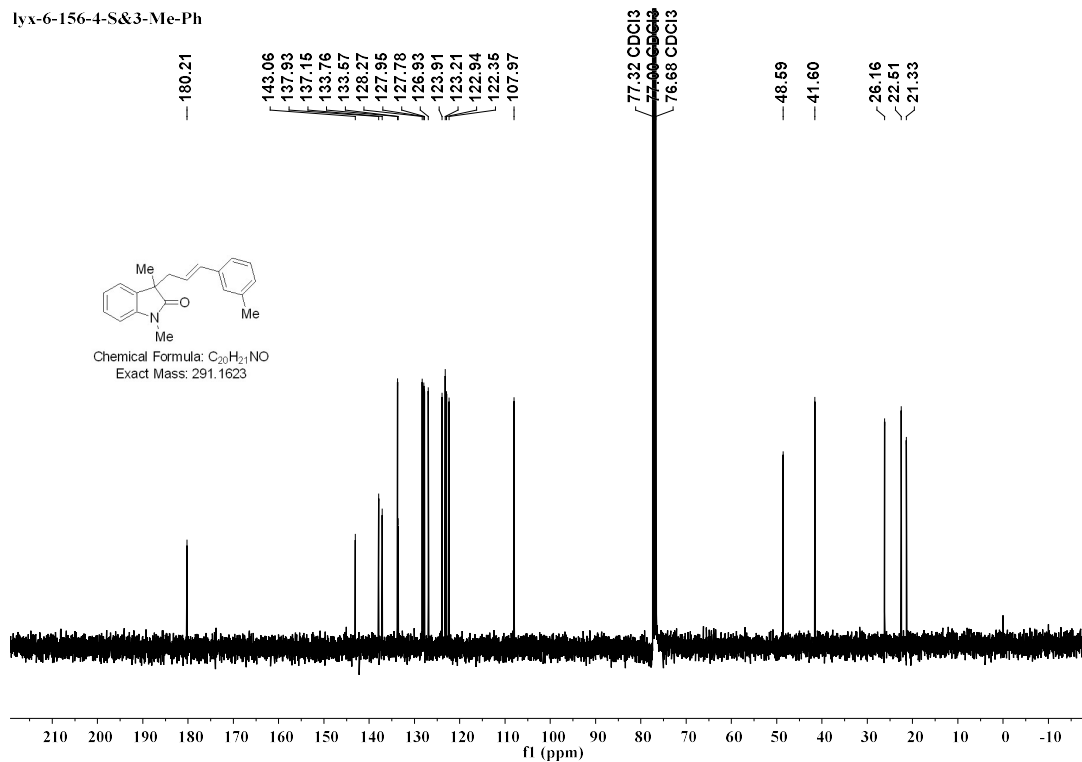

3ai

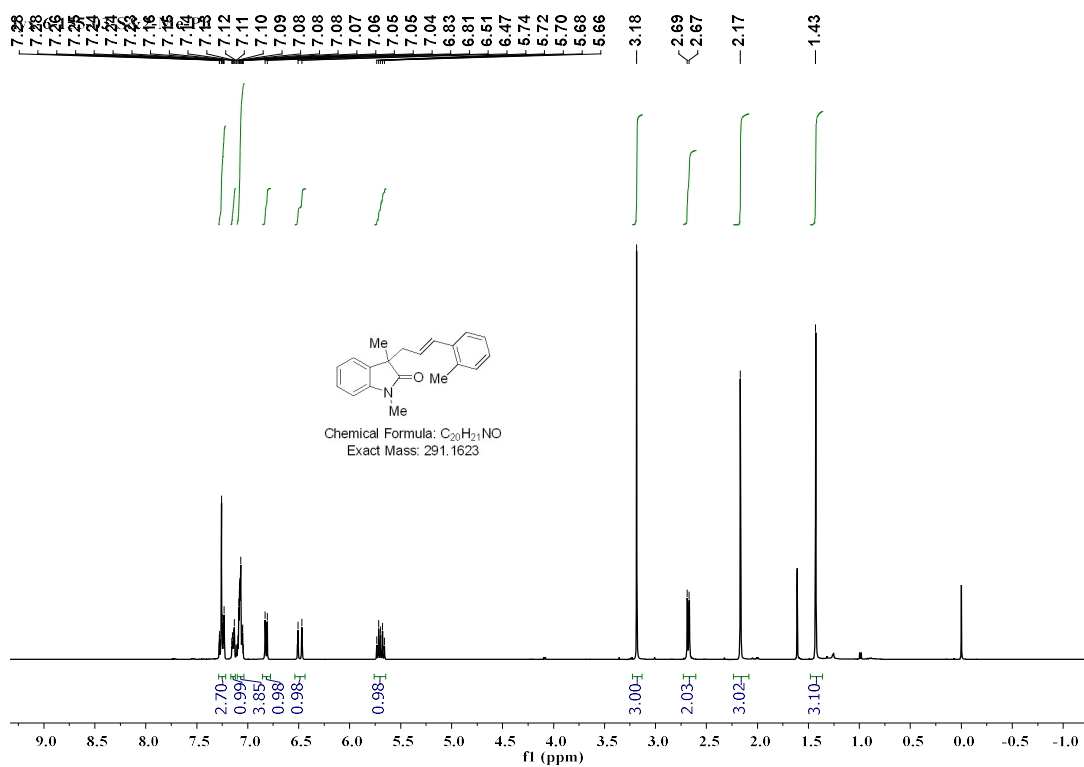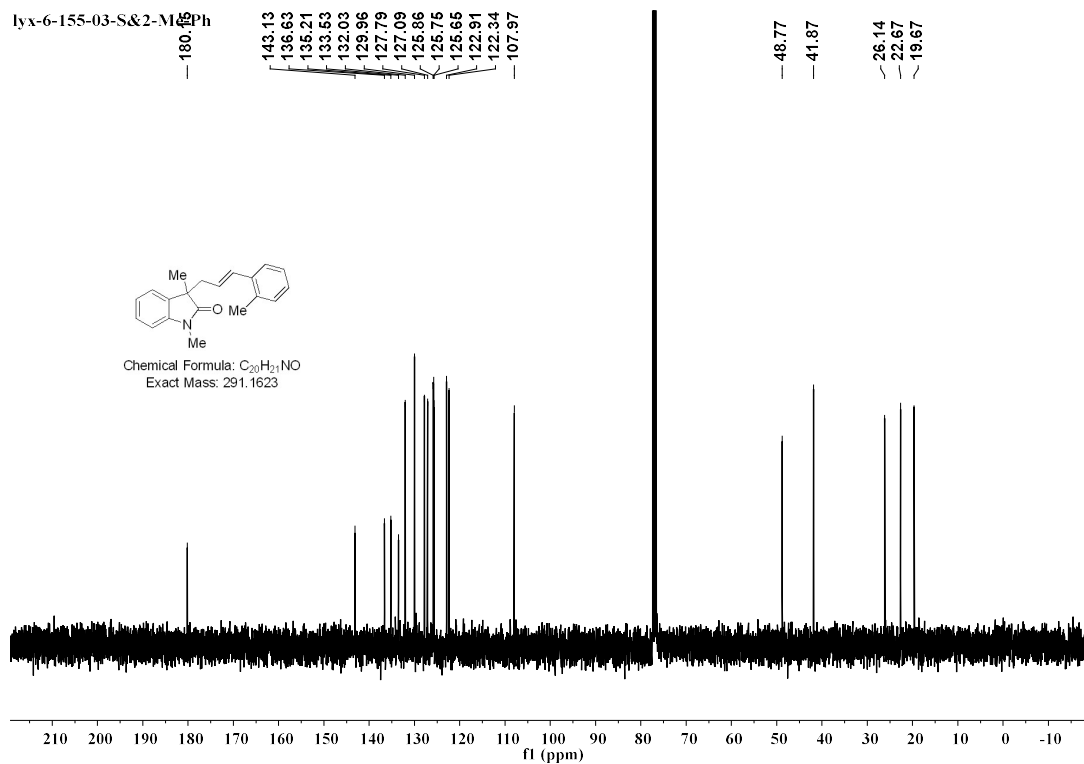

3aj

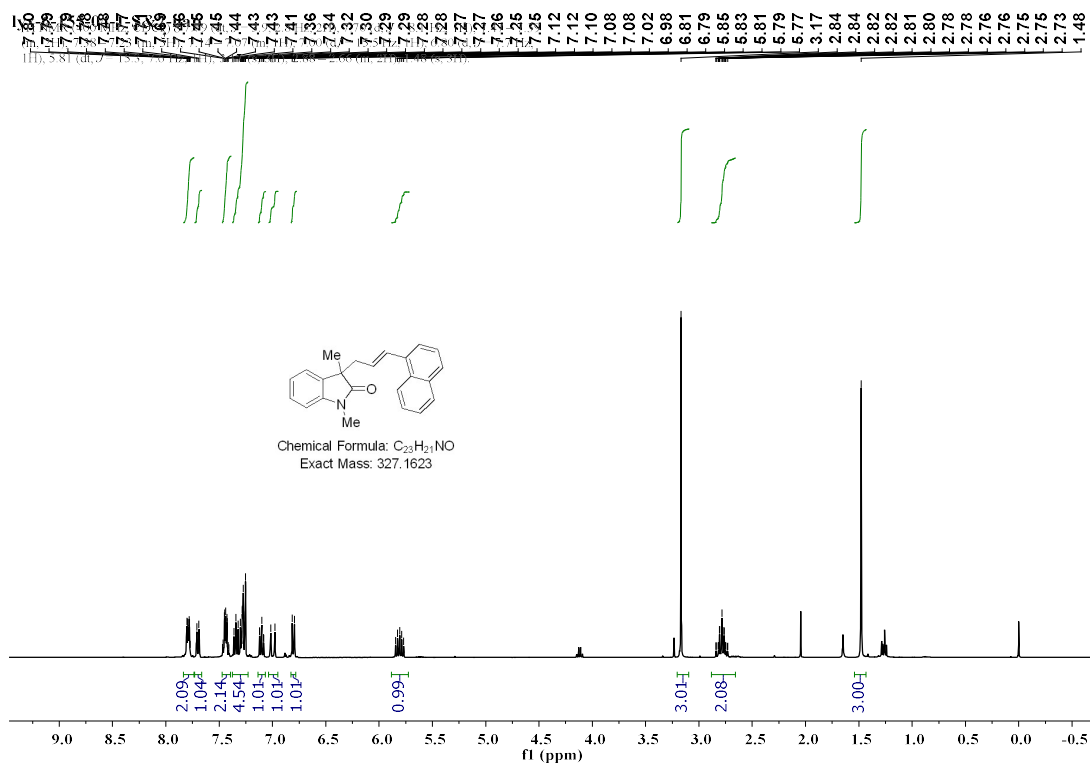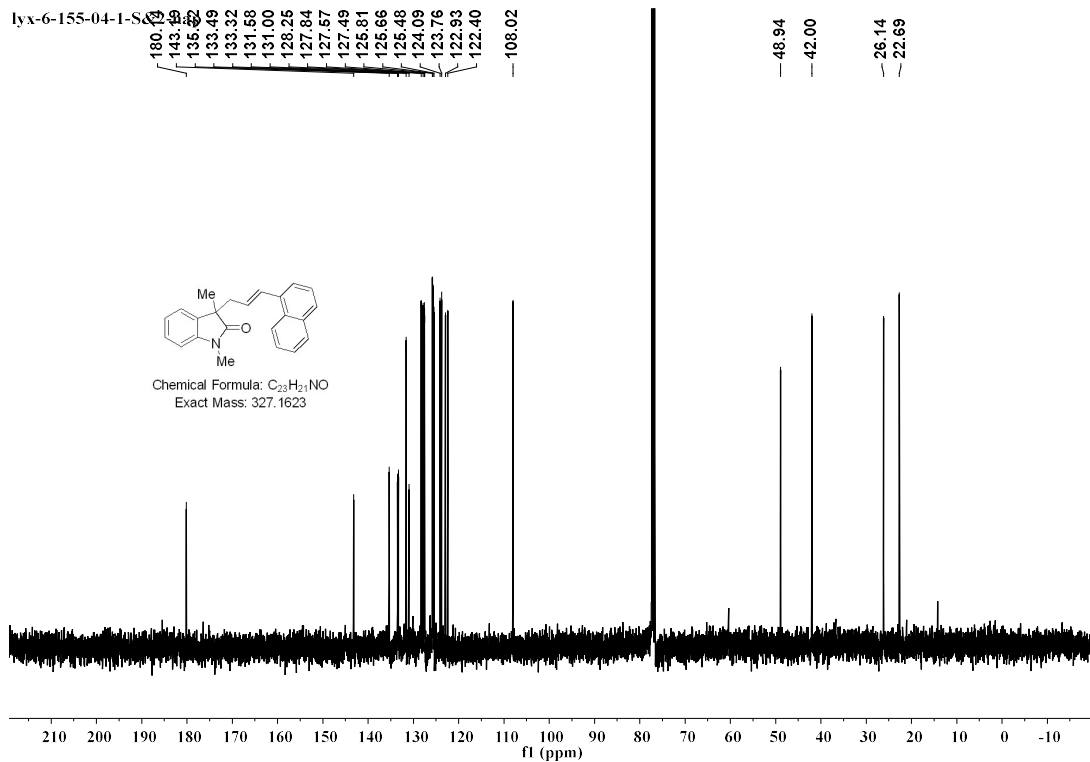

### 3ak

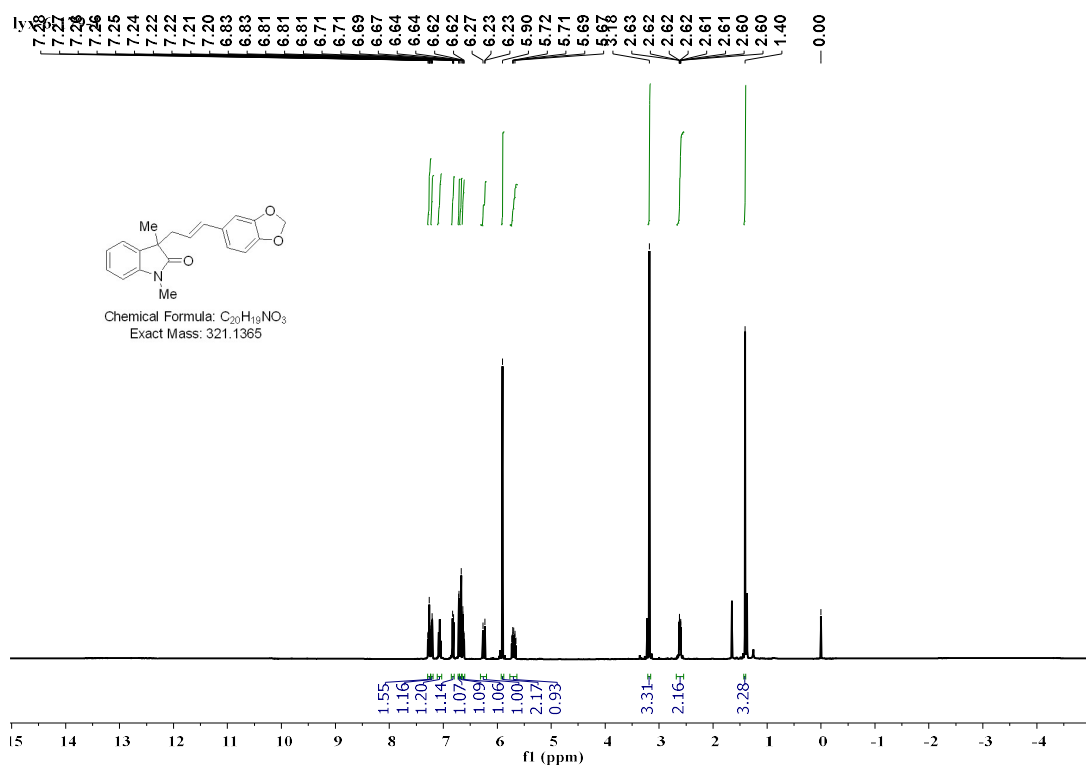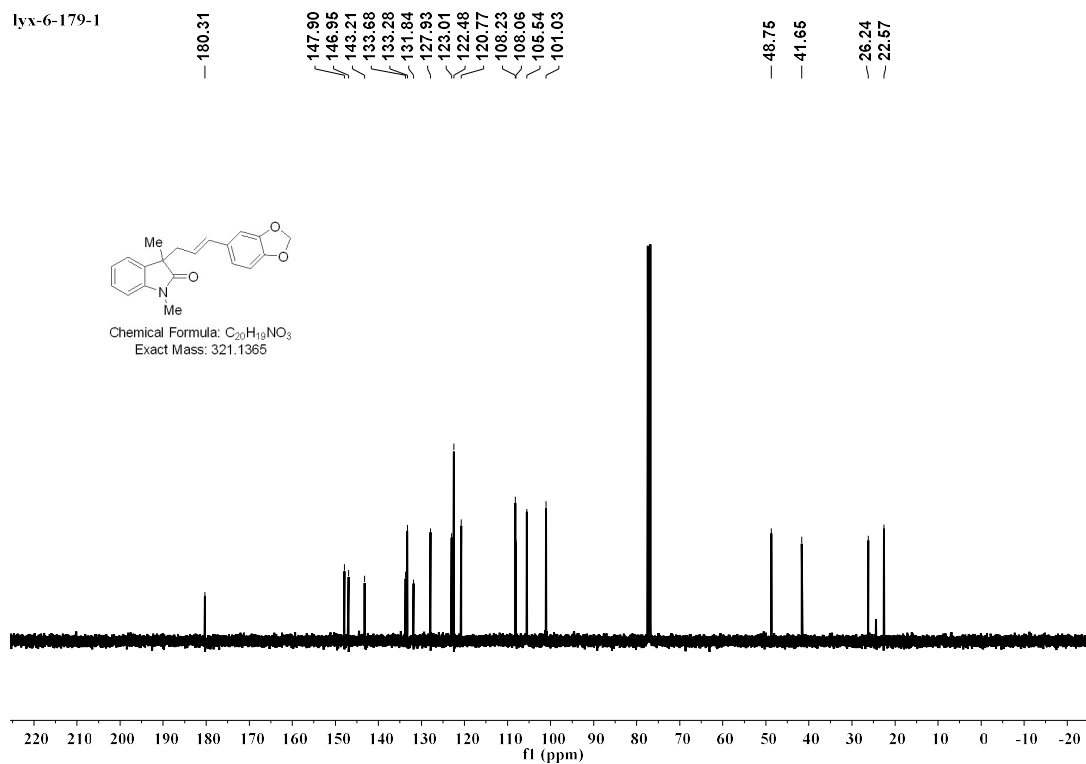

### 3al

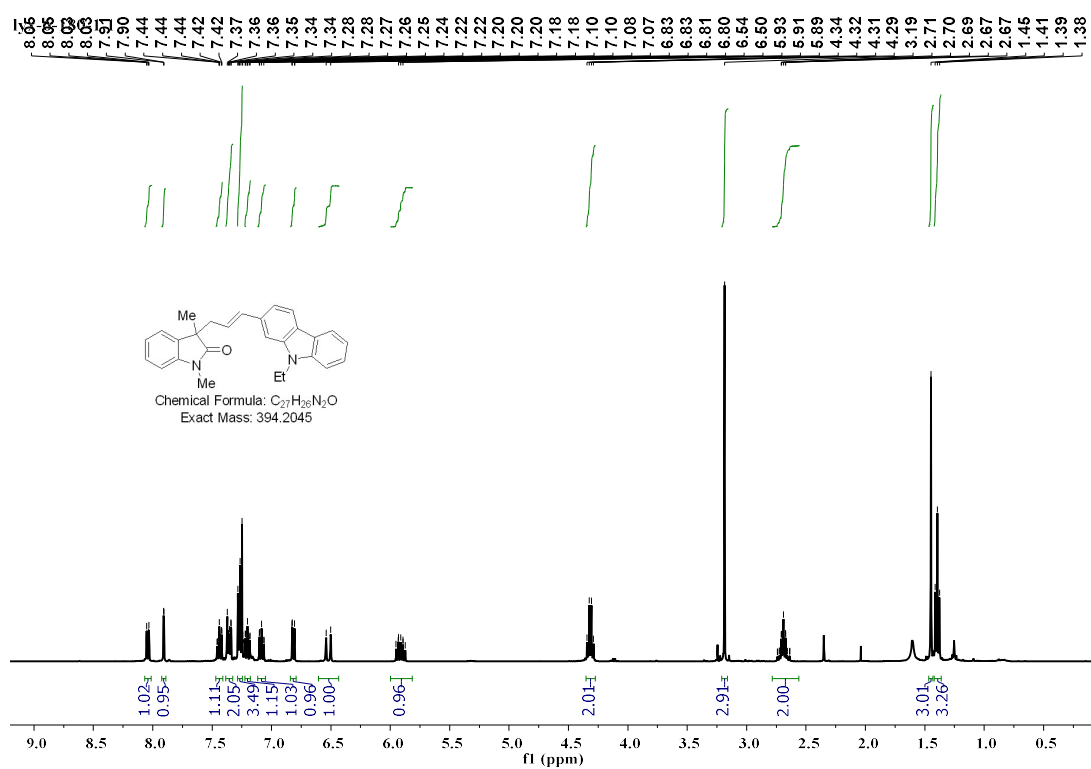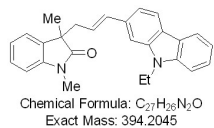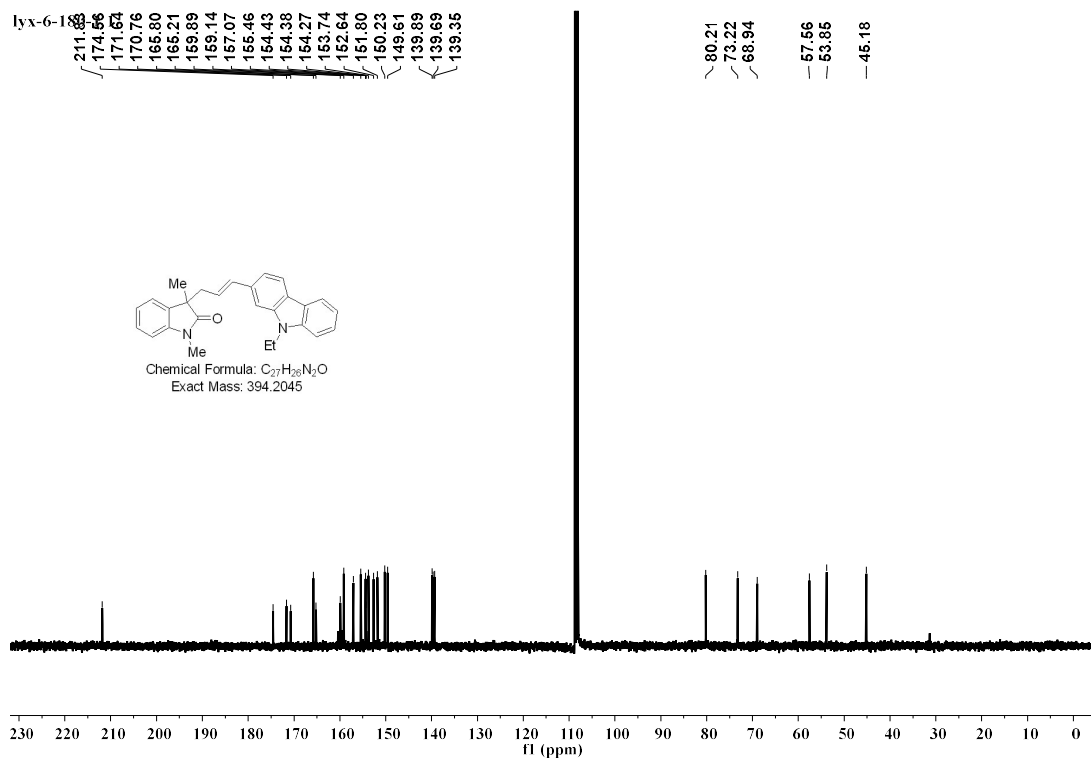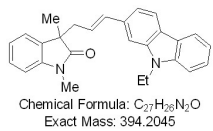

### 3am

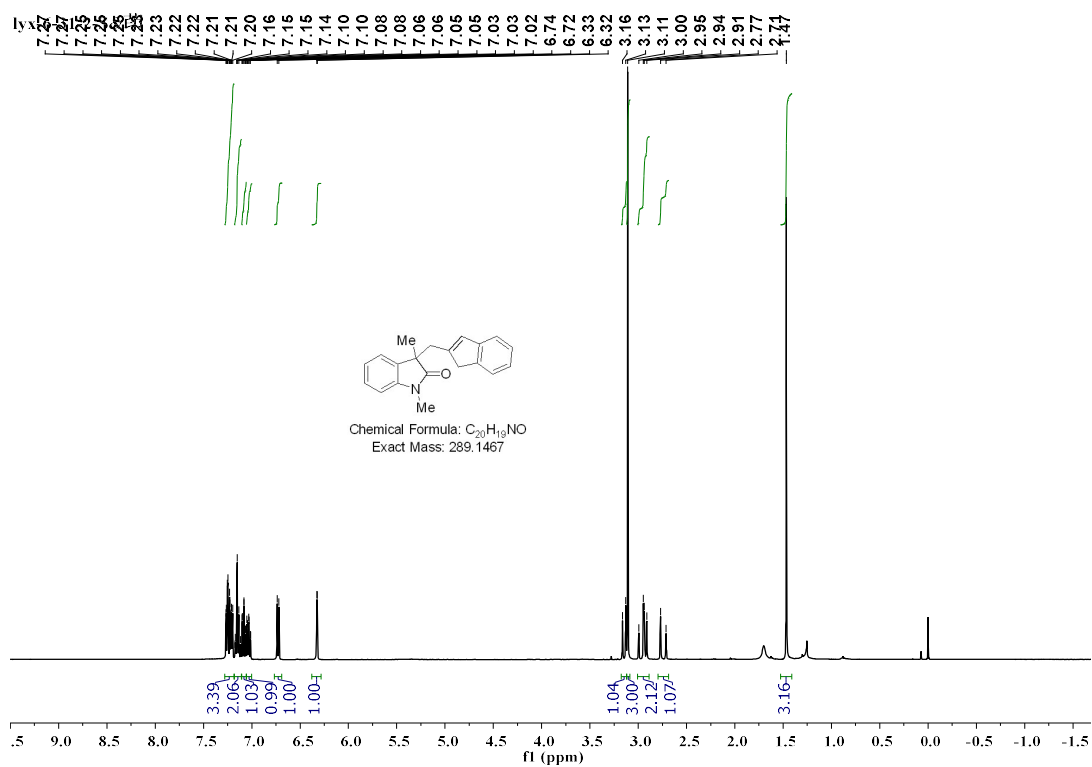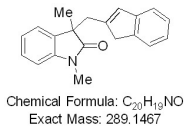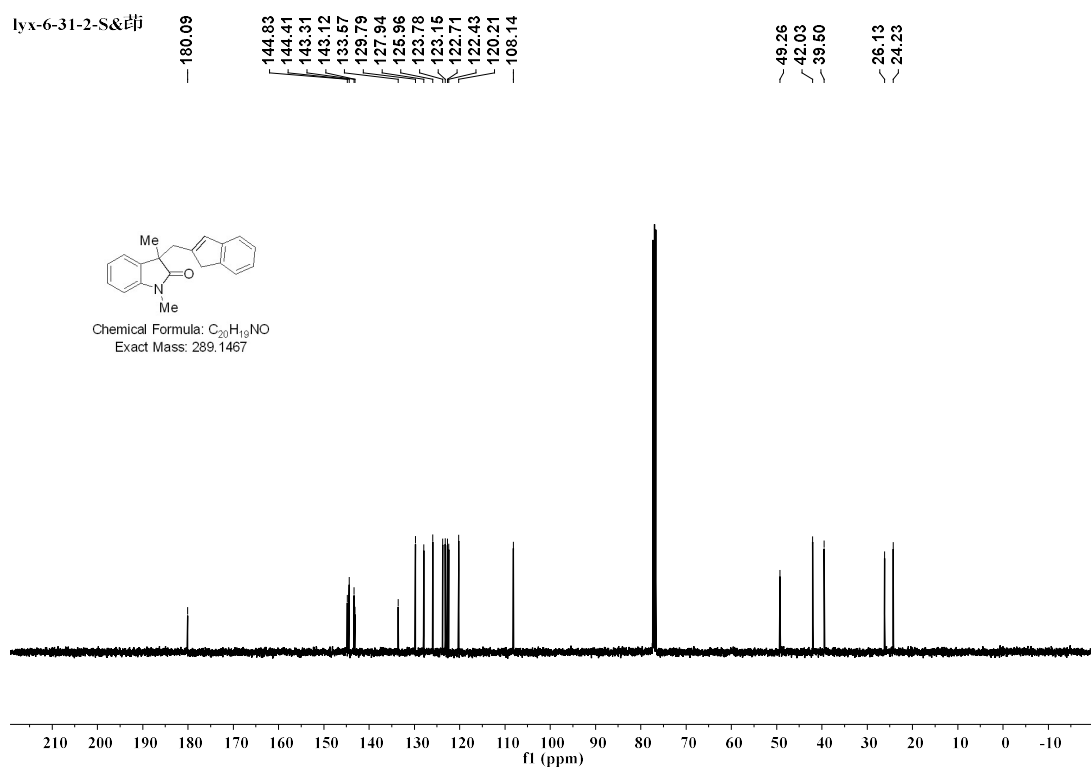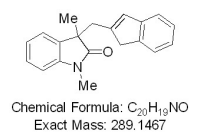

### 3an

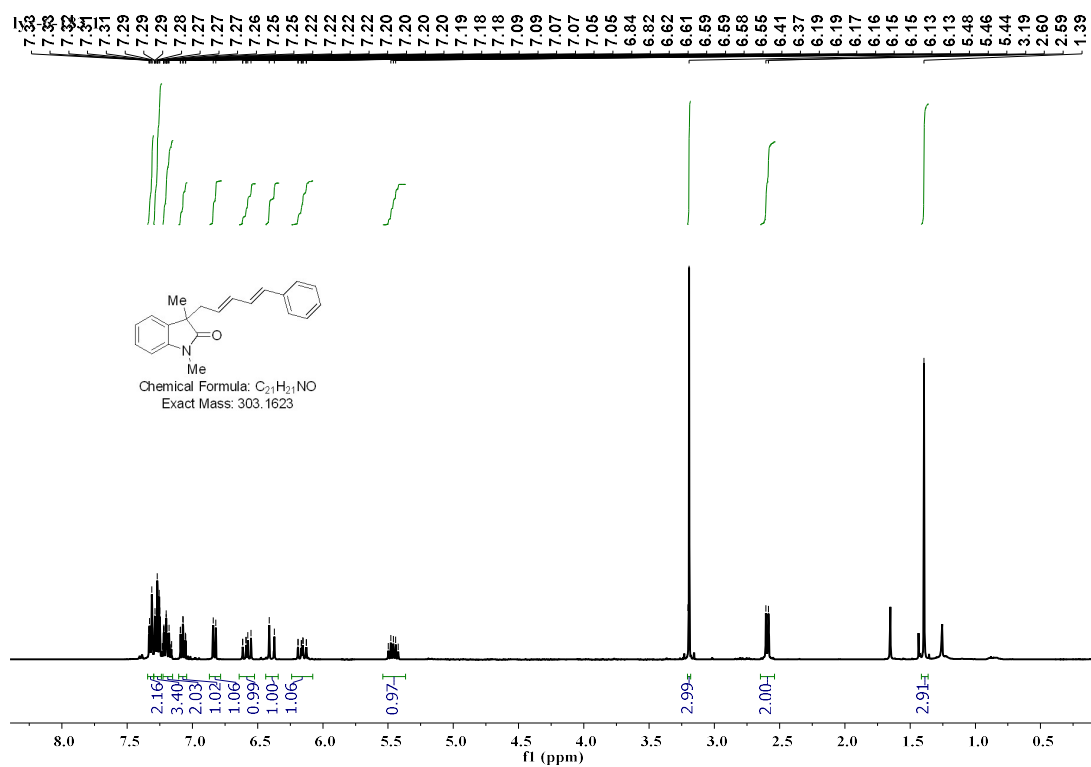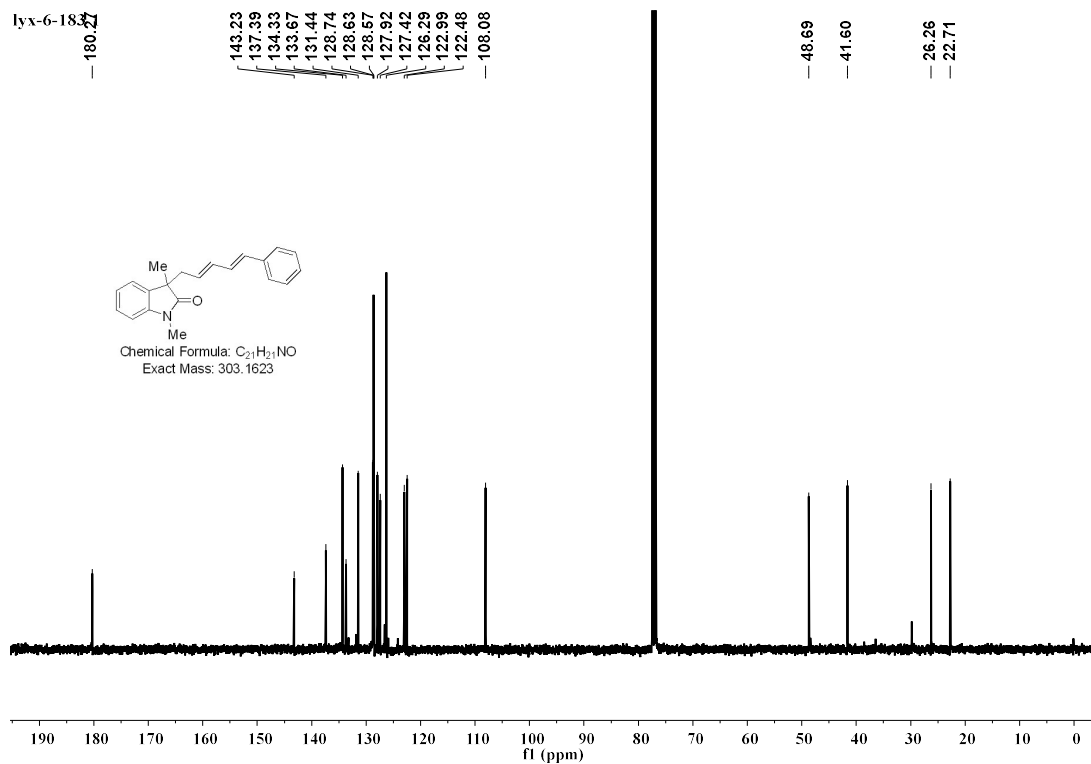



### 3bd

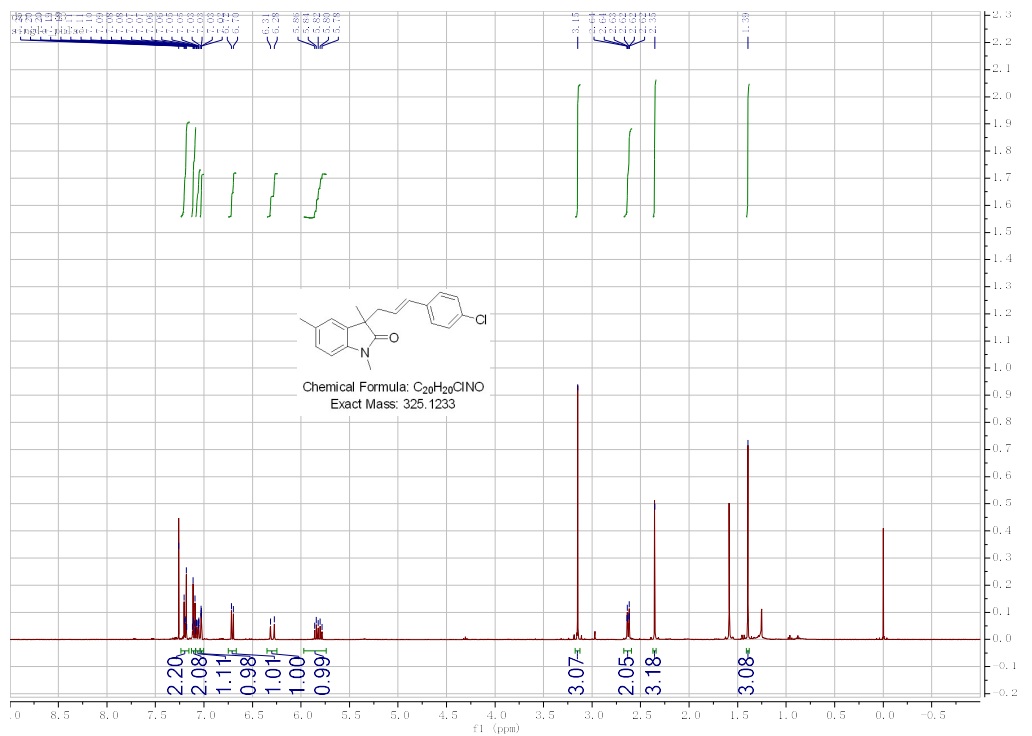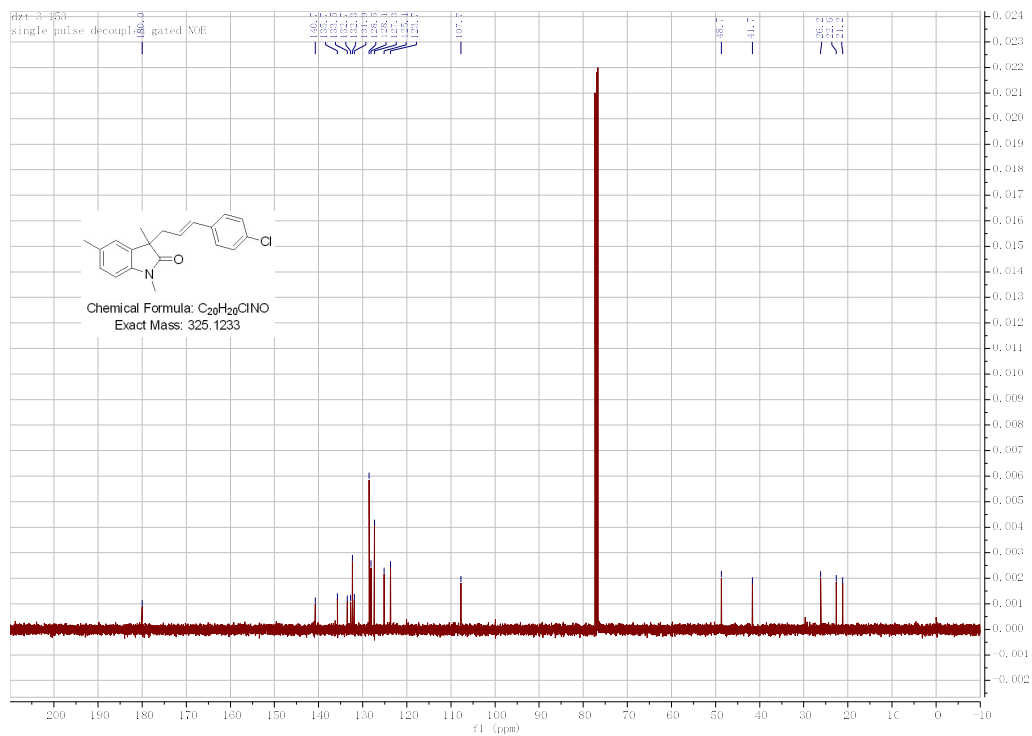

### 3bk

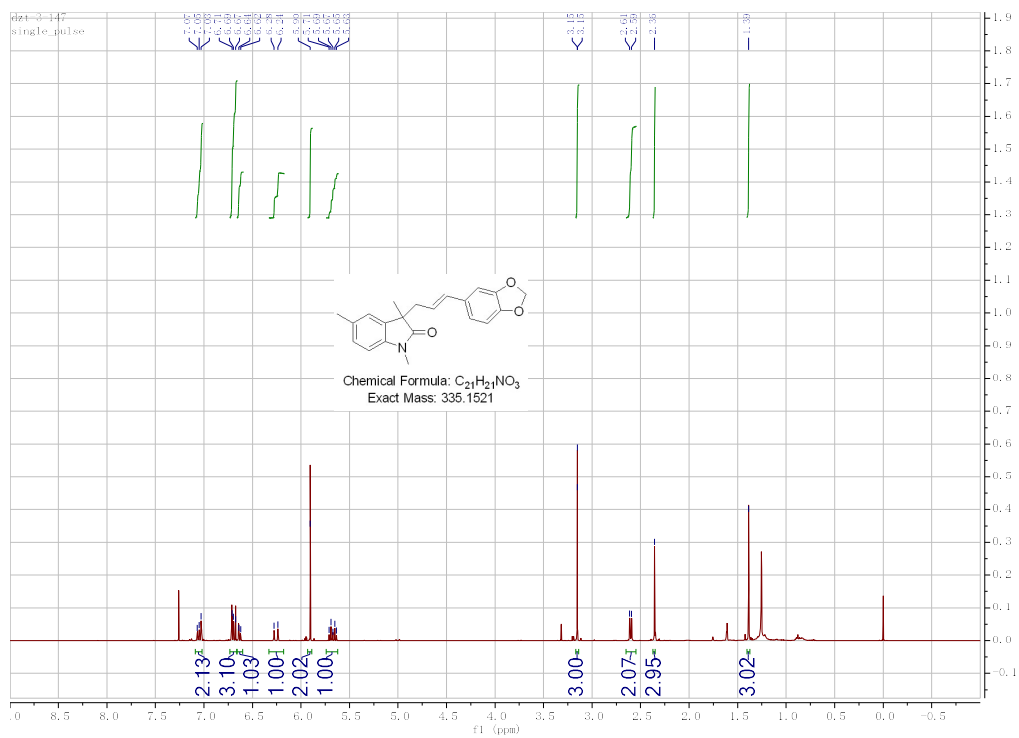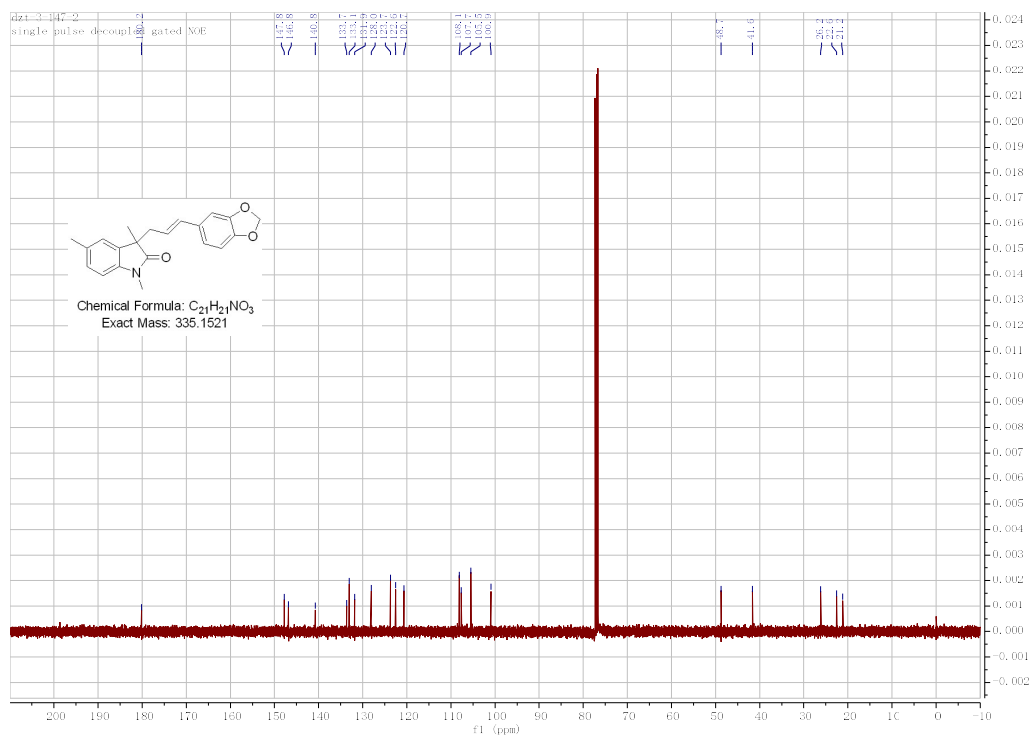

### 3bm

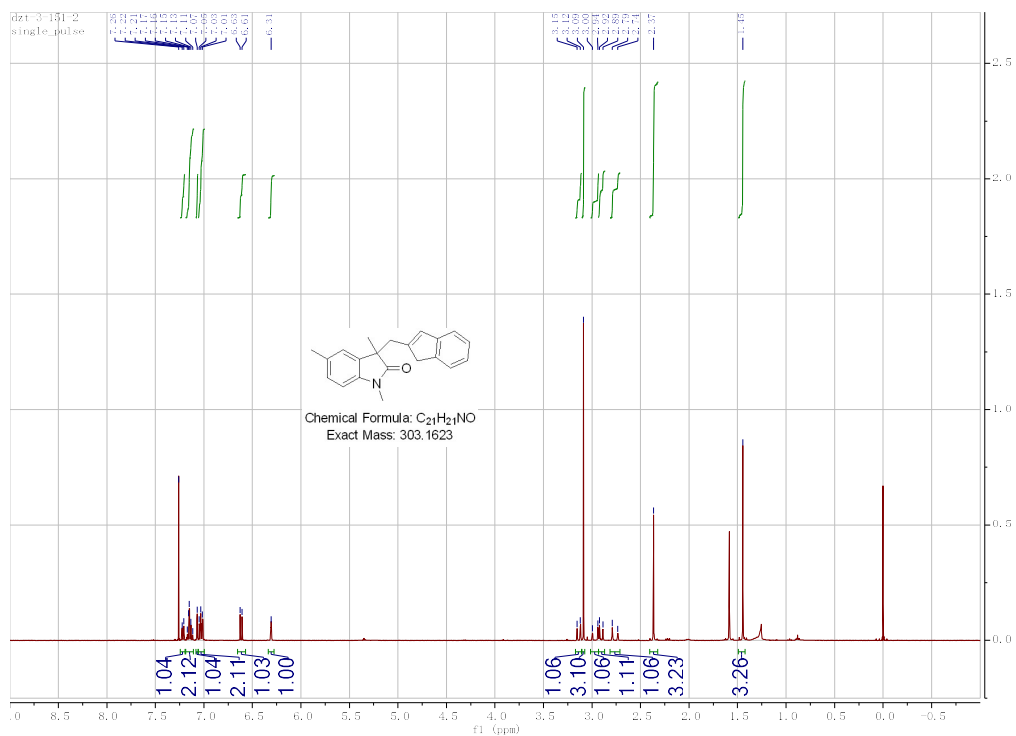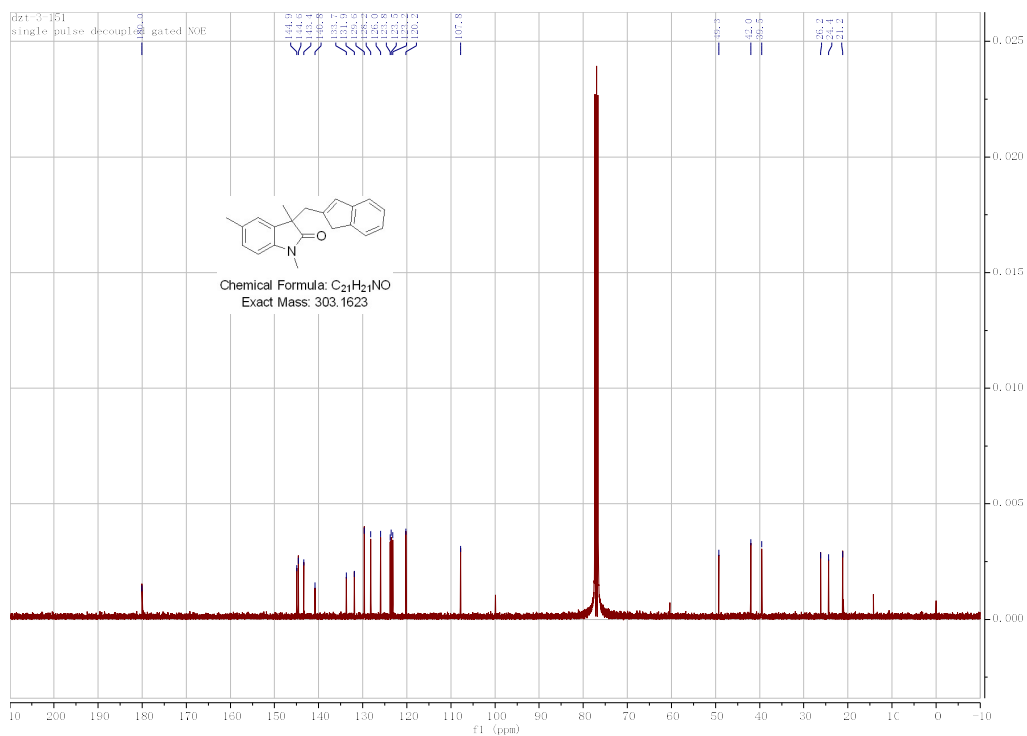

**3qa**

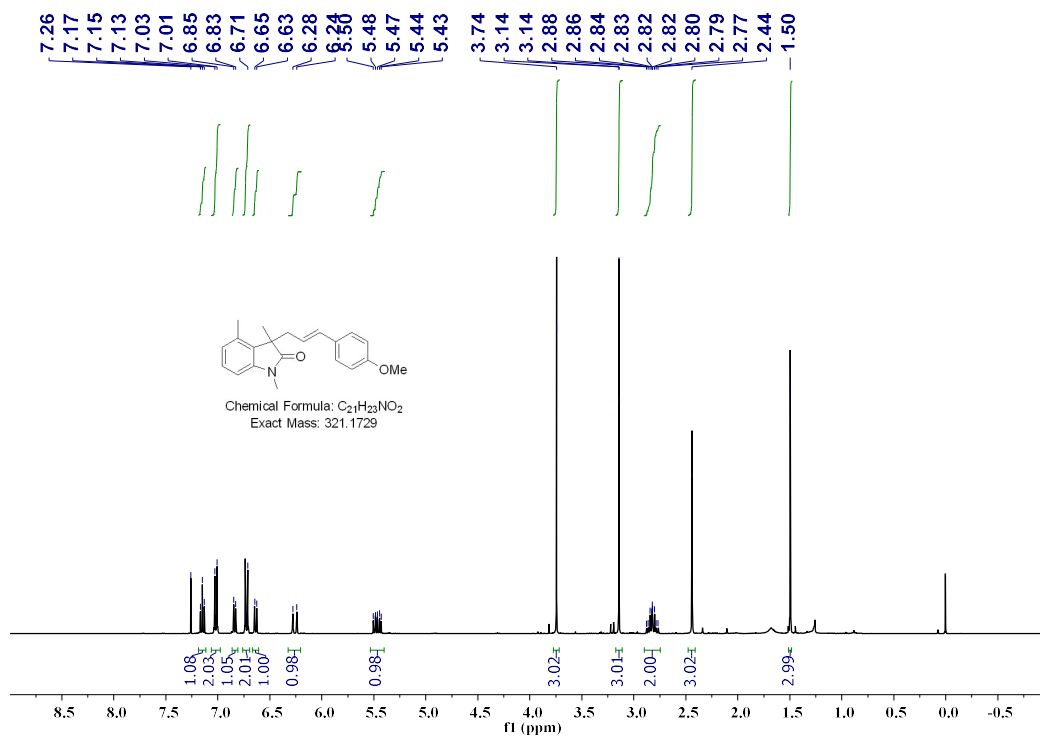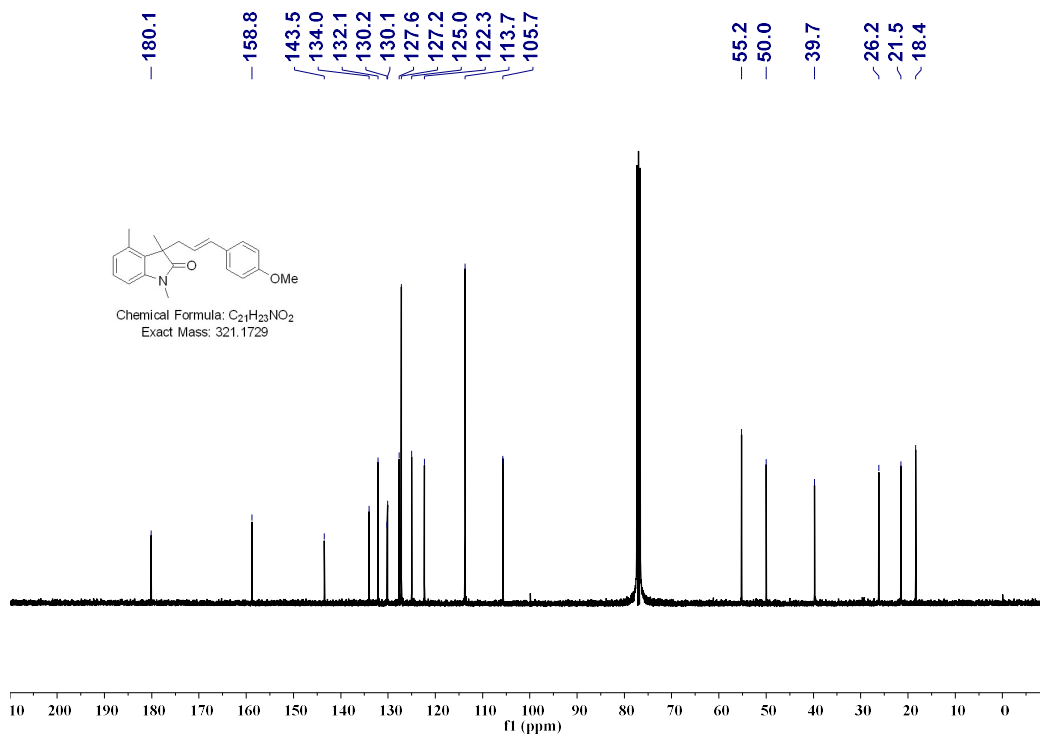

**5**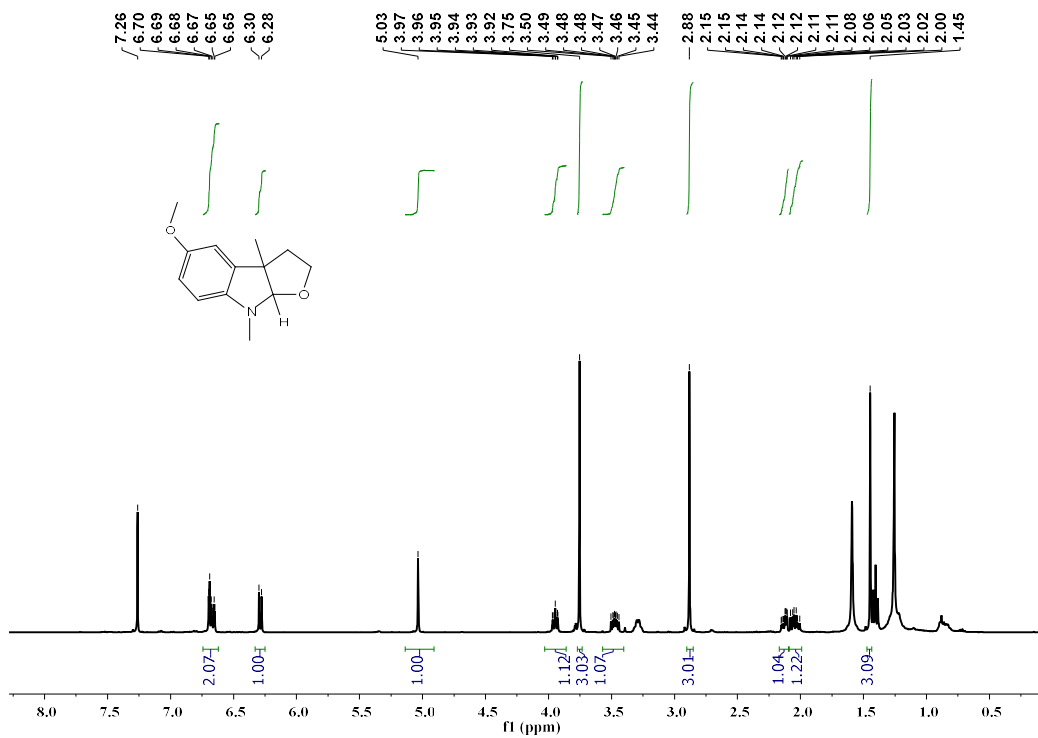**6**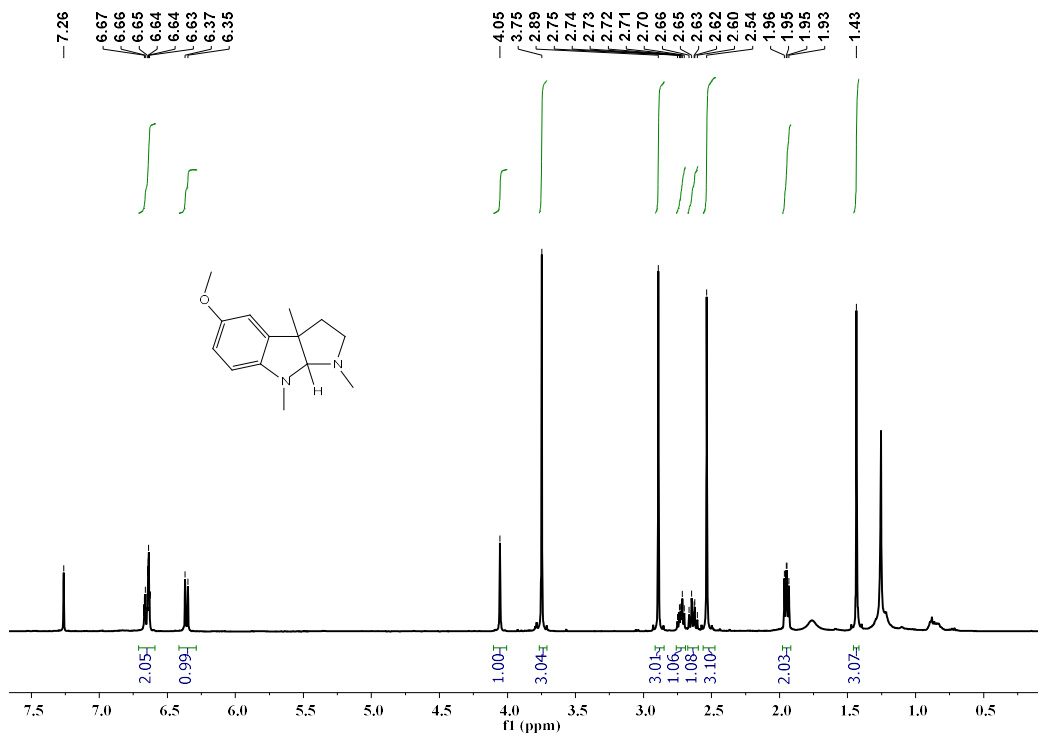

## 7. References

1. (a) Gao, S.; Liu, H.; Wu, Z.; Yao, H.; Lin, A. *Green Chem.* **2017**, *19*, 1861; (b) Liu, X.; Gu, Z. *Org. Chem. Front.* **2015**, *2*, 778.
2. (a) Zhou, B.; Hou, W.; Yang, Y.; Feng, H.; Li, Y. *Org. Lett.* **2014**, *16*, 1322. (b) T. Wang, W. Yao, F. Zhong, G. Pang, Y. Lu. *Angew. Chem. Int. Ed.* **2014**, *53*, 2964.
3. Q. Yu, W. Luo, Y. Li, *Heterocycles*, **1993**, *36*, 1279.
